# Supplementary material for: Direct C4–H phosphonation of 8-hydroxyquinoline derivatives employing photoredox catalysis and silver catalysis
Source: Royal Society of Chemistry journal article supplement (doi:10.1039/c8ob00370j), 2018-01-01

## Supporting Information

### Direct C4-H Phosphonation of 8-Hydroxyquinoline Derivatives

### Employing Photoredox Catalysis and Silver Catalysis

Xiaoxue Su,<sup>a</sup> Fan Yang,<sup>\*,a</sup> Yusheng Wu,<sup>\*,b</sup> and Yangjie Wu<sup>\*,a</sup>

<sup>a</sup> The College of Chemistry and Molecular Engineering, Henan Key Laboratory of Chemical Biology and Organic Chemistry, Key Laboratory of Applied Chemistry of Henan Universities, Zhengzhou University, Zhengzhou 450052, PR China

E-mail: yangf@zzu.edu.cn; wyj@zzu.edu.cn

<sup>b</sup> Tetranov Biopharm, LLC. & Collaborative Innovation Center of New Drug Research and Safety Evaluation, Zhengzhou 450052, PR China

E-mail: yusheng.wu@tetranovglobal.com

## Table of Contents

|                                                                                                                   |            |
|-------------------------------------------------------------------------------------------------------------------|------------|
| <b>1. General Information</b>                                                                                     | <b>S2</b>  |
| <b>2. Preparation of Substrates</b>                                                                               | <b>S2</b>  |
| <b>3. Optimization of Reaction Conditions</b>                                                                     | <b>S2</b>  |
| <b>4. Typical Procedure for the Products</b>                                                                      | <b>S4</b>  |
| <b>5. Characterization Data of the Products</b>                                                                   | <b>S4</b>  |
| <b>6. References</b>                                                                                              | <b>S14</b> |
| <b>7. The Single Crystal X-ray Diffraction Study of 3aa</b>                                                       | <b>S15</b> |
| <b>8. The Experiment of Trapping the Phosphonyl Radical</b>                                                       | <b>S16</b> |
| <b>9. Copies of <sup>1</sup>H, <sup>13</sup>C, <sup>31</sup>P and <sup>19</sup>F NMR Spectra for the Products</b> | <b>S16</b> |

## 1. General Information

$^1\text{H}$ ,  $^{13}\text{C}$  and  $^{31}\text{P}$  NMR spectra were recorded on a Bruker DPX-400 spectrometer using  $\text{CDCl}_3$  as the solvent and TMS as an internal standard. Melting points were measured using a WC-1 microscopic apparatus and are uncorrected. Mass spectra were measured on an LC-MSD-Trap-XCT instrument. High resolution mass spectra were ensured on a MALDI-FTMS. All solvents were used directly without further purification. Petroleum ether, ethyl acetate and hexane were used for column chromatography. Chemical shift multiplicities are represented as follows: (s = singlet, d = doublet, t = triplet, m = multiplet, dd = double doublet, td = triplet doublet). Unless otherwise mentioned, all materials were commercially obtained and used without further purification.

## 2. Preparation of Substrates

All of the esters substrates were prepared from the corresponding acids and 8-hydroxyquinoline according to the reported procedure.<sup>1</sup>

## 3. Optimization of Reaction Conditions

A 20 mL Schlenk tube was equipped with a magnetic stir bar and charged with 8-hydroxyquinoline ester **1a** (24.9 mg, 0.1 mmol), diphenylphosphine oxide **2a** (0.2 mmol, 2.0 equiv), photocatalyst (0.003 mmol, 3 mol%), AgX (0.01 mmol, 10 mol%), oxidant (0.2 mmol, 2 equiv), and solvent (1.0 mL). The resulting mixture was stirred under the irradiation of 26 W household light under nitrogen at room temperature for 6 h. Upon completion, the mixture was added into  $\text{H}_2\text{O}$  (20 mL) and extracted with  $\text{CH}_2\text{Cl}_2$  (20 mL) three times. The combined organic layer was dried over anhydrous  $\text{Na}_2\text{SO}_4$  and filtered. After evaporation of the solvent under vacuum, the residue was purified by column chromatography on silica gel (100–200 mesh) using  $\text{CH}_2\text{Cl}_2$ /ethyl acetate as an eluent (2:1, V/V) to afford the pure product **3aa**.

**Table S1** Screening of Reaction Conditions<sup>a</sup>

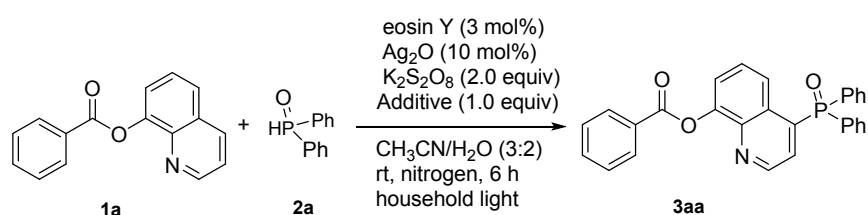

| Entry | Photocatalyst | AgX                      | Oxidant                          | Solvent                                         | Addition | yield (%) <sup>b</sup> |
|-------|---------------|--------------------------|----------------------------------|-------------------------------------------------|----------|------------------------|
| 1     | acid red 94   | $\text{Ag}_2\text{O}$    | $\text{K}_2\text{S}_2\text{O}_8$ | $\text{CH}_3\text{CN}/\text{H}_2\text{O}$ (3:2) | -        | 50%                    |
| 2     | acid red 94   | $\text{AgOAc}$           | $\text{K}_2\text{S}_2\text{O}_8$ | $\text{CH}_3\text{CN}/\text{H}_2\text{O}$ (3:2) | -        | trace                  |
| 3     | acid red 94   | $\text{AgI}$             | $\text{K}_2\text{S}_2\text{O}_8$ | $\text{CH}_3\text{CN}/\text{H}_2\text{O}$ (3:2) | -        | trace                  |
| 4     | acid red 94   | $\text{AgNO}_2$          | $\text{K}_2\text{S}_2\text{O}_8$ | $\text{CH}_3\text{CN}/\text{H}_2\text{O}$ (3:2) | -        | 37%                    |
| 5     | acid red 94   | $\text{Ag}_3\text{PO}_4$ | $\text{K}_2\text{S}_2\text{O}_8$ | $\text{CH}_3\text{CN}/\text{H}_2\text{O}$ (3:2) | -        | trace                  |
| 6     | acid red 94   | $\text{AgNO}_3$          | $\text{K}_2\text{S}_2\text{O}_8$ | $\text{CH}_3\text{CN}/\text{H}_2\text{O}$ (3:2) | -        | 44%                    |
| 7     | acid red 94   | $\text{Ag}_2\text{CO}_3$ | $\text{K}_2\text{S}_2\text{O}_8$ | $\text{CH}_3\text{CN}/\text{H}_2\text{O}$ (3:2) | -        | 48%                    |
| 8     | acid red 94   | $\text{Ag}_2\text{SO}_4$ | $\text{K}_2\text{S}_2\text{O}_8$ | $\text{CH}_3\text{CN}/\text{H}_2\text{O}$ (3:2) | -        | trace                  |
| 9     | acid red 94   | $\text{AgOTf}$           | $\text{K}_2\text{S}_2\text{O}_8$ | $\text{CH}_3\text{CN}/\text{H}_2\text{O}$ (3:2) | -        | trace                  |

|                  |                                        |                   |                                                               |                                           |                                 |       |
|------------------|----------------------------------------|-------------------|---------------------------------------------------------------|-------------------------------------------|---------------------------------|-------|
| 10               | eosin Y                                | Ag <sub>2</sub> O | K <sub>2</sub> S <sub>2</sub> O <sub>8</sub>                  | CH <sub>3</sub> CN/H <sub>2</sub> O(3:2)  | -                               | 74%   |
| 11               | eosin B                                | Ag <sub>2</sub> O | K <sub>2</sub> S <sub>2</sub> O <sub>8</sub>                  | CH <sub>3</sub> CN/H <sub>2</sub> O(3:2)  | -                               | 43%   |
| 12               | [Ru(bpy) <sub>3</sub> ]Cl <sub>2</sub> | Ag <sub>2</sub> O | K <sub>2</sub> S <sub>2</sub> O <sub>8</sub>                  | CH <sub>3</sub> CN/H <sub>2</sub> O(3:2)  | -                               | 42%   |
| 13               | alizarin red S                         | Ag <sub>2</sub> O | K <sub>2</sub> S <sub>2</sub> O <sub>8</sub>                  | CH <sub>3</sub> CN/H <sub>2</sub> O(3:2)  | -                               | 20%   |
| 14               | Ir(bpy) <sub>2</sub>                   | Ag <sub>2</sub> O | K <sub>2</sub> S <sub>2</sub> O <sub>8</sub>                  | CH <sub>3</sub> CN/H <sub>2</sub> O(3:2)  | -                               | 43%   |
| 15               | eosin Y                                | Ag <sub>2</sub> O | NMO                                                           | CH <sub>3</sub> CN/H <sub>2</sub> O(3:2)  | -                               | trace |
| 16               | eosin Y                                | Ag <sub>2</sub> O | BQ                                                            | CH <sub>3</sub> CN/H <sub>2</sub> O(3:2)  | -                               | trace |
| 17               | eosin Y                                | Ag <sub>2</sub> O | TBHP                                                          | CH <sub>3</sub> CN/H <sub>2</sub> O(3:2)  | -                               | 38%   |
| 18               | eosin Y                                | Ag <sub>2</sub> O | DTBP                                                          | CH <sub>3</sub> CN/H <sub>2</sub> O(3:2)  | -                               | 20%   |
| 19               | eosin Y                                | Ag <sub>2</sub> O | TBPB                                                          | CH <sub>3</sub> CN/H <sub>2</sub> O(3:2)  | -                               | trace |
| 20               | eosin Y                                | Ag <sub>2</sub> O | (NH <sub>4</sub> ) <sub>2</sub> S <sub>2</sub> O <sub>8</sub> | CH <sub>3</sub> CN/H <sub>2</sub> O(3:2)  | -                               | 45%   |
| 21               | eosin Y                                | Ag <sub>2</sub> O | Na <sub>2</sub> S <sub>2</sub> O <sub>8</sub>                 | CH <sub>3</sub> CN/H <sub>2</sub> O(3:2)  | -                               | 57%   |
| 22               | eosin Y                                | Ag <sub>2</sub> O | PhI(OAc) <sub>2</sub>                                         | CH <sub>3</sub> CN/H <sub>2</sub> O(3:2)  | -                               | NR    |
| 23               | eosin Y                                | Ag <sub>2</sub> O | -                                                             | CH <sub>3</sub> CN/H <sub>2</sub> O(3:2)  | -                               | NR    |
| 24               | eosin Y                                | Ag <sub>2</sub> O | K <sub>2</sub> S <sub>2</sub> O <sub>8</sub>                  | CH <sub>3</sub> CN/H <sub>2</sub> O(3:2)  | NaOAc                           | trace |
| 25               | eosin Y                                | Ag <sub>2</sub> O | K <sub>2</sub> S <sub>2</sub> O <sub>8</sub>                  | CH <sub>3</sub> CN/H <sub>2</sub> O(3:2)  | PivONa                          | trace |
| 26               | eosin Y                                | Ag <sub>2</sub> O | K <sub>2</sub> S <sub>2</sub> O <sub>8</sub>                  | CH <sub>3</sub> CN/H <sub>2</sub> O(3:2)  | K <sub>3</sub> PO <sub>4</sub>  | NR    |
| 27               | eosin Y                                | Ag <sub>2</sub> O | K <sub>2</sub> S <sub>2</sub> O <sub>8</sub>                  | CH <sub>3</sub> CN/H <sub>2</sub> O(3:2)  | Na <sub>2</sub> CO <sub>3</sub> | trace |
| 28               | eosin Y                                | Ag <sub>2</sub> O | K <sub>2</sub> S <sub>2</sub> O <sub>8</sub>                  | CH <sub>3</sub> CN/H <sub>2</sub> O(3:2)  | PivOH                           | trace |
| 29               | eosin Y                                | Ag <sub>2</sub> O | K <sub>2</sub> S <sub>2</sub> O <sub>8</sub>                  | DCE                                       | -                               | NR    |
| 30               | eosin Y                                | Ag <sub>2</sub> O | K <sub>2</sub> S <sub>2</sub> O <sub>8</sub>                  | Dioxane                                   | -                               | NR    |
| 31               | eosin Y                                | Ag <sub>2</sub> O | K <sub>2</sub> S <sub>2</sub> O <sub>8</sub>                  | Acetone                                   | -                               | NR    |
| 32               | eosin Y                                | Ag <sub>2</sub> O | K <sub>2</sub> S <sub>2</sub> O <sub>8</sub>                  | CH <sub>3</sub> CN/H <sub>2</sub> O(1:1)  | -                               | 39%   |
| 33               | eosin Y                                | Ag <sub>2</sub> O | K <sub>2</sub> S <sub>2</sub> O <sub>8</sub>                  | CH <sub>3</sub> CN/H <sub>2</sub> O(2:1)  | -                               | 10%   |
| 34               | eosin Y                                | Ag <sub>2</sub> O | K <sub>2</sub> S <sub>2</sub> O <sub>8</sub>                  | CH <sub>3</sub> CN/H <sub>2</sub> O(2:3)  | -                               | 18%   |
| 35               | eosin Y                                | Ag <sub>2</sub> O | K <sub>2</sub> S <sub>2</sub> O <sub>8</sub>                  | CH <sub>3</sub> CN/H <sub>2</sub> O(10:0) | -                               | NR    |
| 36               | eosin Y                                | Ag <sub>2</sub> O | K <sub>2</sub> S <sub>2</sub> O <sub>8</sub>                  | CH <sub>3</sub> CN/H <sub>2</sub> O(0:10) | -                               | 22%   |
| 37               | eosin Y                                | Ag <sub>2</sub> O | K <sub>2</sub> S <sub>2</sub> O <sub>8</sub>                  | Acetone/H <sub>2</sub> O(1:1)             | -                               | 54%   |
| 38 <sup>e</sup>  | eosin Y                                | Ag <sub>2</sub> O | K <sub>2</sub> S <sub>2</sub> O <sub>8</sub>                  | CH <sub>3</sub> CN/H <sub>2</sub> O(3:2)  | -                               | 60%   |
| 39 <sup>d</sup>  | eosin Y                                | Ag <sub>2</sub> O | K <sub>2</sub> S <sub>2</sub> O <sub>8</sub>                  | CH <sub>3</sub> CN/H <sub>2</sub> O(3:2)  | -                               | <5%   |
| 40 <sup>e</sup>  | eosin Y                                | Ag <sub>2</sub> O | K <sub>2</sub> S <sub>2</sub> O <sub>8</sub>                  | CH <sub>3</sub> CN/H <sub>2</sub> O(3:2)  | -                               | <5%   |
| 41 <sup>f</sup>  | eosin Y                                | Ag <sub>2</sub> O | K <sub>2</sub> S <sub>2</sub> O <sub>8</sub>                  | CH <sub>3</sub> CN/H <sub>2</sub> O(3:2)  | -                               | 20%   |
| 42 <sup>lg</sup> | eosin Y                                | Ag <sub>2</sub> O | K <sub>2</sub> S <sub>2</sub> O <sub>8</sub>                  | CH <sub>3</sub> CN/H <sub>2</sub> O(3:2)  | -                               | <5%   |
| 43 <sup>lh</sup> | eosin Y                                | Ag <sub>2</sub> O | K <sub>2</sub> S <sub>2</sub> O <sub>8</sub>                  | CH <sub>3</sub> CN/H <sub>2</sub> O(3:2)  | -                               | <5%   |
| 44 <sup>li</sup> | -                                      | Ag <sub>2</sub> O | K <sub>2</sub> S <sub>2</sub> O <sub>8</sub>                  | CH <sub>3</sub> CN/H <sub>2</sub> O(3:2)  | -                               | NR    |
| 45 <sup>i</sup>  | eosin Y                                | Ag <sub>2</sub> O | K <sub>2</sub> S <sub>2</sub> O <sub>8</sub>                  | CH <sub>3</sub> CN/H <sub>2</sub> O(3:2)  | -                               | 78%   |
| 46 <sup>k</sup>  | eosin Y                                | Ag <sub>2</sub> O | K <sub>2</sub> S <sub>2</sub> O <sub>8</sub>                  | CH <sub>3</sub> CN/H <sub>2</sub> O(3:2)  | -                               | 65%   |
| 47 <sup>l</sup>  | eosin Y                                | Ag <sub>2</sub> O | K <sub>2</sub> S <sub>2</sub> O <sub>8</sub>                  | CH <sub>3</sub> CN/H <sub>2</sub> O(3:2)  | -                               | 34%   |
| 48 <sup>m</sup>  | eosin Y                                | Ag <sub>2</sub> O | K <sub>2</sub> S <sub>2</sub> O <sub>8</sub>                  | CH <sub>3</sub> CN/H <sub>2</sub> O(3:2)  | -                               | NR    |

<sup>a</sup>Reaction conditions: **1a** (0.1 mmol), **2a** (0.2 mmol), AgX (10 mol%), photocatalyst (3 mol%, 26 W household light), oxidant (0.2 mmol, 2 equiv), additive (1.0 equiv), solvent (1.0 mL) under nitrogen for 8 h. <sup>b</sup>Isolated yield. <sup>c</sup>Under green LED. <sup>d</sup>Under red LED. <sup>e</sup>Under blue LED. <sup>f</sup>Under dark. <sup>g</sup>For Ag<sub>2</sub>O (1.0 equiv). <sup>h</sup>For Ag<sub>2</sub>O (2.0 equiv). <sup>i</sup>For no eosin Y. <sup>j</sup>For 6 h, <sup>k</sup>For 10 h, <sup>l</sup>Under air, <sup>m</sup>Under O<sub>2</sub>.

## 4. Typical Procedure for the Products

### (a) Procedure for the synthesis of **3**:

A 20 mL Schlenk tube was equipped with a magnetic stir bar and charged with 8-hydroxyquinoline ester **1** (0.1 mmol), diarylphosphine oxide **2** (0.2 mmol), eosin Y (2.1 mg, 0.003 mmol, 3 mol%), K<sub>2</sub>S<sub>2</sub>O<sub>8</sub> (0.2 mmol, 2 equiv), Ag<sub>2</sub>O (2.3 mg, 0.01 mmol, 10 mol%) in CH<sub>3</sub>CN/H<sub>2</sub>O (3:2) (1.5 mL). The resulting mixture was stirred under the irradiation of 26 W household light under nitrogen at room temperature for 6 h. Upon completion, the mixture was added into H<sub>2</sub>O (20 mL) and extracted with CH<sub>2</sub>Cl<sub>2</sub> (20 mL) three times. The combined organic layer was dried over anhydrous Na<sub>2</sub>SO<sub>4</sub> and filtered. After evaporation of the solvent under vacuum, the residue was purified by column chromatography on silica gel (100–200 mesh) using CH<sub>2</sub>Cl<sub>2</sub>/ethyl acetate as an eluent (2:1, V/V) to afford the pure product **3**.

### (b) Procedure for the hydrolysis of **4a**:

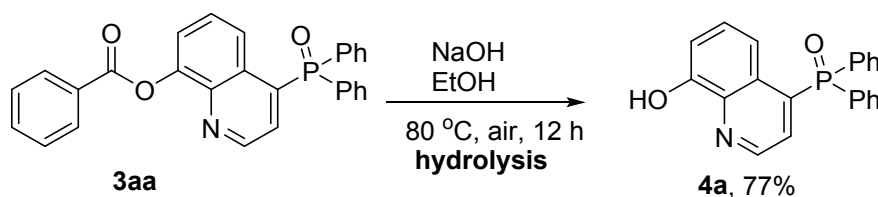

To a solution of **3aa** (0.2 mmol) in ethyl alcohol (3 mL), NaOH (0.22 mmol, 1.1 equiv) was added, and the resulting mixture was stirred at 80 °C for 12 h. The solvent was removed by vacuum, and then 3 mL H<sub>2</sub>O was added to the residue. The mixture was extracted with CH<sub>2</sub>Cl<sub>2</sub> (3 × 5 mL). The combined organic layer was dried over anhydrous Na<sub>2</sub>SO<sub>4</sub> and filtered. After evaporation of the solvent under vacuum, the residue was purified by column chromatography on silica gel (100–200 mesh) using CH<sub>2</sub>Cl<sub>2</sub>/ethyl acetate (2:1, V/V) as an eluent to afford the pure product **4a**.

## 5. Characterization Data of the Products

### 4-(diphenylphosphoryl)quinolin-8-yl benzoate (**3aa**):

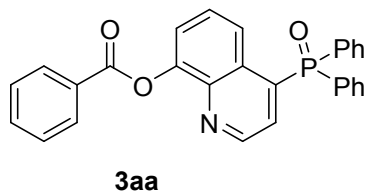

Light yellow solid (78% yield); mp 88–89 °C; <sup>1</sup>H NMR (400 MHz, CDCl<sub>3</sub>) δ: 8.85 (t, *J* = 4.0 Hz, 1H), 8.53–8.51 (m, 1H), 8.34–8.32 (m, 2H), 7.72–7.49 (m, 15H), 7.15 (dd, *J* = 15.1, 4.3 Hz, 1H); <sup>13</sup>C NMR (100 MHz, CDCl<sub>3</sub>) δ: 165.5, 149.1 (d, *J*<sub>C-P</sub> = 11.5 Hz), 148.2 (d, *J*<sub>C-P</sub> = 2.8 Hz), 141.9 (d,

$J_{C-P} = 7.1$  Hz), 138.8 (d,  $J_{C-P} = 94.3$  Hz), 133.7, 132.6 (d,  $J_{C-P} = 2.8$  Hz), 132.0 (d,  $J_{C-P} = 10.0$  Hz), 131.1 (d,  $J_{C-P} = 106.3$  Hz), 130.6, 129.4, 128.9 (d,  $J_{C-P} = 12.5$  Hz), 128.9, 128.6, 127.7, 126.7 (d,  $J_{C-P} = 9.3$  Hz), 125.7 (d,  $J_{C-P} = 5.6$  Hz), 122.2;  $^{31}\text{P}$  NMR (163 MHz,  $\text{CDCl}_3$ )  $\delta$ : 30.7; HRMS (ESI-TOF): Calcd for  $\text{C}_{28}\text{H}_{21}\text{NO}_3\text{P}$   $[\text{M}+\text{H}]^+$ : 450.1254, Found: 450.1255.

#### 4-(di-*p*-tolylphosphoryl)quinolin-8-yl benzoate (**3ab**):

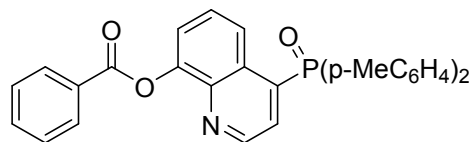

**3ab**

Light yellow solid (66% yield); mp 194–195 °C;  $^1\text{H}$  NMR (400 MHz,  $\text{CDCl}_3$ )  $\delta$ : 8.84 (t,  $J = 3.8$  Hz, 1H), 8.53 (d,  $J = 7.9$  Hz, 1H), 8.33 (d,  $J = 7.6$  Hz, 2H), 7.67–7.63 (m, 1H), 7.59–7.51 (m, 8H), 7.31–7.29 (m, 4H), 7.15 (dd,  $J = 14.8, 4.2$  Hz, 1H), 2.42 (s, 6H);  $^{13}\text{C}$  NMR (100 MHz,  $\text{CDCl}_3$ )  $\delta$ : 165.5, 149.1 (d,  $J_{C-P} = 11.5$  Hz), 148.1 (d,  $J_{C-P} = 2.6$  Hz), 143.2 (d,  $J_{C-P} = 2.8$  Hz), 141.9 (d,  $J_{C-P} = 7.0$  Hz), 139.2 (d,  $J_{C-P} = 93.9$  Hz), 133.7, 132.0 (d,  $J_{C-P} = 10.4$  Hz), 130.6, 129.7 (d,  $J_{C-P} = 12.7$  Hz), 129.3 (d,  $J_{C-P} = 8.0$  Hz), 129.0 (d,  $J_{C-P} = 6.8$  Hz), 128.6, 127.9 (d,  $J_{C-P} = 107.8$  Hz), 127.6, 126.7 (d,  $J_{C-P} = 9.4$  Hz), 125.8 (d,  $J_{C-P} = 5.5$  Hz), 122.2, 21.7;  $^{31}\text{P}$  NMR (163 MHz,  $\text{CDCl}_3$ )  $\delta$ : 31.1; HRMS (ESI-TOF): Calcd for  $\text{C}_{30}\text{H}_{25}\text{NO}_3\text{P}$   $[\text{M}+\text{H}]^+$ : 478.1567, Found: 478.1569.

#### 4-(bis(3,5-dimethylphenyl)phosphoryl)quinolin-8-yl benzoate (**3ac**):

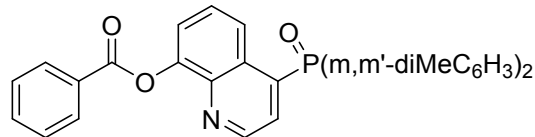

**3ac**

Light yellow solid (53% yield); mp 109–110 °C;  $^1\text{H}$  NMR (400 MHz,  $\text{CDCl}_3$ )  $\delta$ : 8.85 (t,  $J = 3.9$  Hz, 1H), 8.56–8.54 (m, 1H), 8.35–8.32 (m, 2H), 7.68–7.64 (m, 1H), 7.58–7.53 (m, 4H), 7.29 (d,  $J = 12.6$  Hz, 4H), 7.21 (s, 2H), 7.16 (dd,  $J = 14.8, 4.2$  Hz, 1H), 2.33 (s, 12H);  $^{13}\text{C}$  NMR (100 MHz,  $\text{CDCl}_3$ )  $\delta$ : 165.5, 149.1 (d,  $J_{C-P} = 11.5$  Hz), 148.1 (d,  $J_{C-P} = 2.5$  Hz), 141.9 (d,  $J_{C-P} = 7.1$  Hz), 139.3 (d,  $J_{C-P} = 92.7$  Hz), 138.6 (d,  $J_{C-P} = 13.0$  Hz), 134.4 (d,  $J_{C-P} = 2.8$  Hz), 133.7, 130.9 (d,  $J_{C-P} = 104.1$  Hz), 130.7, 129.5 (d,  $J_{C-P} = 10.0$  Hz), 129.4, 129.1 (d,  $J_{C-P} = 6.6$  Hz), 128.6, 127.5, 126.8 (d,  $J_{C-P} = 9.5$  Hz), 125.9 (d,  $J_{C-P} = 5.4$  Hz), 122.1, 21.4;  $^{31}\text{P}$  NMR (163 MHz,  $\text{CDCl}_3$ )  $\delta$ : 31.3; HRMS (ESI-TOF): Calcd for  $\text{C}_{32}\text{H}_{29}\text{NO}_3\text{P}$   $[\text{M}+\text{H}]^+$ : 506.1880, Found: 506.1881.

#### 4-(di-*p*-tolylphosphoryl)quinolin-8-yl 3-methylbenzoate (**3ad**):

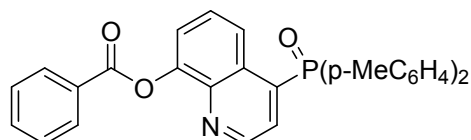

**3ad**

Light yellow solid (48% yield); mp 106–107 °C;  $^1\text{H}$  NMR (400 MHz,  $\text{CDCl}_3$ )  $\delta$ : 8.84 (t,  $J = 3.8$  Hz, 1H), 8.54–8.52 (m, 1H), 8.15–8.12 (m, 2H), 7.59–7.53 (m, 6H), 7.48–7.40 (m, 2H), 7.31–7.29 (m, 4H), 7.14 (dd,  $J = 14.8, 4.2$  Hz, 1H), 2.45 (s, 3H), 2.42 (s, 6H);  $^{13}\text{C}$  NMR (100 MHz,  $\text{CDCl}_3$ )  $\delta$ : 165.6, 149.1 (d,  $J_{\text{C-P}} = 11.3$  Hz), 148.2 (d,  $J_{\text{C-P}} = 2.7$  Hz), 143.1 (d,  $J_{\text{C-P}} = 2.7$  Hz), 141.9 (d,  $J_{\text{C-P}} = 7.0$  Hz), 139.3 (d,  $J_{\text{C-P}} = 93.7$  Hz), 138.4, 134.5, 132.0 (d,  $J_{\text{C-P}} = 10.3$  Hz), 131.0, 129.6 (d,  $J_{\text{C-P}} = 12.8$  Hz), 129.3, 129.0 (d,  $J_{\text{C-P}} = 6.6$  Hz), 128.5, 127.7, 127.5, 127.5, 126.6 (d,  $J_{\text{C-P}} = 9.3$  Hz), 125.8 (d,  $J_{\text{C-P}} = 5.4$  Hz), 122.1, 21.7, 21.4;  $^{31}\text{P}$  NMR (163 MHz,  $\text{CDCl}_3$ )  $\delta$ : 31.0; HRMS (ESI-TOF): Calcd for  $\text{C}_{31}\text{H}_{27}\text{NO}_3\text{P}$   $[\text{M}+\text{H}]^+$ : 492.1723, Found: 492.1724.

**4-(diphenylphosphoryl)quinolin-8-yl 2-methylbenzoate (3ba):**

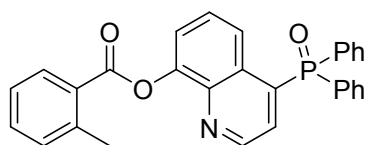

**3ba**

Light yellow solid (67% yield); mp 95–97 °C;  $^1\text{H}$  NMR (400 MHz,  $\text{CDCl}_3$ )  $\delta$ : 8.87 (t,  $J = 4.0$  Hz, 1H), 8.51–8.48 (m, 1H), 8.38–8.36 (m, 1H), 7.72–7.49 (m, 13H), 7.38–7.33 (m, 2H), 7.16 (dd,  $J = 14.9, 4.2$  Hz, 1H), 2.71 (s, 3H);  $^{13}\text{C}$  NMR (100 MHz,  $\text{CDCl}_3$ )  $\delta$ : 166.2, 149.0 (d,  $J_{\text{C-P}} = 11.3$  Hz), 148.3 (d,  $J_{\text{C-P}} = 2.8$  Hz), 142.0 (d,  $J_{\text{C-P}} = 7.2$  Hz), 141.5, 138.8 (d,  $J_{\text{C-P}} = 93.7$  Hz), 132.8, 132.6 (d,  $J_{\text{C-P}} = 2.6$  Hz), 132.0 (d,  $J_{\text{C-P}} = 10.0$  Hz), 131.9, 131.7, 131.2 (d,  $J_{\text{C-P}} = 105.0$  Hz), 128.9 (d,  $J_{\text{C-P}} = 12.5$  Hz), 128.9, 128.6, 127.7, 126.7 (d,  $J_{\text{C-P}} = 9.4$  Hz), 126.0, 125.6 (d,  $J_{\text{C-P}} = 5.6$  Hz), 122.3, 21.9;  $^{31}\text{P}$  NMR (163 MHz,  $\text{CDCl}_3$ )  $\delta$ : 30.6; HRMS (ESI-TOF) Calcd for  $\text{C}_{29}\text{H}_{23}\text{NO}_3\text{P}$   $[\text{M}+\text{H}]^+$ : 464.1410, Found: 464.1413.

**4-(diphenylphosphoryl)quinolin-8-yl 3-methylbenzoate (3ca):**

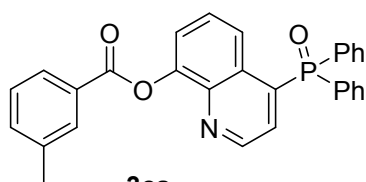

**3ca**

Light yellow solid (68% yield); mp 116–118 °C;  $^1\text{H}$  NMR (400 MHz,  $\text{CDCl}_3$ )  $\delta$ : 8.85 (t,  $J = 4.0$  Hz, 1H), 8.53–8.50 (m, 1H), 8.15–8.12 (m, 2H), 7.72–7.41 (m, 15H), 7.15 (dd,  $J = 14.9, 4.2$  Hz, 1H), 2.46 (s, 3H);  $^{13}\text{C}$  NMR (100 MHz,  $\text{CDCl}_3$ )  $\delta$ : 165.6, 149.1 (d,  $J_{\text{C-P}} = 11.4$  Hz), 148.2 (d,  $J_{\text{C-P}} = 2.7$  Hz), 142.0 (d,  $J_{\text{C-P}} = 7.3$  Hz), 138.8 (d,  $J_{\text{C-P}} = 94.0$  Hz), 138.5, 134.5, 132.6 (d,  $J_{\text{C-P}} = 2.7$  Hz), 132.0 (d,  $J_{\text{C-P}} = 10.0$  Hz), 131.2 (d,  $J_{\text{C-P}} = 105.1$  Hz), 131.0, 129.3, 128.9 (d,  $J_{\text{C-P}} = 12.5$  Hz), 128.9, 128.5, 127.7, 127.7, 126.6 (d,  $J_{\text{C-P}} = 9.5$  Hz), 125.6 (d,  $J_{\text{C-P}} = 5.5$  Hz), 122.2, 21.3;  $^{31}\text{P}$  NMR (163 MHz,  $\text{CDCl}_3$ )  $\delta$ : 30.6; HRMS (ESI-TOF) Calcd for  $\text{C}_{29}\text{H}_{23}\text{NO}_3\text{P}$   $[\text{M}+\text{H}]^+$ : 464.1410, Found: 464.1412.

**4-(diphenylphosphoryl)quinolin-8-yl 4-methylbenzoate (3da):**

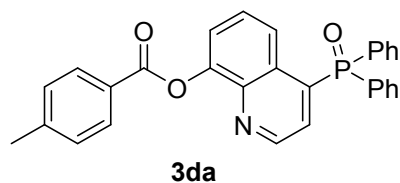

Light yellow solid (66% yield); mp 107-109 °C; <sup>1</sup>H NMR (400 MHz, CDCl<sub>3</sub>) δ: 8.85 (t, *J* = 4.0 Hz, 1H), 8.52–8.49 (m, 1H), 8.23–8.21 (m, 1H), 7.72–7.49 (m, 13H), 7.35–7.33 (m, 2H), 7.14 (dd, *J* = 14.9, 4.2 Hz, 1H), 2.47 (s, 3H); <sup>13</sup>C NMR (100 MHz, CDCl<sub>3</sub>) δ: 165.5, 149.1 (d, *J*<sub>C-P</sub> = 11.4 Hz), 148.3 (d, *J*<sub>C-P</sub> = 3.2 Hz), 144.5, 142.0 (d, *J*<sub>C-P</sub> = 7.0 Hz), 138.7 (d, *J*<sub>C-P</sub> = 94.1 Hz), 132.6 (d, *J*<sub>C-P</sub> = 2.3 Hz), 132.0 (d, *J*<sub>C-P</sub> = 10.0 Hz), 131.2 (d, *J*<sub>C-P</sub> = 108.4 Hz), 129.4, 128.9 (d, *J*<sub>C-P</sub> = 12.4 Hz), 127.7, 126.7, 126.6, 126.6, 125.6 (d, *J*<sub>C-P</sub> = 5.4 Hz), 122.3, 21.8; <sup>31</sup>P NMR (163 MHz, CDCl<sub>3</sub>) δ: 30.6; HRMS (ESI-TOF) Calcd for C<sub>29</sub>H<sub>23</sub>NO<sub>3</sub>P [M+H]<sup>+</sup>: 464.1410, Found: 464.1413.

**4-(diphenylphosphoryl)quinolin-8-yl 2-methoxybenzoate (3ea):**

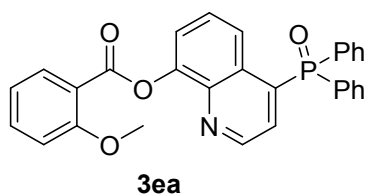

Light yellow solid (58% yield); mp 86–87 °C; <sup>1</sup>H NMR (400 MHz, CDCl<sub>3</sub>) δ: 8.87 (t, *J* = 4.0 Hz, 1H), 8.48 (d, *J* = 8.2 Hz, 1H), 8.32–8.29 (m, 1H), 7.71–7.48 (m, 13H), 7.15 (dd, *J* = 15.0, 4.2 Hz, 1H), 7.10–7.04 (m, 2H), 3.93 (s, 3H); <sup>13</sup>C NMR (100 MHz, CDCl<sub>3</sub>) δ: 164.2, 160.3, 149.0 (d, *J*<sub>C-P</sub> = 11.4 Hz), 148.2 (d, *J*<sub>C-P</sub> = 2.8 Hz), 142.1 (d, *J*<sub>C-P</sub> = 7.2 Hz), 139.1, 138.1, 134.85, 132.9, 132.6 (d, *J*<sub>C-P</sub> = 2.6 Hz), 132.0 (d, *J*<sub>C-P</sub> = 10.1 Hz), 132.0, 131.2 (d, *J*<sub>C-P</sub> = 105.1 Hz), 128.9 (d, *J*<sub>C-P</sub> = 12.3 Hz), 128.8, 127.6, 126.6 (d, *J*<sub>C-P</sub> = 9.4 Hz), 125.4 (d, *J*<sub>C-P</sub> = 5.4 Hz), 122.4, 119.5 (d, *J*<sub>C-P</sub> = 161.4 Hz), 112.3, 56.1; <sup>31</sup>P NMR (163 MHz, CDCl<sub>3</sub>) δ: 30.7; HRMS (ESI-TOF) Calcd for C<sub>29</sub>H<sub>23</sub>NO<sub>4</sub>P [M+H]<sup>+</sup>: 480.1359, Found: 480.1362.

**4-(diphenylphosphoryl)quinolin-8-yl 4-methoxybenzoate (3fa):**

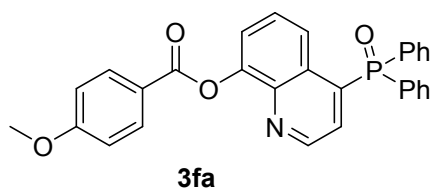

Light yellow solid (61% yield); mp 208–209 °C; <sup>1</sup>H NMR (400 MHz, CDCl<sub>3</sub>) δ: 8.85 (t, *J* = 4.0 Hz, 1H), 8.51–8.49 (m, 1H), 8.29–8.27 (m, 2H), 7.71–7.66 (m, 4H), 7.62–7.48 (m, 8H), 7.14 (dd, *J* = 15.0, 4.2 Hz, 1H), 7.03–7.00 (m, 2H), 3.90 (s, 3H); <sup>13</sup>C NMR (100 MHz, CDCl<sub>3</sub>) δ: 165.2, 164.0, 148.7 (d, *J*<sub>C-P</sub> = 11.5 Hz), 148.3 (d, *J*<sub>C-P</sub> = 2.9 Hz), 142.1 (d, *J*<sub>C-P</sub> = 7.2 Hz), 139.2, 138.3, 132.7, 132.6 (d, *J*<sub>C-P</sub> = 2.7 Hz), 132.0 (d, *J*<sub>C-P</sub> = 10.0 Hz), 131.9 (d, *J*<sub>C-P</sub> = 105.2 Hz), 128.9 (d, *J*<sub>C-P</sub> = 12.4 Hz), 127.7, 126.6 (d, *J*<sub>C-P</sub> = 9.4 Hz), 125.5 (d, *J*<sub>C-P</sub> = 5.4 Hz), 122.0 (d, *J*<sub>C-P</sub> = 63.4 Hz), 55.6; <sup>31</sup>P NMR (163 MHz, CDCl<sub>3</sub>) δ: 30.6; HRMS (ESI-TOF) Calcd for C<sub>29</sub>H<sub>23</sub>NO<sub>4</sub>P [M+H]<sup>+</sup>: 480.1359, Found: 480.1361.

#### 4-(diphenylphosphoryl)quinolin-8-yl 3,5-dimethoxybenzoate (3ga):

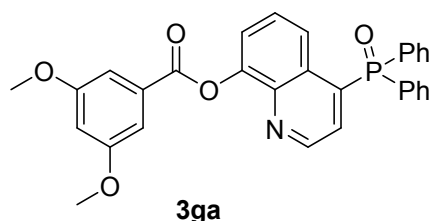

Light yellow solid (60% yield); mp 154–155 °C;  $^1\text{H}$  NMR (400 MHz,  $\text{CDCl}_3$ )  $\delta$ : 8.86 (t,  $J = 4.0$  Hz, 1H), 8.54–8.51 (m, 1H), 7.72–7.67 (m, 4H), 7.63–7.49 (m, 8H), 7.48 (s, 1H), 7.47 (s, 1H), 7.15 (dd,  $J = 14.9, 4.2$  Hz, 1H), 6.75 (t,  $J = 2.4$  Hz, 1H), 3.90 (s, 6H);  $^{13}\text{C}$  NMR (100 MHz,  $\text{CDCl}_3$ )  $\delta$ : 165.2, 160.8, 149.1 (d,  $J_{\text{C-P}} = 11.4$  Hz), 148.2 (d,  $J_{\text{C-P}} = 2.8$  Hz), 141.9 (d,  $J_{\text{C-P}} = 7.2$  Hz), 139.2, 138.3, 132.6 (d,  $J_{\text{C-P}} = 2.7$  Hz), 132.0 (d,  $J_{\text{C-P}} = 10.0$  Hz), 131.1 (d,  $J_{\text{C-P}} = 105.1$  Hz), 131.1, 128.9 (d,  $J_{\text{C-P}} = 12.4$  Hz), 127.7, 126.6 (d,  $J_{\text{C-P}} = 9.4$  Hz), 125.7 (d,  $J_{\text{C-P}} = 5.4$  Hz), 122.2, 108.0, 106.7, 55.7;  $^{31}\text{P}$  NMR (163 MHz,  $\text{CDCl}_3$ )  $\delta$ : 30.6; HRMS (ESI-TOF) Calcd for  $\text{C}_{30}\text{H}_{25}\text{NO}_3\text{P}$   $[\text{M}+\text{H}]^+$ : 510.1465, Found: 510.1469.

#### 4-(diphenylphosphoryl)quinolin-8-yl 2-fluorobenzoate (3ha):

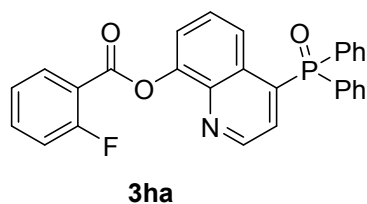

Light yellow solid (63% yield); mp 96–97 °C;  $^1\text{H}$  NMR (400 MHz,  $\text{CDCl}_3$ )  $\delta$ : 8.89 (t,  $J = 3.9$  Hz, 1H), 8.54 (d,  $J = 8.2$ , 1H), 8.32–8.28 (m, 1H), 7.73–7.68 (m, 4H), 7.65–7.58 (m, 4H), 7.56–7.51 (m, 5H), 7.35–7.31 (m, 1H), 7.26–7.23 (m, 1H), 7.18 (dd,  $J = 14.9, 4.2$  Hz, 1H);  $^{13}\text{C}$  NMR (100 MHz,  $\text{CDCl}_3$ )  $\delta$ : 163.9, 162.8 (d,  $J_{\text{C-F}} = 3.9$  Hz), 161.3, 149.1 (d,  $J_{\text{C-P}} = 11.4$  Hz), 147.8 (d,  $J_{\text{C-P}} = 2.7$  Hz), 141.7 (d,  $J_{\text{C-F}} = 7.2$  Hz), 138.8 (d,  $J_{\text{C-P}} = 93.9$  Hz), 135.3 (d,  $J_{\text{C-P}} = 9.1$  Hz), 133.0, 132.6 (d,  $J_{\text{C-P}} = 2.6$  Hz), 132.0 (d,  $J_{\text{C-P}} = 9.8$  Hz), 131.1 (d,  $J_{\text{C-P}} = 105.1$  Hz), 129.0 (d,  $J_{\text{C-P}} = 12.4$  Hz), 127.7, 126.7 (d,  $J_{\text{C-P}} = 9.4$  Hz), 125.8 (d,  $J_{\text{C-P}} = 5.4$  Hz), 124.2 (d,  $J_{\text{C-P}} = 4.0$  Hz), 122.2, 117.9 (d,  $J_{\text{C-P}} = 9.2$  Hz), 117.2 (d,  $J_{\text{C-F}} = 21.9$  Hz);  $^{31}\text{P}$  NMR (163 MHz,  $\text{CDCl}_3$ )  $\delta$ : 30.7;  $^{19}\text{F}$  NMR (376 MHz,  $\text{CDCl}_3$ )  $\delta$ : -111.912; HRMS (ESI-TOF): Calcd for  $\text{C}_{28}\text{H}_{20}\text{FNO}_3\text{P}$   $[\text{M}+\text{H}]^+$ : 468.1159, Found: 468.1159.

#### 4-(diphenylphosphoryl)quinolin-8-yl 3-fluorobenzoate (3ia):

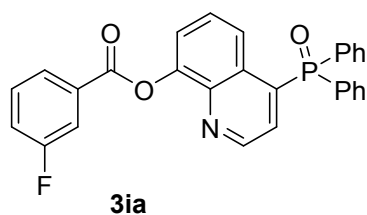

Light yellow solid (66% yield); mp 169–170 °C;  $^1\text{H}$  NMR (400 MHz,  $\text{CDCl}_3$ )  $\delta$ : 8.85 (t,  $J = 3.8$  Hz,



1H), 8.53 (d,  $J = 8.0$ , 1H), 8.11 (d,  $J = 7.7$ , 1H), 8.00 (d,  $J = 8.9$ , 1H), 7.72–7.67 (m, 4H), 7.62–7.55 (m, 3H), 7.53–7.50 (m, 6H), 7.37–7.33 (m, 1H), 7.16 (dd,  $J = 15.0$ , 4.1 Hz, 1H);  $^{13}\text{C}$  NMR (100 MHz,  $\text{CDCl}_3$ )  $\delta$ : 164.4 (d,  $J_{\text{C-F}} = 2.9$  Hz), 162.6 (d,  $J_{\text{C-F}} = 245.8$  Hz), 157.2, 149.2 (d,  $J_{\text{C-P}} = 11.5$  Hz), 147.9 (d,  $J_{\text{C-P}} = 3.0$  Hz), 141.7 (d,  $J_{\text{C-F}} = 7.2$  Hz), 138.7 (d,  $J_{\text{C-P}} = 94.1$  Hz), 132.7 (d,  $J_{\text{C-P}} = 2.7$  Hz), 132.0 (d,  $J_{\text{C-P}} = 10.1$  Hz), 130.9 (d,  $J_{\text{C-P}} = 105.3$  Hz), 130.3 (d,  $J_{\text{C-P}} = 7.7$  Hz), 129.0 (d,  $J_{\text{C-P}} = 12.4$  Hz), 127.7, 126.8 (d,  $J_{\text{C-P}} = 9.4$  Hz), 126.3 (d,  $J_{\text{C-F}} = 3.0$  Hz), 125.9 (d,  $J_{\text{C-P}} = 5.5$  Hz), 122.2, 120.8 (d,  $J_{\text{C-P}} = 21.1$  Hz), 117.4 (d,  $J_{\text{C-F}} = 23.0$  Hz), 115.6;  $^{31}\text{P}$  NMR (163 MHz,  $\text{CDCl}_3$ )  $\delta$ : 31.0;  $^{19}\text{F}$  NMR (376 MHz,  $\text{CDCl}_3$ )  $\delta$ : -108.038; HRMS (ESI-TOF): Calcd for  $\text{C}_{28}\text{H}_{20}\text{FNO}_3\text{P}$   $[\text{M}+\text{H}]^+$ : 468.1159, Found: 468.1163.

#### 4-(diphenylphosphoryl)quinolin-8-yl 4-fluorobenzoate (3ja):

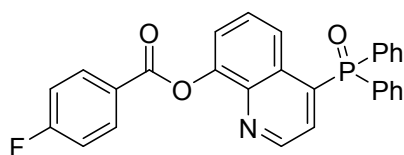

**3ja**

Light yellow solid (65% yield); mp 86–87 °C;  $^1\text{H}$  NMR (400 MHz,  $\text{CDCl}_3$ )  $\delta$ : 8.87 (t,  $J = 3.9$  Hz, 1H), 8.54 (d,  $J = 7.3$ , 1H), 8.38–8.34 (m, 2H), 7.74–7.69 (m, 4H), 7.64–7.58 (m, 4H), 7.56–7.51 (m, 5H), 7.28–7.25 (m, 1H), 7.17 (dd,  $J = 14.9$ , 4.2 Hz, 1H);  $^{13}\text{C}$  NMR (100 MHz,  $\text{CDCl}_3$ )  $\delta$ : 167.5, 165.0, 164.5, 149.1 (d,  $J_{\text{C-P}} = 11.3$  Hz), 148.0 (d,  $J_{\text{C-P}} = 2.5$  Hz), 141.8 (d,  $J_{\text{C-F}} = 7.1$  Hz), 138.8 (d,  $J_{\text{C-P}} = 93.8$  Hz), 133.2 (d,  $J_{\text{C-P}} = 9.4$  Hz), 132.6 (d,  $J_{\text{C-P}} = 2.4$  Hz), 132.0 (d,  $J_{\text{C-P}} = 9.9$  Hz), 131.1 (d,  $J_{\text{C-P}} = 105.2$  Hz), 129.0 (d,  $J_{\text{C-P}} = 12.3$  Hz), 127.7, 126.7 (d,  $J_{\text{C-P}} = 9.4$  Hz), 125.8 (d,  $J_{\text{C-P}} = 5.4$  Hz), 125.6 (d,  $J_{\text{C-P}} = 2.8$  Hz), 122.2, 115.9 (d,  $J_{\text{C-P}} = 21.9$  Hz);  $^{31}\text{P}$  NMR (163 MHz,  $\text{CDCl}_3$ )  $\delta$ : 30.7;  $^{19}\text{F}$  NMR (376 MHz,  $\text{CDCl}_3$ )  $\delta$ : -104.355; HRMS (ESI-TOF): Calcd for  $\text{C}_{28}\text{H}_{20}\text{FNO}_3\text{P}$   $[\text{M}+\text{H}]^+$ : 468.1159, Found: 468.1161.

#### 4-(diphenylphosphoryl)quinolin-8-yl 2-chlorobenzoate (3ka):

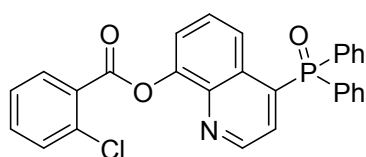

**3ka**

Light yellow (66% yield); mp 99–100 °C;  $^1\text{H}$  NMR (400 MHz,  $\text{CDCl}_3$ )  $\delta$ : 8.88 (t,  $J = 4.0$  Hz, 1H), 8.52 (d,  $J = 8.4$  Hz, 1H), 8.37–8.34 (m, 1H), 7.72–7.67 (m, 4H), 7.62–7.58 (m, 3H), 7.56–7.48 (m, 7H), 7.44–7.40 (m, 1H), 7.18 (dd,  $J = 14.9$ , 4.2 Hz, 1H);  $^{13}\text{C}$  NMR (100 MHz,  $\text{CDCl}_3$ )  $\delta$ : 163.6, 149.1 (d,  $J_{\text{C-P}} = 11.5$  Hz), 147.8 (d,  $J_{\text{C-P}} = 2.8$  Hz), 141.7 (d,  $J_{\text{C-P}} = 7.2$  Hz), 138.8 (d,  $J_{\text{C-P}} = 93.9$  Hz), 134.8, 133.3, 132.7 (d,  $J_{\text{C-P}} = 2.0$  Hz), 132.6, 132.0 (d,  $J_{\text{C-P}} = 9.9$  Hz), 131.4, 131.1 (d,  $J_{\text{C-P}} = 105.1$  Hz), 129.0 (d,  $J_{\text{C-P}} = 12.4$  Hz), 128.9, 127.6, 126.8, 126.8, 126.7 (d,  $J_{\text{C-P}} = 9.5$  Hz), 125.8 (d,  $J_{\text{C-P}} = 5.4$  Hz), 122.2;  $^{31}\text{P}$  NMR (163 MHz,  $\text{CDCl}_3$ )  $\delta$ : 30.6; HRMS (ESI-TOF): Calcd for  $\text{C}_{28}\text{H}_{20}\text{ClNO}_3\text{P}$   $[\text{M}+\text{H}]^+$ : 484.0864, Found: 484.0867.

#### 4-(diphenylphosphoryl)quinolin-8-yl 3-chlorobenzoate (3la):

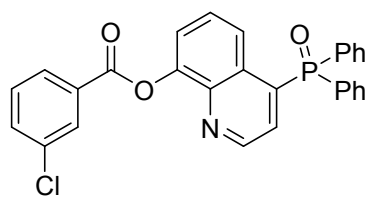

**3la**

Light yellow solid (65% yield); mp 108–110 °C;  $^1\text{H}$  NMR (400 MHz,  $\text{CDCl}_3$ )  $\delta$ : 8.85 (t,  $J$  = 4.0 Hz, 1H), 8.55–8.52 (m, 1H), 8.32–8.31 (m, 1H), 8.22–8.19 (m, 1H), 7.72–7.67 (m, 4H), 7.65–7.58 (m, 3H), 7.56–7.47 (m, 7H), 7.15 (dd,  $J$  = 14.9, 4.2 Hz, 1H);  $^{13}\text{C}$  NMR (100 MHz,  $\text{CDCl}_3$ )  $\delta$ : 164.2, 149.2 (d,  $J_{\text{C-P}}$  = 11.3 Hz), 147.9 (d,  $J_{\text{C-P}}$  = 2.9 Hz), 141.7 (d,  $J_{\text{C-P}}$  = 7.0 Hz), 139.0 (d,  $J_{\text{C-P}}$  = 93.7 Hz), 133.7, 132.6 (d,  $J_{\text{C-P}}$  = 2.6 Hz), 132.0 (d,  $J_{\text{C-P}}$  = 10.0 Hz), 131.5, 131.2, 131.1 (d,  $J_{\text{C-P}}$  = 105.1 Hz), 130.3, 130.2 (d,  $J_{\text{C-P}}$  = 3.7 Hz), 129.3, 129.0 (d,  $J_{\text{C-P}}$  = 12.3 Hz), 127.7, 127.5 (d,  $J_{\text{C-P}}$  = 3.9 Hz), 126.7 (d,  $J_{\text{C-P}}$  = 9.4 Hz), 126.0 (d,  $J_{\text{C-P}}$  = 5.5 Hz), 122.1;  $^{31}\text{P}$  NMR (163 MHz,  $\text{CDCl}_3$ )  $\delta$ : 30.5; HRMS (ESI-TOF): Calcd for  $\text{C}_{28}\text{H}_{20}\text{ClNO}_3\text{P}$   $[\text{M}+\text{H}]^+$ : 484.0864, Found: 484.0866.

**4-(diphenylphosphoryl)quinolin-8-yl 4-chlorobenzoate (3ma):**

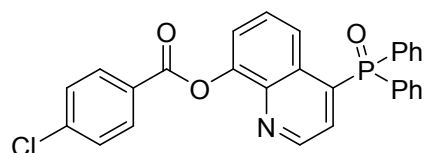

**3ma**

Light yellow solid (63% yield); mp 106–107 °C;  $^1\text{H}$  NMR (400 MHz,  $\text{CDCl}_3$ )  $\delta$ : 8.84 (t,  $J$  = 3.9 Hz, 1H), 8.54–8.52 (m, 1H), 8.28–8.25 (m, 2H), 7.72–7.67 (m, 4H), 7.63–7.58 (m, 2H), 7.57–7.56 (m, 1H), 7.54–7.49 (m, 7H), 7.15 (dd,  $J$  = 14.9, 4.2 Hz, 1H);  $^{13}\text{C}$  NMR (100 MHz,  $\text{CDCl}_3$ )  $\delta$ : 164.6, 149.1 (d,  $J_{\text{C-P}}$  = 11.5 Hz), 148.0 (d,  $J_{\text{C-P}}$  = 2.9 Hz), 141.8 (d,  $J_{\text{C-P}}$  = 7.1 Hz), 140.2, 138.9 (d,  $J_{\text{C-P}}$  = 93.6 Hz), 132.6 (d,  $J_{\text{C-P}}$  = 2.8 Hz), 132.1, 132.0 (d,  $J_{\text{C-P}}$  = 1.8 Hz), 131.1 (d,  $J_{\text{C-P}}$  = 105.1 Hz), 129.0, 129.0, 128.9, 127.9, 127.6, 126.7 (d,  $J_{\text{C-P}}$  = 9.5 Hz), 125.8 (d,  $J_{\text{C-P}}$  = 5.5 Hz), 122.2;  $^{31}\text{P}$  NMR (163 MHz,  $\text{CDCl}_3$ )  $\delta$ : 30.6; HRMS (ESI-TOF): Calcd for  $\text{C}_{28}\text{H}_{20}\text{ClNO}_3\text{P}$   $[\text{M}+\text{H}]^+$ : 484.0864, Found: 484.0865.

**4-(diphenylphosphoryl)quinolin-8-yl 3-bromobenzoate (3na):**

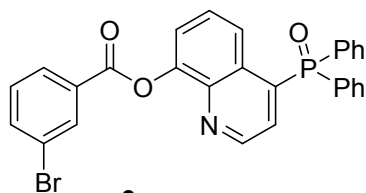

**3na**

Light yellow solid (49% yield); mp 108–109 °C;  $^1\text{H}$  NMR (400 MHz,  $\text{CDCl}_3$ )  $\delta$ : 8.84 (t,  $J$  = 4.0 Hz, 1H), 8.55–8.53 (m, 1H), 8.47–8.46 (m, 1H), 8.26–8.23 (m, 1H), 7.79–7.76 (m, 1H), 7.72–7.67 (m, 4H), 7.62–7.58 (m, 2H), 7.56 (m, 1H), 7.54–7.49 (m, 5H), 7.42 (t,  $J$  = 7.9 Hz, 1H), 7.16 (dd,  $J$  = 14.9, 4.2 Hz, 1H);  $^{13}\text{C}$  NMR (100 MHz,  $\text{CDCl}_3$ )  $\delta$ : 164.1, 149.1 (d,  $J_{\text{C-P}}$  = 11.5 Hz), 147.9 (d,  $J_{\text{C-P}}$  = 2.8 Hz), 141.7 (d,  $J_{\text{C-P}}$  = 7.2 Hz), 138.9 (d,  $J_{\text{C-P}}$  = 93.8 Hz), 136.6, 133.5, 132.6 (d,  $J_{\text{C-P}}$  = 2.6

Hz), 132.0 (d,  $J_{C-P} = 9.9$  Hz), 131.3, 131.1 (d,  $J_{C-P} = 105.1$  Hz), 130.2, 129.1, 129.0 (d,  $J_{C-P} = 12.3$  Hz), 129.0, 127.6, 126.7 (d,  $J_{C-P} = 9.4$  Hz), 125.9 (d,  $J_{C-P} = 5.5$  Hz), 122.7, 122.1;  $^{31}\text{P}$  NMR (163 MHz,  $\text{CDCl}_3$ )  $\delta$ : 30.6; HRMS (ESI-TOF): Calcd for  $\text{C}_{28}\text{H}_{20}\text{BrNO}_3\text{P}$   $[\text{M}+\text{H}]^+$ : 528.0359, Found: 528.0360.

**4-(diphenylphosphoryl)quinolin-8-yl 4-bromobenzoate (30a):**

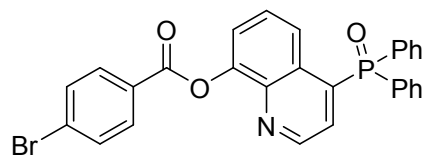

**30a**

Light yellow solid (54% yield); mp 101-102 °C;  $^1\text{H}$  NMR (400 MHz,  $\text{CDCl}_3$ )  $\delta$ : 8.84 (t,  $J = 3.9$  Hz, 1H), 8.54–8.52 (m, 1H), 8.19-8.17 (m, 2H), 7.72–7.67 (m, 7H), 7.63–7.58 (m, 2H), 7.56 (m, 1H), 7.54–7.49 (m, 5H), 7.15 (dd,  $J = 14.9, 4.2$  Hz, 1H);  $^{13}\text{C}$  NMR (100 MHz,  $\text{CDCl}_3$ )  $\delta$ : 164.8 149.1 (d,  $J_{C-P} = 11.3$  Hz), 148.0 (d,  $J_{C-P} = 2.7$  Hz), 141.7 (d,  $J_{C-P} = 7.2$  Hz), 138.8 (d,  $J_{C-P} = 93.9$  Hz), 132.6 (d,  $J_{C-P} = 2.8$  Hz), 132.1, 132.0, 132.0, 131.0 (d,  $J_{C-P} = 105.1$  Hz), 129.0, 129.0, 128.9, 128.3, 127.7, 126.7 (d,  $J_{C-P} = 9.4$  Hz), 125.8 (d,  $J_{C-P} = 5.6$  Hz), 122.1;  $^{31}\text{P}$  NMR (163 MHz,  $\text{CDCl}_3$ )  $\delta$ : 30.7; HRMS (ESI-TOF): Calcd for  $\text{C}_{28}\text{H}_{20}\text{BrNO}_3\text{P}$   $[\text{M}+\text{H}]^+$ : 528.0359, Found: 528.0359.

**4-(diphenylphosphoryl)quinolin-8-yl 2-iodobenzoate (3pa):**

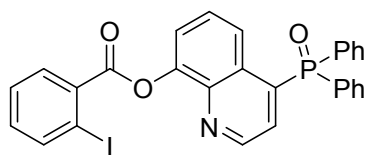

**3pa**

Light yellow solid (45% yield); mp 80–81 °C;  $^1\text{H}$  NMR (400 MHz,  $\text{CDCl}_3$ )  $\delta$ : 8.90 (t,  $J = 3.9$  Hz, 1H), 8.52 (d,  $J = 2.1$ , 1H), 8.42-8.39 (m, 1H), 8.12 (d,  $J = 7.8$ , 1H), 7.74-7.69 (m, 4H), 7.65–7.61 (m, 3H), 7.58-7.52 (m, 6H), 7.27–7.25 (m, 1H), 7.19 (dd,  $J = 14.9, 4.2$  Hz, 1H);  $^{13}\text{C}$  NMR (100 MHz,  $\text{CDCl}_3$ )  $\delta$ : 164.9, 149.1 (d,  $J_{C-P} = 11.3$  Hz), 147.8 (d,  $J_{C-P} = 2.7$  Hz), 141.7 (d,  $J_{C-P} = 9.3$  Hz), 138.8 (d,  $J_{C-P} = 93.7$  Hz), 133.5, 133.4, 132.6 (d,  $J_{C-P} = 2.6$  Hz), 132.4, 132.0 (d,  $J_{C-P} = 9.9$  Hz), 131.1 (d,  $J_{C-P} = 105.2$  Hz), 129.0 (d,  $J_{C-P} = 12.3$  Hz), 128.9, 128.6, 128.2, 127.6, 126.7 (d,  $J_{C-P} = 9.4$  Hz), 125.8 (d,  $J_{C-P} = 5.4$  Hz), 122.2, 95.3;  $^{31}\text{P}$  NMR (163 MHz,  $\text{CDCl}_3$ )  $\delta$ : 30.6; HRMS (ESI-TOF): Calcd for  $\text{C}_{28}\text{H}_{20}\text{INO}_3\text{P}$   $[\text{M}+\text{H}]^+$ : 476.0220, Found: 476.0218.

**4-(diphenylphosphoryl)quinolin-8-yl 4-cyanobenzoate (3qa):**

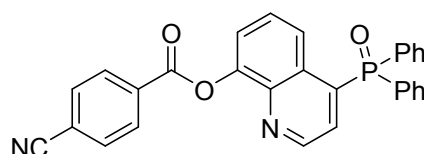

**3qa**

Light yellow solid (58% yield); mp 106–107 °C;  $^1\text{H}$  NMR (400 MHz,  $\text{CDCl}_3$ )  $\delta$ : 8.84 (t,  $J = 4.0$  Hz, 1H), 8.56–8.54 (m, 1H), 8.44–8.42 (m, 2H), 7.86–7.84 (m, 2H), 7.72–7.67 (m, 4H), 7.62–7.58 (m, 3H), 7.56–7.50 (m, 5H), 7.16 (dd,  $J = 14.9, 4.3$  Hz, 1H);  $^{13}\text{C}$  NMR (100 MHz,  $\text{CDCl}_3$ )  $\delta$ : 163.9, 149.2 (d,  $J_{\text{C-P}} = 11.5$  Hz), 147.7 (d,  $J_{\text{C-P}} = 2.8$  Hz), 141.5 (d,  $J_{\text{C-P}} = 7.2$  Hz), 139.0 (d,  $J_{\text{C-P}} = 93.5$  Hz), 133.3, 132.7 (d,  $J_{\text{C-P}} = 2.7$  Hz), 132.5, 132.0 (d,  $J_{\text{C-P}} = 10.0$  Hz), 131.0, 130.9 (d,  $J_{\text{C-P}} = 105.3$  Hz), 129.0, 129.0 (d,  $J_{\text{C-P}} = 12.5$  Hz), 127.7, 126.8 (d,  $J_{\text{C-P}} = 9.4$  Hz), 126.1 (d,  $J_{\text{C-P}} = 5.6$  Hz), 122.0, 117.5 (d,  $J_{\text{C-P}} = 96.4$  Hz);  $^{31}\text{P}$  NMR (163 MHz,  $\text{CDCl}_3$ )  $\delta$ : 30.7; HRMS (ESI-TOF): Calcd for  $\text{C}_{29}\text{H}_{20}\text{N}_2\text{O}_3\text{P}$   $[\text{M}+\text{H}]^+$ : 475.1206, Found: 475.1209.

#### 4 diphenylphosphorylquinolin-8-yl 3-(trifluoromethyl)benzoate (3ra):

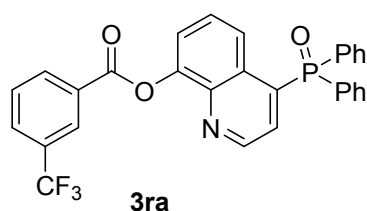

Light yellow solid (67% yield); mp 99–102 °C;  $^1\text{H}$  NMR (400 MHz,  $\text{CDCl}_3$ )  $\delta$ : 8.85 (t,  $J = 4.0$  Hz, 1H), 8.60 (s, 1H), 8.57–8.54 (m, 1H), 8.52–8.50 (m, 1H), 7.93–7.91 (m, 1H), 7.72–7.67 (m, 5H), 7.63–7.56 (m, 4H), 7.54–7.50 (m, 4H), 7.16 (dd,  $J = 14.9, 4.3$  Hz, 1H);  $^{13}\text{C}$  NMR (100 MHz,  $\text{CDCl}_3$ )  $\delta$ : 164.2, 149.2 (d,  $J_{\text{C-P}} = 11.5$  Hz), 147.9 (d,  $J_{\text{C-P}} = 2.9$  Hz), 141.7 (d,  $J_{\text{C-P}} = 7.0$  Hz), 139.0 (d,  $J_{\text{C-P}} = 93.8$  Hz), 133.7, 132.6 (d,  $J_{\text{C-P}} = 2.7$  Hz), 132.0 (d,  $J_{\text{C-P}} = 10.0$  Hz), 131.3 (q,  $J_{\text{C-F}} = 32.9$  Hz), 131.1 (d,  $J_{\text{C-P}} = 105.1$  Hz), 130.3, 130.2 (d,  $J_{\text{C-P}} = 3.6$  Hz), 129.3, 129.0 (d,  $J_{\text{C-P}} = 12.3$  Hz), 128.9, 127.7, 127.5 (d,  $J_{\text{C-P}} = 3.8$  Hz), 126.7 (d,  $J_{\text{C-P}} = 9.5$  Hz), 126.0 (q,  $J_{\text{C-F}} = 5.4$  Hz), 123.7 (q,  $J_{\text{C-F}} = 270.7$  Hz), 122.1;  $^{31}\text{P}$  NMR (163 MHz,  $\text{CDCl}_3$ )  $\delta$ : 30.6;  $^{19}\text{F}$  NMR (376 MHz,  $\text{CDCl}_3$ )  $\delta$ : -62.704; HRMS (ESI-TOF): Calcd for  $\text{C}_{29}\text{H}_{20}\text{F}_3\text{NO}_3\text{P}$   $[\text{M}+\text{H}]^+$ : 518.1127, Found: 518.1132.

#### 4-(diphenylphosphoryl)quinolin-8-yl 4-(trifluoromethyl)benzoate (3sa):

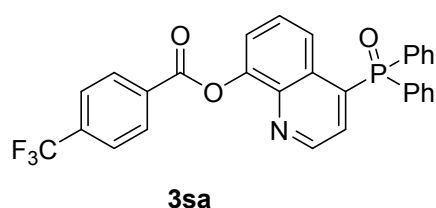

Light yellow solid (52% yield); mp 99–101 °C;  $^1\text{H}$  NMR (400 MHz,  $\text{CDCl}_3$ )  $\delta$ : 8.84 (t,  $J = 3.8$  Hz, 1H), 8.56–8.54 (m, 1H), 8.45 (d,  $J = 8.3$  Hz, 2H), 7.82 (d,  $J = 8.3$  Hz, 2H), 7.72–7.67 (m, 4H), 7.64–7.56 (m, 4H), 7.54–7.50 (m, 4H), 7.16 (dd,  $J = 14.9, 4.2$  Hz, 1H);  $^{13}\text{C}$  NMR (100 MHz,  $\text{CDCl}_3$ )  $\delta$ : 164.3, 149.1 (d,  $J_{\text{C-P}} = 11.4$  Hz), 147.9 (d,  $J_{\text{C-P}} = 2.8$  Hz), 141.6 (d,  $J_{\text{C-P}} = 7.1$  Hz), 139.0 (d,  $J_{\text{C-P}} = 93.8$  Hz), 135.3, 134.9, 132.6 (d,  $J_{\text{C-P}} = 2.7$  Hz), 132.0 (d,  $J_{\text{C-P}} = 10.0$  Hz), 131.1 (d,  $J_{\text{C-P}} = 105.1$  Hz), 130.9, 129.0 (d,  $J_{\text{C-P}} = 12.4$  Hz), 127.6, 126.7 (d,  $J_{\text{C-P}} = 9.3$  Hz), 126.0 (d,  $J_{\text{C-F}} = 5.4$  Hz), 125.7 (d,  $J_{\text{C-P}} = 3.7$  Hz), 122.1;  $^{31}\text{P}$  NMR (163 MHz,  $\text{CDCl}_3$ )  $\delta$ : 30.6;  $^{19}\text{F}$  NMR (376 MHz,  $\text{CDCl}_3$ )  $\delta$ : -63.100; HRMS (ESI-TOF): Calcd for  $\text{C}_{29}\text{H}_{20}\text{F}_3\text{NO}_3\text{P}$   $[\text{M}+\text{H}]^+$ : 518.1127, Found: 518.1133.

#### 4-(diphenylphosphoryl)-2-methylquinolin-8-yl benzoate (3ta):

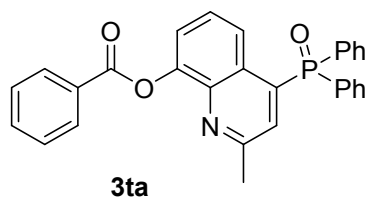

Light yellow solid (69% yield); mp 200–201 °C; <sup>1</sup>H NMR (400 MHz, CDCl<sub>3</sub>) δ: 8.37–8.31 (m, 3H), 7.72–7.64 (m, 4H), 7.61–7.48 (m, 10H), 7.45–7.41 (m, 1H), 7.12–7.08 (d, *J* = 15.4 Hz, 1H), 2.55 (s, 3H); <sup>13</sup>C NMR (100 MHz, CDCl<sub>3</sub>) δ: 165.7, 158.1 (d, *J*<sub>C-P</sub> = 11.4 Hz), 147.8 (d, *J*<sub>C-P</sub> = 3.0 Hz), 141.5 (d, *J*<sub>C-P</sub> = 7.7 Hz), 138.6 (d, *J*<sub>C-P</sub> = 94.0 Hz), 133.5, 132.6 (d, *J*<sub>C-P</sub> = 2.6 Hz), 132.0 (d, *J*<sub>C-P</sub> = 9.9 Hz), 131.3 (d, *J*<sub>C-P</sub> = 104.9 Hz), 130.5, 129.7, 128.9 (d, *J*<sub>C-P</sub> = 12.4 Hz), 128.6, 127.8 (d, *J*<sub>C-P</sub> = 9.0 Hz), 127.0 (d, *J*<sub>C-P</sub> = 7.0 Hz), 126.5, 125.3 (d, *J*<sub>C-P</sub> = 5.3 Hz), 122.0, 25.8; <sup>31</sup>P NMR (163 MHz, CDCl<sub>3</sub>) δ: 30.4; HRMS (ESI-TOF): Calcd for C<sub>29</sub>H<sub>23</sub>NO<sub>3</sub>P [M+H]<sup>+</sup>: 464.1410, Found: 464.1414.

#### 4-(diphenylphosphoryl)-2-methylquinolin-8-yl 4-methylbenzoate (3ua):

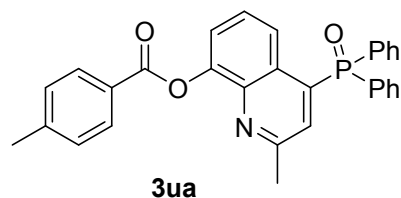

Light yellow solid (67% yield); mp 157–158 °C; <sup>1</sup>H NMR (400 MHz, CDCl<sub>3</sub>) δ: 8.35 (d, *J* = 8.4 Hz, 1H), 8.21 (d, *J* = 8.1 Hz, 2H), 7.71–7.67 (m, 4H), 7.60–7.57 (m, 2H), 7.52–7.48 (m, 5H), 7.44–7.40 (m, 1H), 7.34 (d, *J* = 8.0 Hz, 2H), 7.10 (d, *J* = 15.3 Hz, 1H), 2.54 (s, 3H), 2.47 (s, 3H); <sup>13</sup>C NMR (100 MHz, CDCl<sub>3</sub>) δ: 165.7, 158.0 (d, *J*<sub>C-P</sub> = 11.3 Hz), 147.8 (d, *J*<sub>C-P</sub> = 2.9 Hz), 144.3, 141.6 (d, *J*<sub>C-P</sub> = 7.5 Hz), 138.6 (d, *J*<sub>C-P</sub> = 93.9 Hz), 132.5 (d, *J*<sub>C-P</sub> = 2.4 Hz), 132.0 (d, *J*<sub>C-P</sub> = 9.9 Hz), 131.3 (d, *J*<sub>C-P</sub> = 104.8 Hz), 130.5, 129.3, 128.9 (d, *J*<sub>C-P</sub> = 12.3 Hz), 127.8 (d, *J*<sub>C-P</sub> = 9.0 Hz), 127.0 (d, *J*<sub>C-P</sub> = 6.7 Hz), 126.9, 126.5, 125.2 (d, *J*<sub>C-P</sub> = 5.2 Hz), 122.1, 25.8, 21.8; <sup>31</sup>P NMR (163 MHz, CDCl<sub>3</sub>) δ: 30.3; HRMS (ESI-TOF): Calcd for C<sub>30</sub>H<sub>25</sub>NO<sub>3</sub>P [M+H]<sup>+</sup>: 478.1567, Found: 478.1567.

#### 4-(diphenylphosphoryl)-2-methylquinolin-8-yl 2-methylbenzoate (3va):

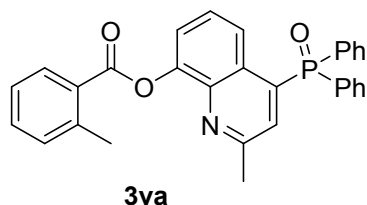

Light yellow solid (64% yield); mp 96–97 °C; <sup>1</sup>H NMR (400 MHz, CDCl<sub>3</sub>) δ: 8.34–8.32 (m, 2H), 8.72–8.67 (m, 4H), 7.62–7.58 (m, 2H), 7.52–7.48 (m, 6H), 7.45–7.41 (m, 1H), 7.38–7.33 (m, 2H), 7.12 (d, *J* = 15.3 Hz, 1H), 2.72 (s, 3H), 2.59 (s, 3H); <sup>13</sup>C NMR (100 MHz, CDCl<sub>3</sub>) δ: 166.6, 158.0 (d, *J*<sub>C-P</sub> = 11.3 Hz), 147.8 (d, *J*<sub>C-P</sub> = 2.8 Hz), 141.4 (d, *J*<sub>C-P</sub> = 7.4 Hz), 140.9, 138.6 (d, *J*<sub>C-P</sub> = 93.9 Hz), 132.5 (d, *J*<sub>C-P</sub> = 2.4 Hz), 132.5, 132.0 (d, *J*<sub>C-P</sub> = 10.0 Hz), 131.7, 131.4, 131.3 (d, *J*<sub>C-P</sub> = 104.9

Hz), 129.2, 128.9 (d,  $J_{C-P}$  = 12.2 Hz), 127.8 (d,  $J_{C-P}$  = 9.1 Hz), 127.0 (d,  $J_{C-P}$  = 7.0 Hz), 126.5, 125.9, 125.2 (d,  $J_{C-P}$  = 5.2 Hz), 122.1, 25.7, 21.6;  $^{31}\text{P}$  NMR (163 MHz,  $\text{CDCl}_3$ )  $\delta$ : 30.3; HRMS (ESI-TOF): Calcd for  $\text{C}_{30}\text{H}_{25}\text{NO}_3\text{P}$   $[\text{M}+\text{H}]^+$ : 478.1567, Found: 478.1567.

#### 4-(diphenylphosphoryl)quinolin-8-yl pivalate (3wa):

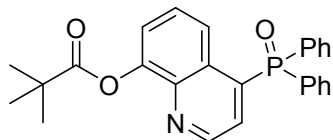

**3wa**

Light yellow solid (34% yield); mp 185–186 °C;  $^1\text{H}$  NMR (400 MHz,  $\text{CDCl}_3$ )  $\delta$ : 8.85 (t,  $J$  = 4.0 Hz, 1H), 8.44 (d,  $J$  = 8.4 Hz, 1H), 7.70–7.64 (m, 4H), 7.62–7.59 (m, 2H), 7.52–7.46 (m, 5H), 7.42–7.40 (m, 1H), 7.13 (dd,  $J$  = 15.0, 4.2 Hz, 1H), 1.49 (s, 1H);  $^{13}\text{C}$  NMR (100 MHz,  $\text{CDCl}_3$ )  $\delta$ : 177.5, 148.9 (d,  $J_{C-P}$  = 11.6 Hz), 148.4 (d,  $J_{C-P}$  = 3.0 Hz), 142.0 (d,  $J_{C-P}$  = 9.2 Hz), 138.5 (d,  $J_{C-P}$  = 93.6 Hz), 132.6 (d,  $J_{C-P}$  = 2.8 Hz), 132.0 (d,  $J_{C-P}$  = 10.1 Hz), 131.2 (d,  $J_{C-P}$  = 104.8 Hz), 128.9 (d,  $J_{C-P}$  = 12.4 Hz), 128.7, 127.6, 126.5 (d,  $J_{C-P}$  = 9.4 Hz), 125.3 (d,  $J_{C-P}$  = 5.6 Hz), 121.9, 39.3, 27.4;  $^{31}\text{P}$  NMR (163 MHz,  $\text{CDCl}_3$ )  $\delta$ : 30.7; HRMS (ESI-TOF): Calcd for  $\text{C}_{26}\text{H}_{25}\text{NO}_3\text{P}$   $[\text{M}+\text{H}]^+$ : 430.1567, Found: 430.1569.

#### 4-(diphenylphosphoryl)quinolin-8-yl 2-phenylbutanoate (3xa):

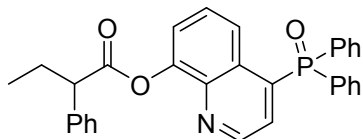

**3xa**

Light yellow solid (37% yield); mp 79–80 °C;  $^1\text{H}$  NMR (400 MHz,  $\text{CDCl}_3$ )  $\delta$ : 8.81 (t,  $J$  = 3.9 Hz, 1H), 8.42 (d,  $J$  = 8.5 Hz, 1H), 7.68–7.58 (m, 6H), 7.50–7.48 (m, 6H), 7.45–7.36 (m, 3H), 7.32–7.28 (m, 2H), 7.13 (dd,  $J$  = 14.9, 4.2 Hz, 1H), 3.97 (t,  $J$  = 7.6 Hz, 1H), 2.40–2.33 (m, 1H), 2.02–2.00 (m, 1H), 1.08 (t,  $J$  = 7.4 Hz, 3H);  $^{13}\text{C}$  NMR (100 MHz,  $\text{CDCl}_3$ )  $\delta$ : 173.0, 148.8 (d,  $J_{C-P}$  = 11.5 Hz), 148.0 (d,  $J_{C-P}$  = 2.7 Hz), 141.8 (d,  $J_{C-P}$  = 7.2 Hz), 138.7, 138.6 (d,  $J_{C-P}$  = 94.0 Hz), 132.6 (d,  $J_{C-P}$  = 2.2 Hz), 132.0 (d,  $J_{C-P}$  = 18.2 Hz), 132.0, 131.6 (d,  $J_{C-P}$  = 7.2 Hz), 130.5 (d,  $J_{C-P}$  = 7.6 Hz), 129.0, 128.9, 128.6, 128.4, 127.6, 127.4, 126.6 (d,  $J_{C-P}$  = 9.4 Hz), 125.5 (d,  $J_{C-P}$  = 5.4 Hz), 121.9, 53.2, 29.7, 27.0;  $^{31}\text{P}$  NMR (163 MHz,  $\text{CDCl}_3$ )  $\delta$ : 30.7; HRMS (ESI-TOF): Calcd for  $\text{C}_{31}\text{H}_{27}\text{NO}_3\text{P}$   $[\text{M}+\text{H}]^+$ : 492.1723, Found: 492.1727.

## 6. References

1. Truong, T.; Klimovica, K.; Daugulis, O. *J. Am. Chem. Soc.* **2013**, *135*, 9342.

## 7. The Single Crystal X-ray Diffraction Study of 3aa.

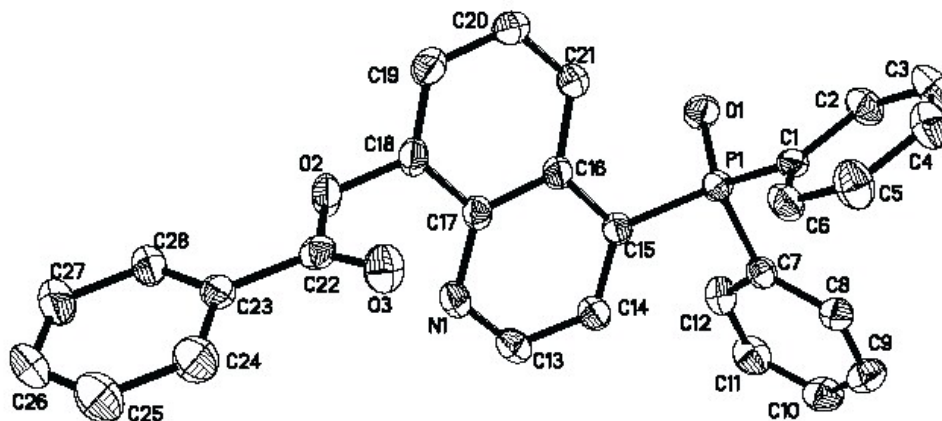

CCDC 1580532 (**3aa**) contains the supplementary crystallographic data for this paper. These data can be obtained free of charge from The Cambridge Crystallographic Data Centre *via* [www.ccdc.cam.ac.uk/data\\_request/cif](http://www.ccdc.cam.ac.uk/data_request/cif).

**Table S2** Crystal Data and Structure Refinement for **3aa**

|                                    |                                                   |
|------------------------------------|---------------------------------------------------|
| Identification code                | 20170595                                          |
| Empirical formula                  | C <sub>28</sub> H <sub>22</sub> NO <sub>4</sub> P |
| Formula weight                     | 467.43                                            |
| Temperature/K                      | 293(2)                                            |
| Crystal system                     | monoclinic                                        |
| Space group                        | P2 <sub>1</sub> /c                                |
| a/Å                                | 12.3199(11)                                       |
| b/Å                                | 22.2918(14)                                       |
| c/Å                                | 9.1023(9)                                         |
| α/°                                | 90                                                |
| β/°                                | 108.630(9)                                        |
| γ/°                                | 90                                                |
| Volume/Å <sup>3</sup>              | 2368.8(4)                                         |
| Z                                  | 4                                                 |
| ρ <sub>calc</sub> /cm <sup>3</sup> | 1.311                                             |
| μ/mm <sup>-1</sup>                 | 0.151                                             |
| F(000)                             | 976.0                                             |
| Crystal size/mm <sup>3</sup>       | 0.22 × 0.18 × 0.15                                |

|                                                  |                                                                   |
|--------------------------------------------------|-------------------------------------------------------------------|
| Radiation                                        | MoK $\alpha$ ( $\lambda = 0.71073$ )                              |
| 2 $\theta$ range for data collection/ $^{\circ}$ | 6.956 to 52.732                                                   |
| Index ranges                                     | $-15 \leq h \leq 14$ , $-27 \leq k \leq 26$ , $-6 \leq l \leq 11$ |
| Reflections collected                            | 10630                                                             |
| Independent reflections                          | 4823 [ $R_{\text{int}} = 0.0316$ , $R_{\text{sigma}} = 0.0539$ ]  |
| Data/restraints/parameters                       | 4823/0/307                                                        |
| Goodness-of-fit on $F^2$                         | 1.021                                                             |
| Final R indexes [ $I \geq 2\sigma(I)$ ]          | $R_1 = 0.0537$ , $wR_2 = 0.1154$                                  |
| Final R indexes [all data]                       | $R_1 = 0.0895$ , $wR_2 = 0.1371$                                  |
| Largest diff. peak/hole / $e \text{ \AA}^{-3}$   | 0.25/-0.29                                                        |

## 8. The Experiment of Trapping the Phosphonyl Radical

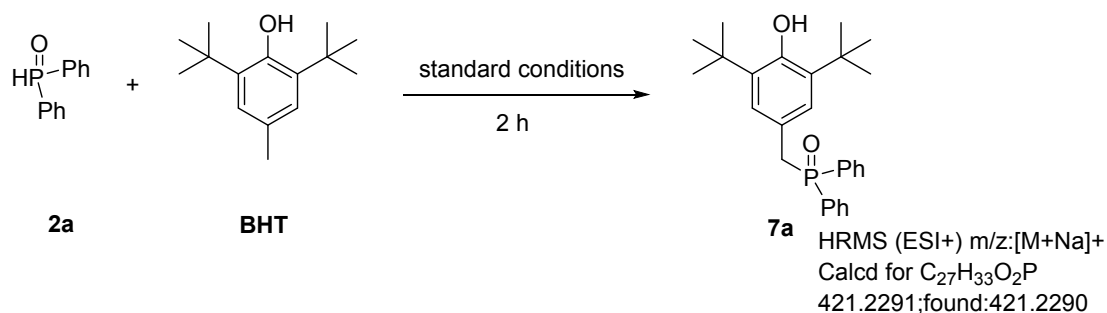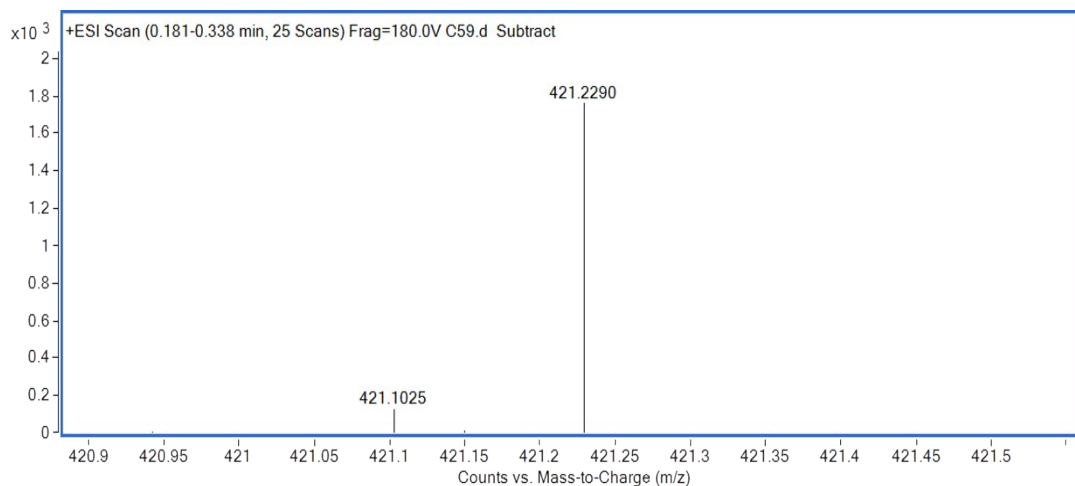

## 9. Copies of $^1\text{H}$ , $^{13}\text{C}$ and $^{31}\text{P}$ NMR Spectra for the Products



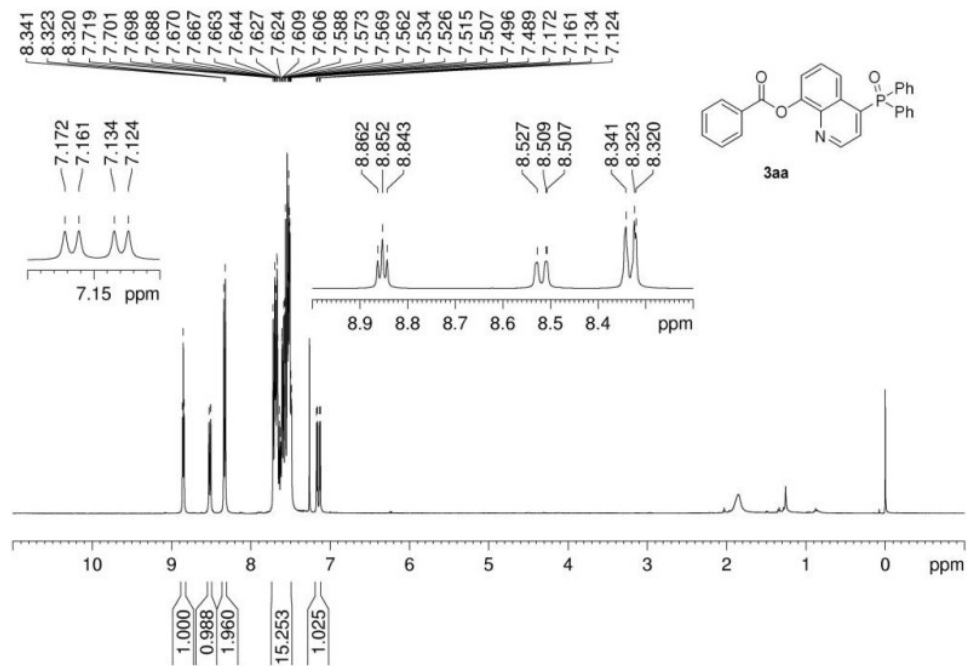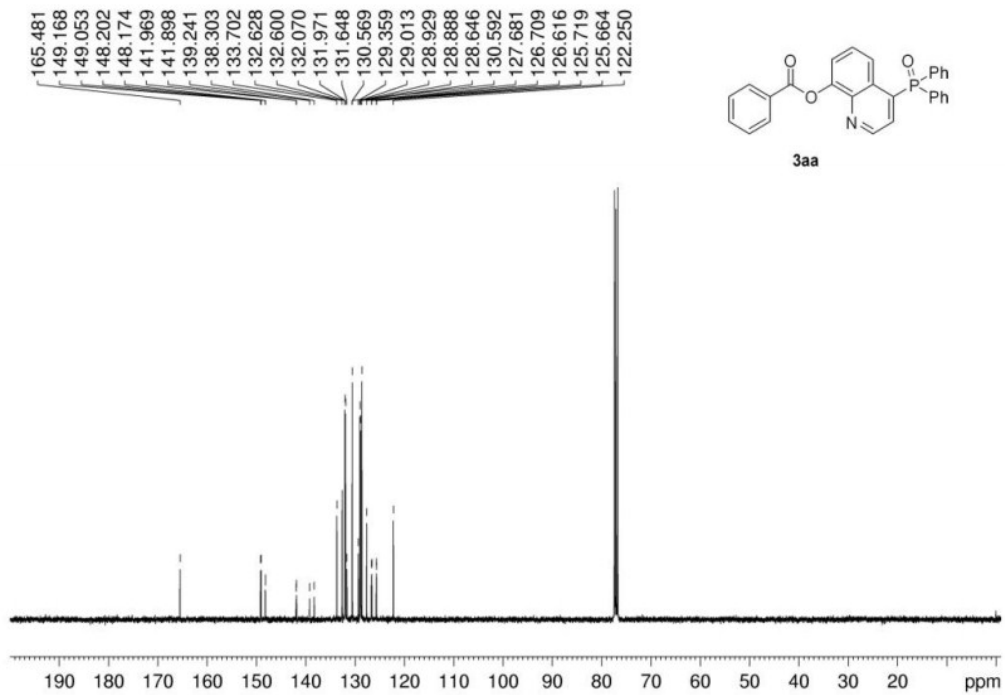

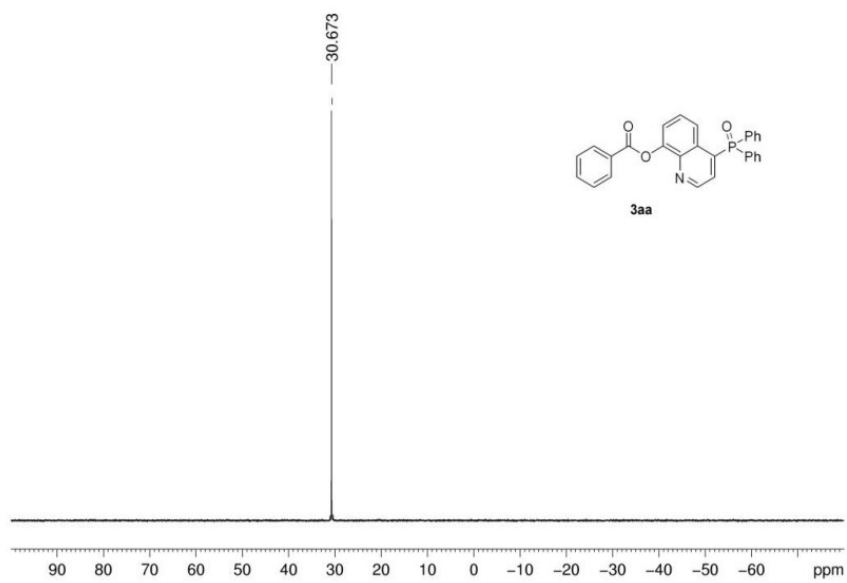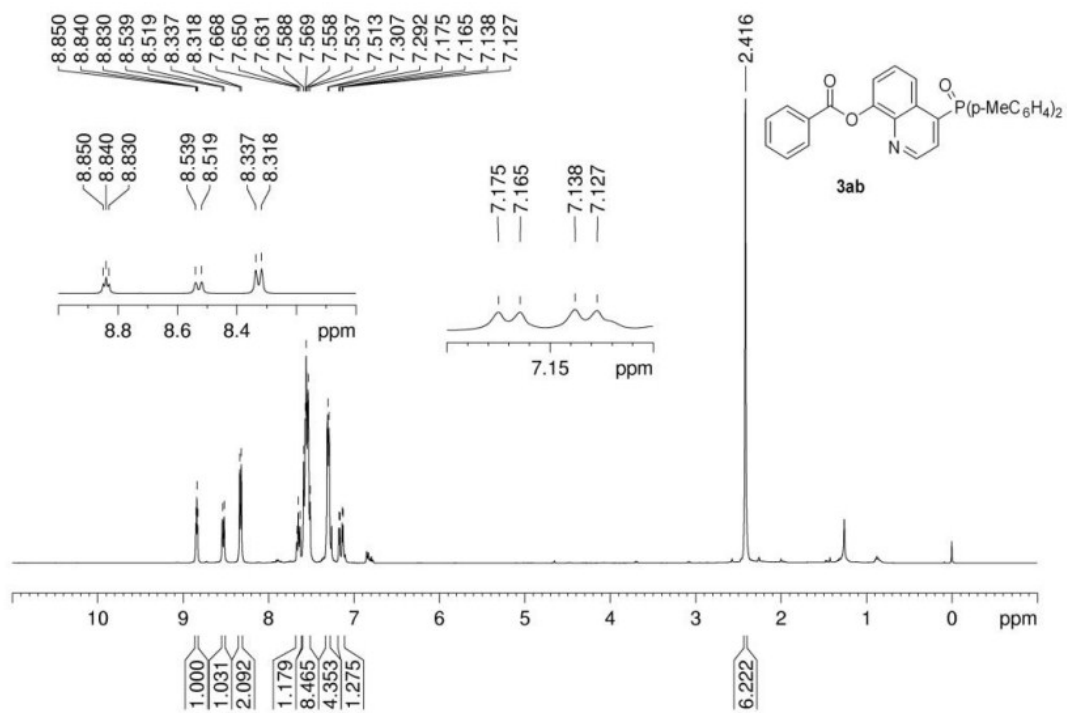

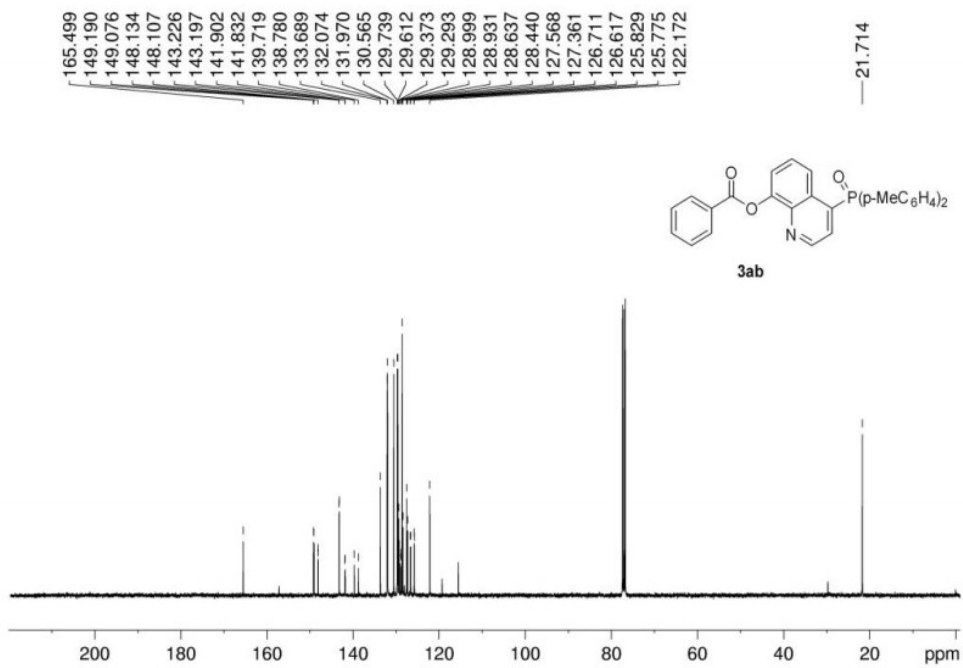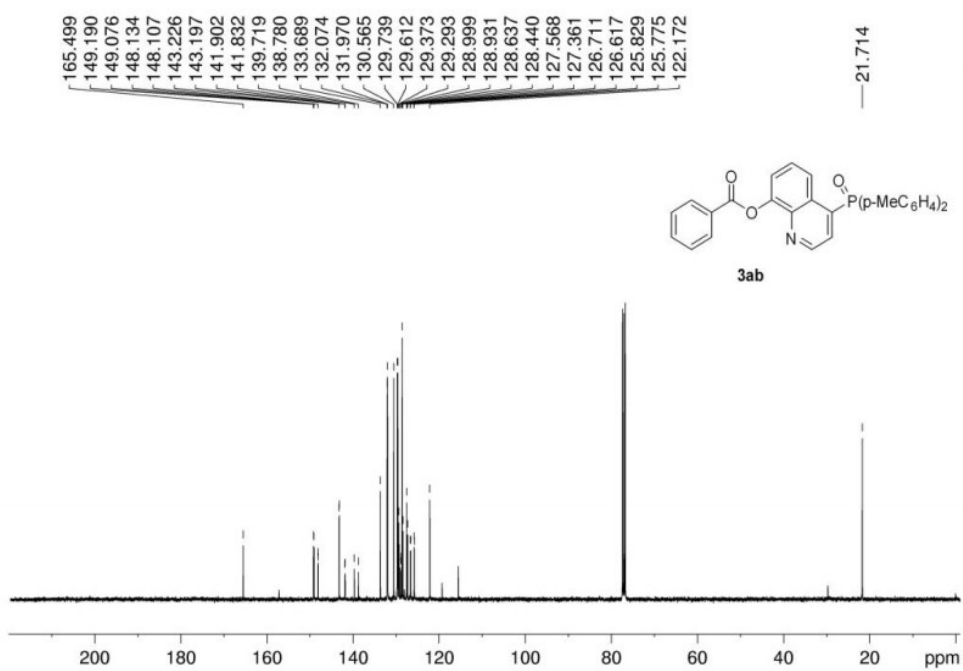

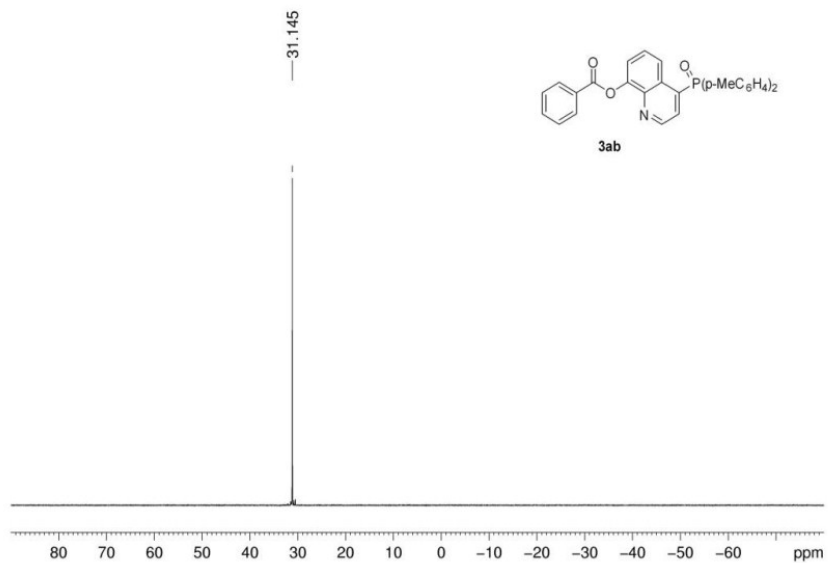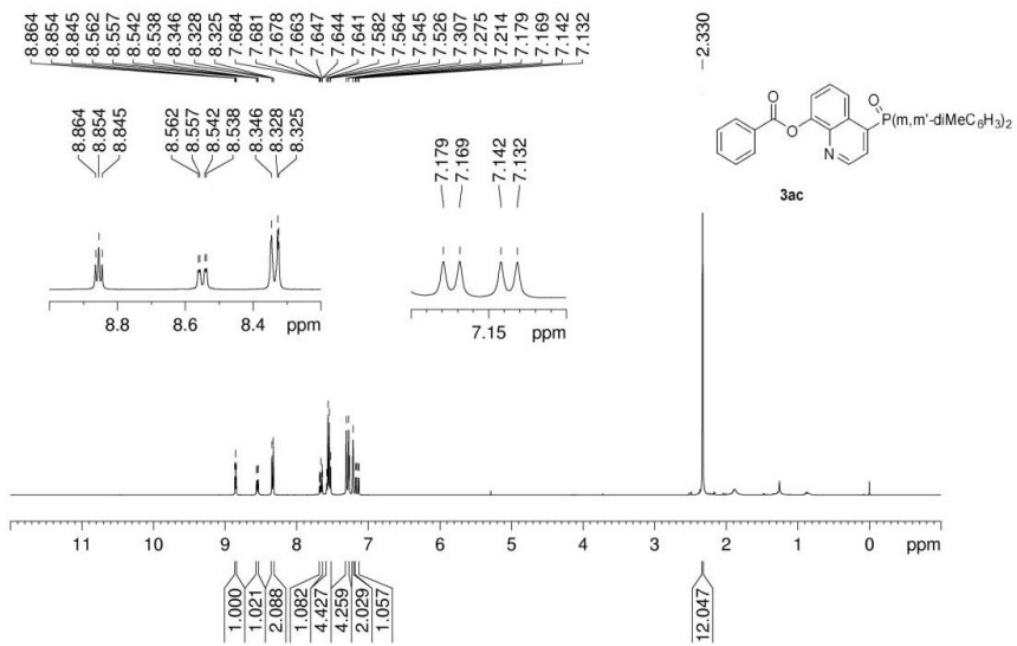

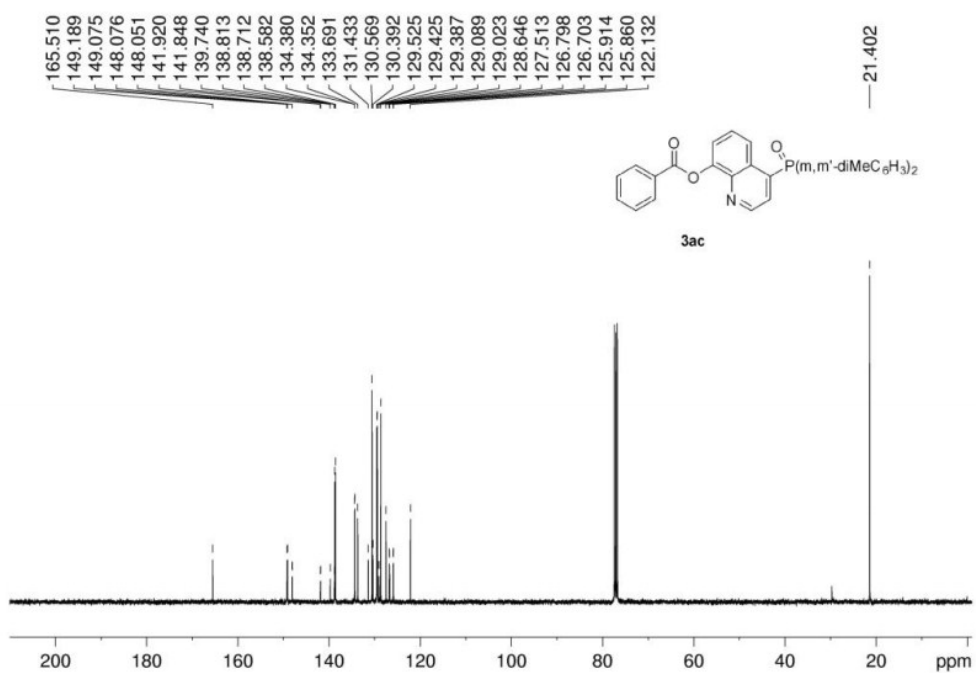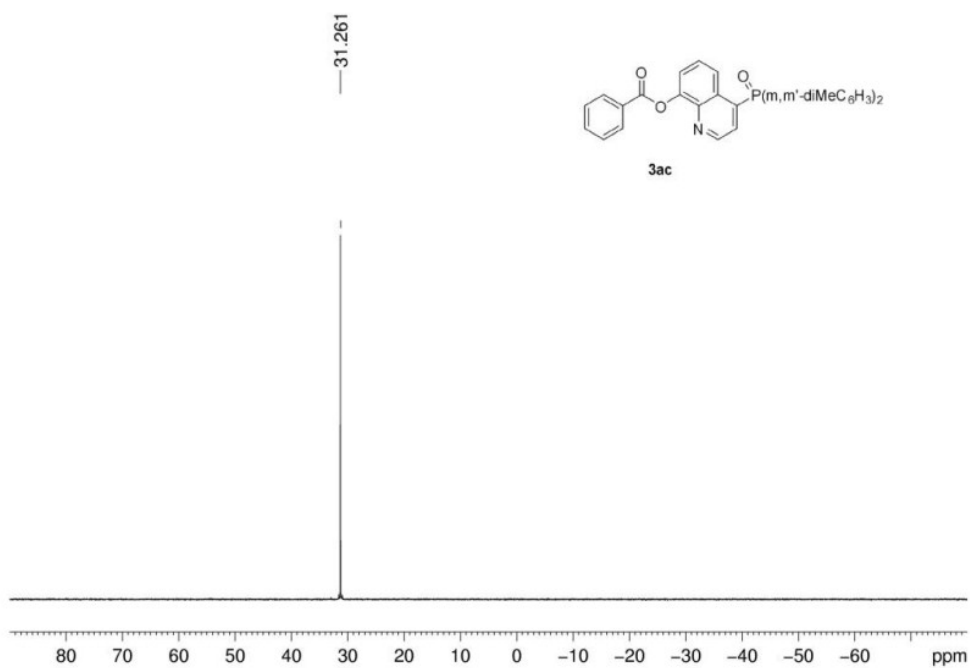

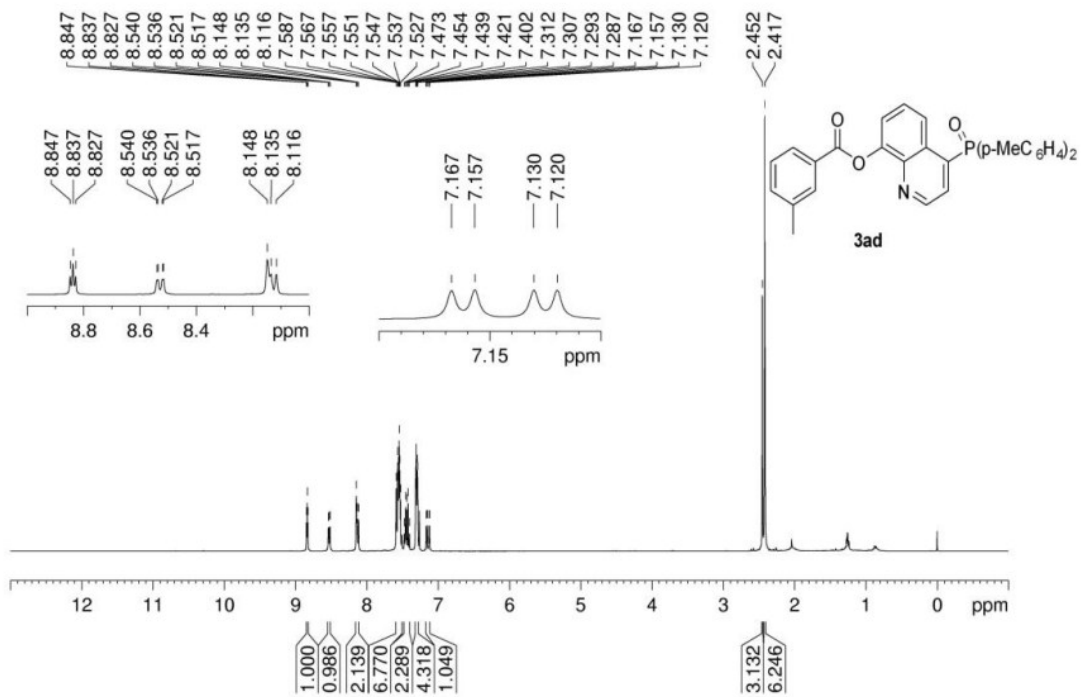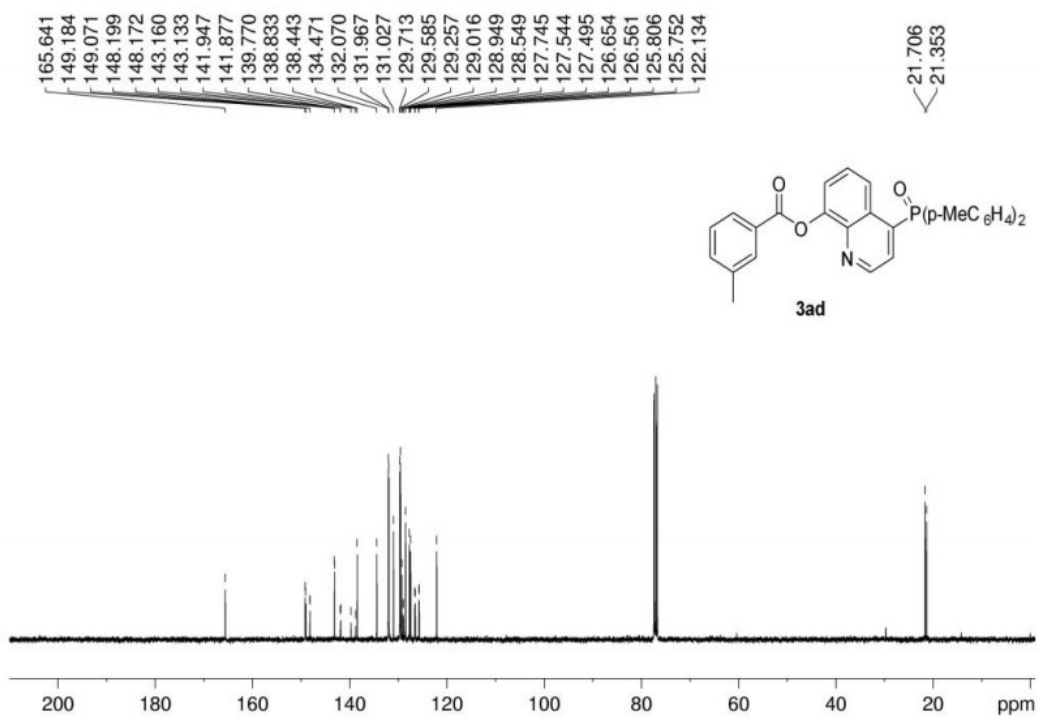

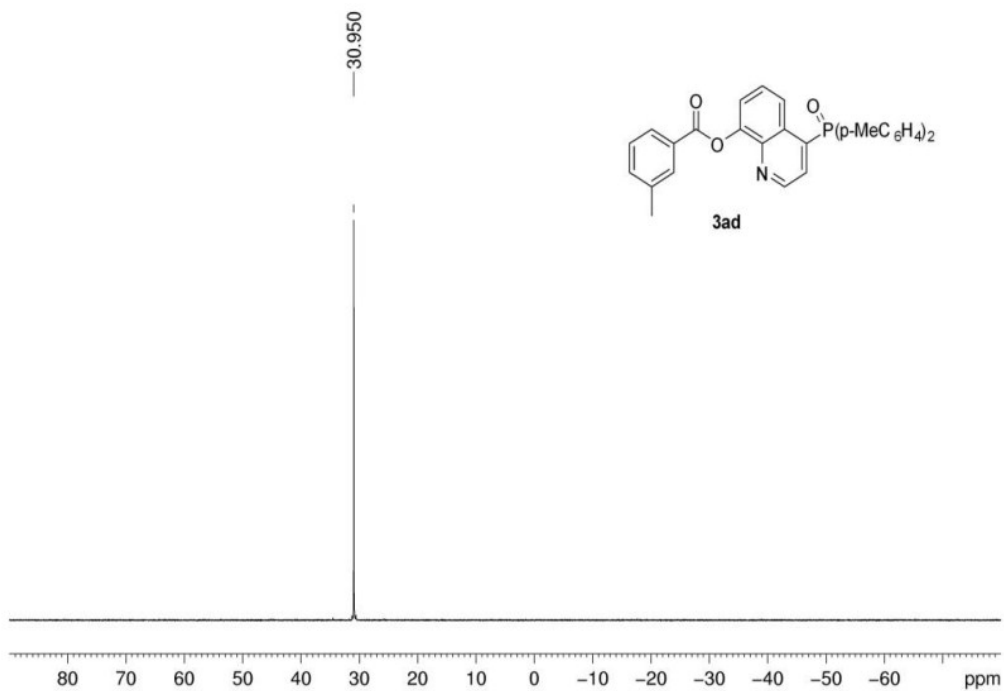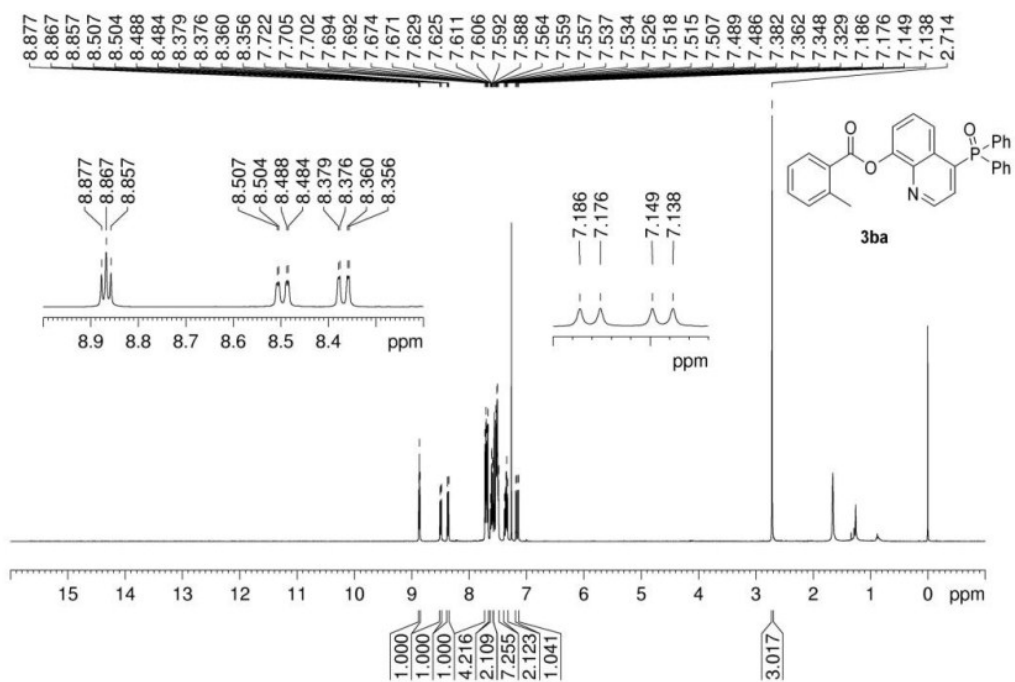

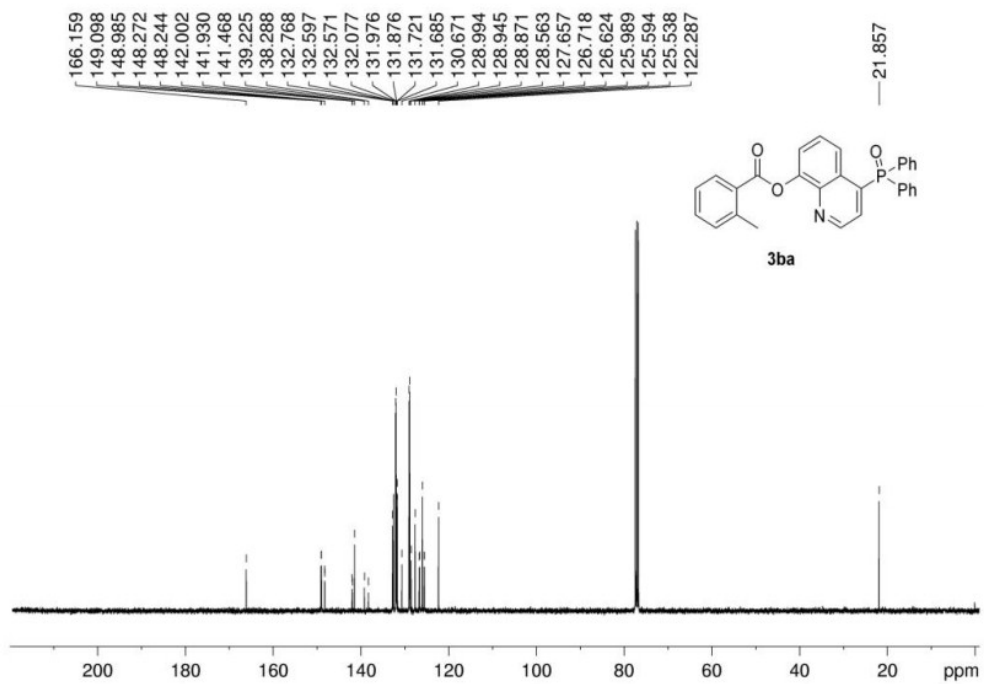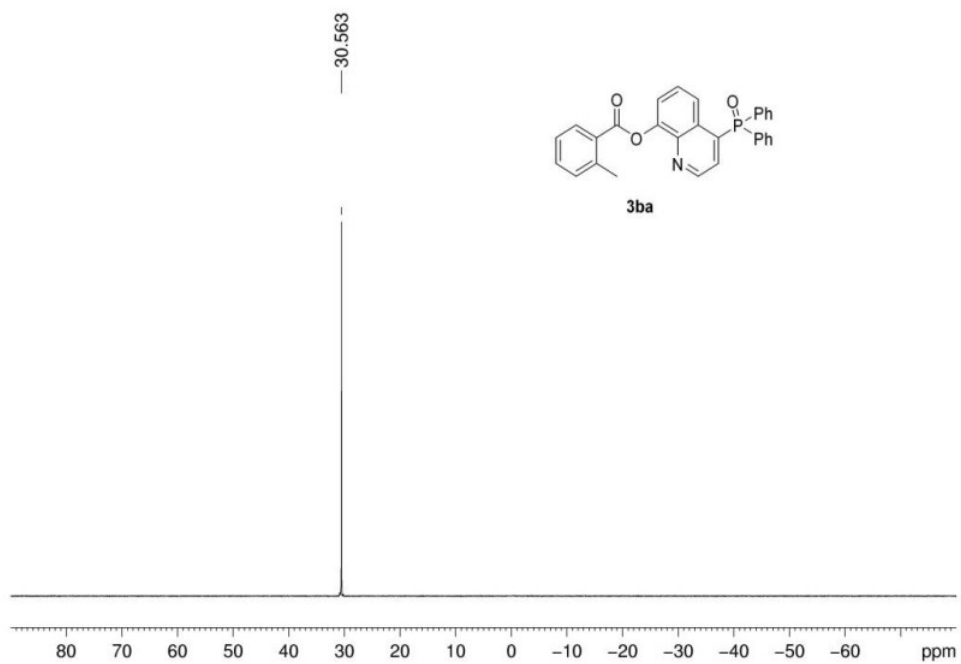



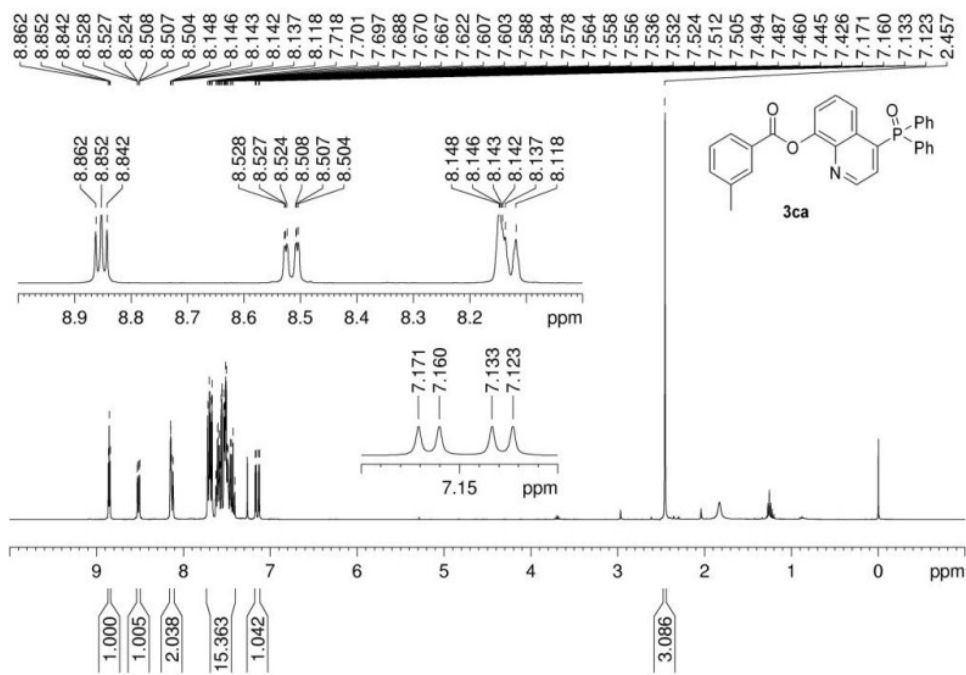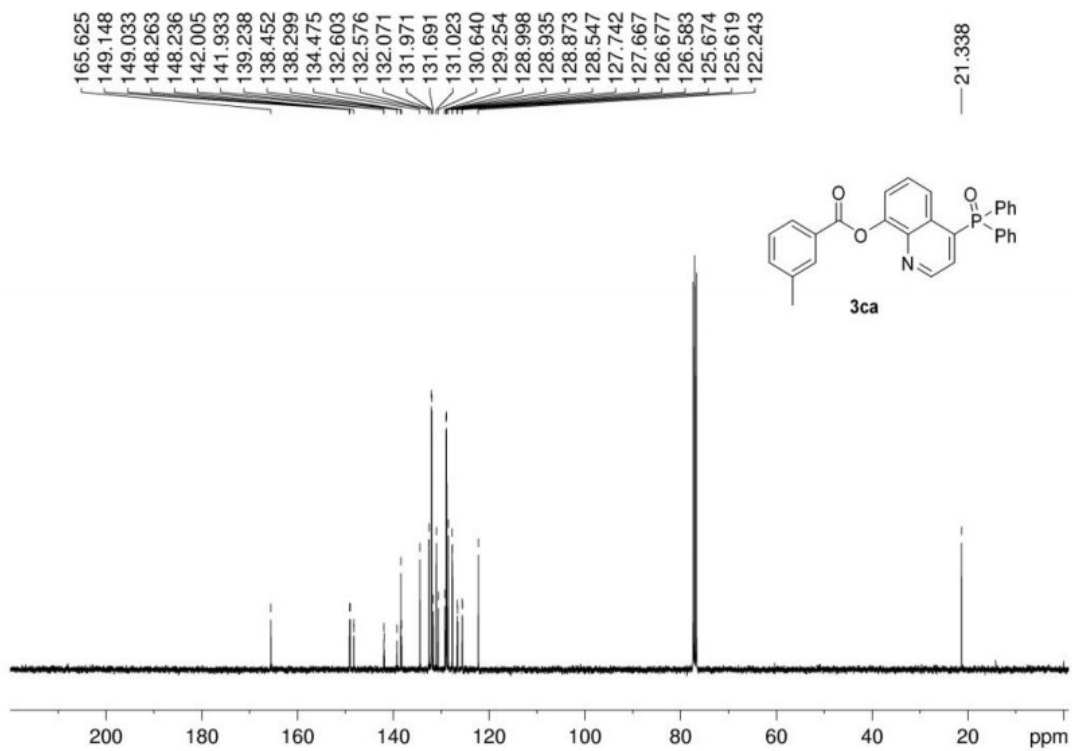

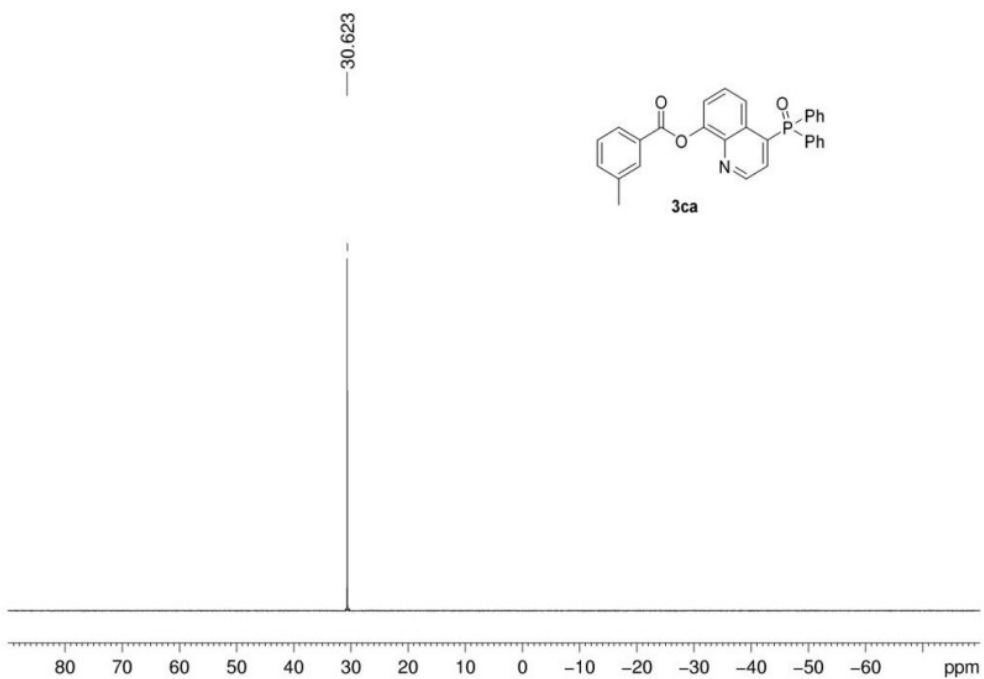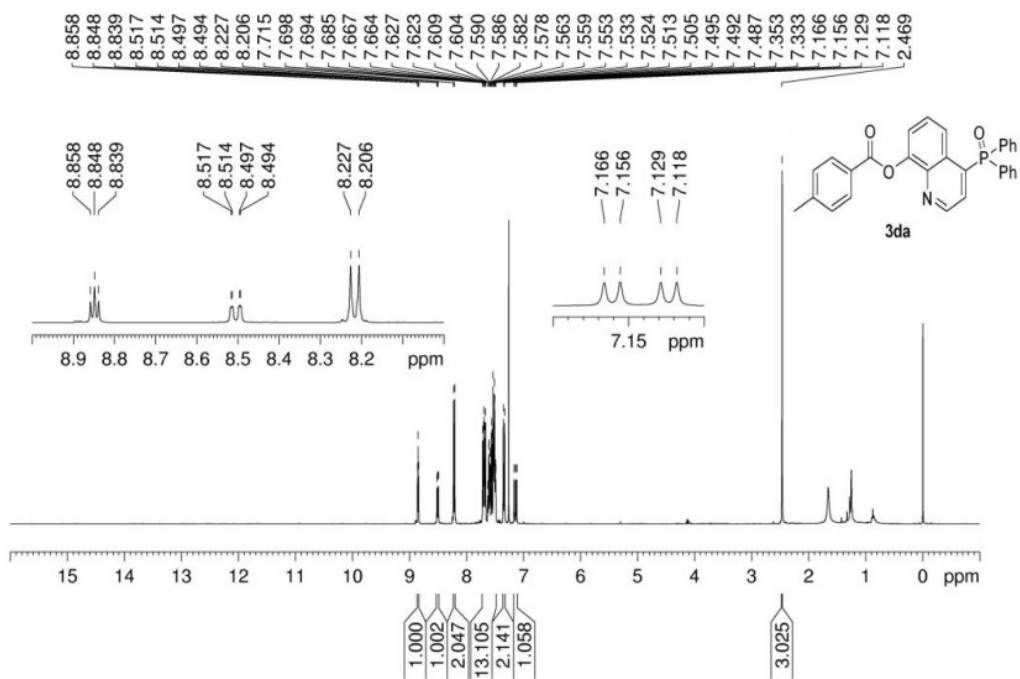

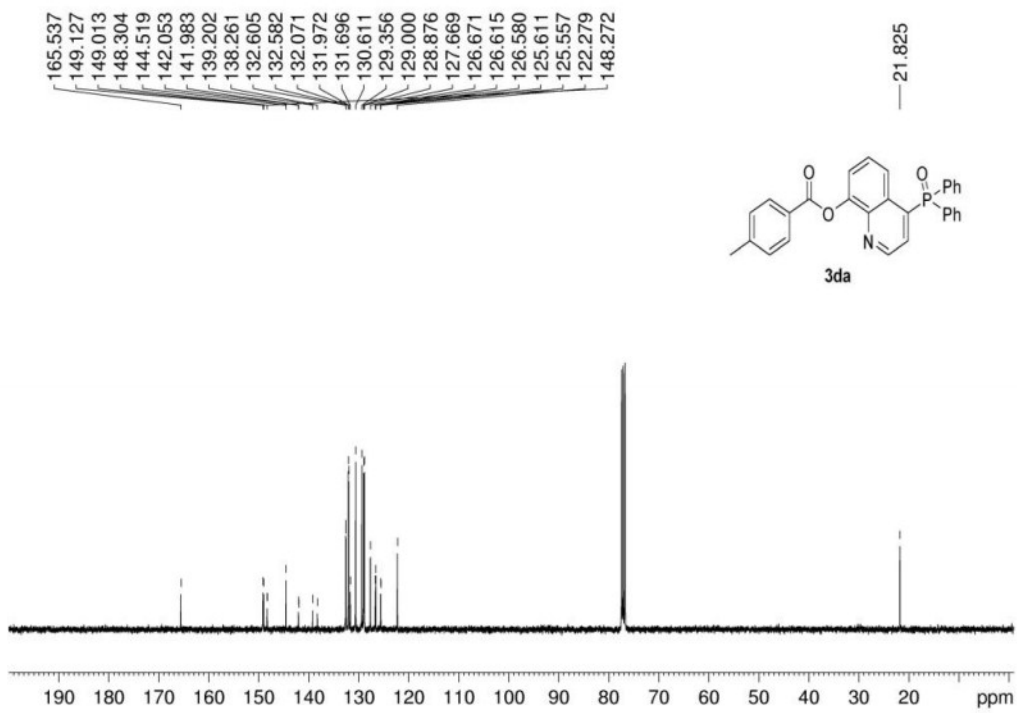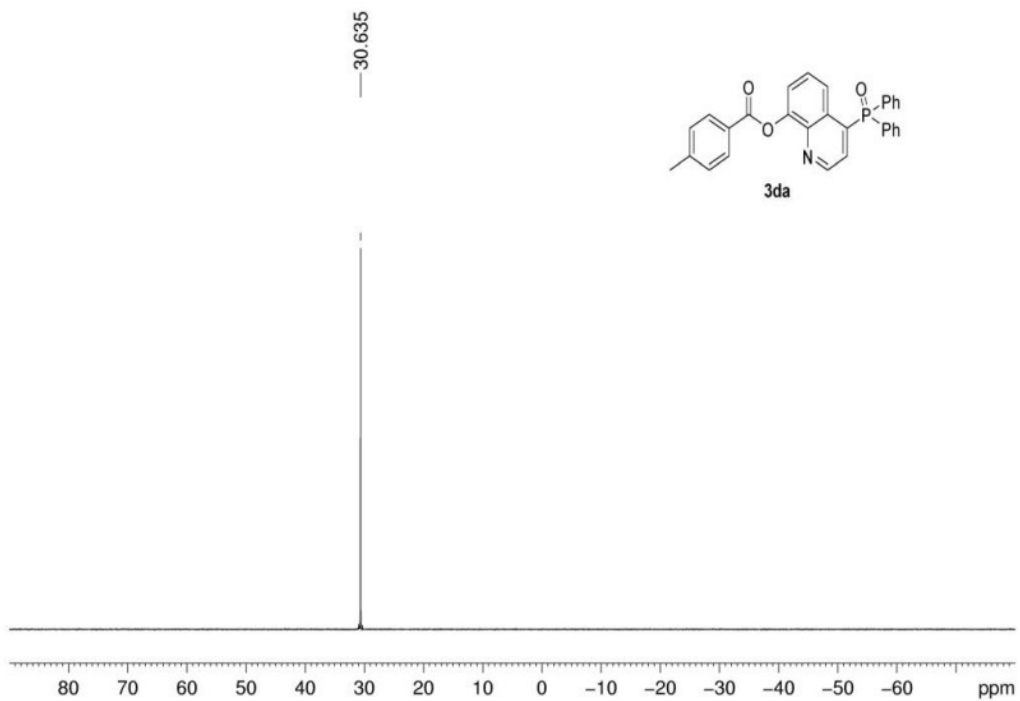

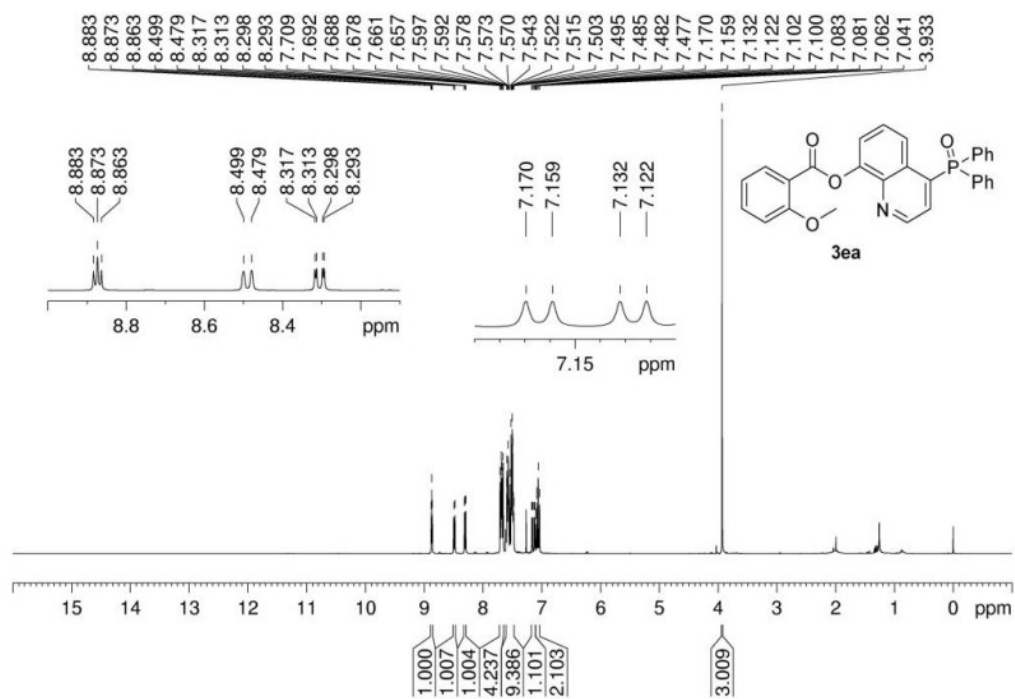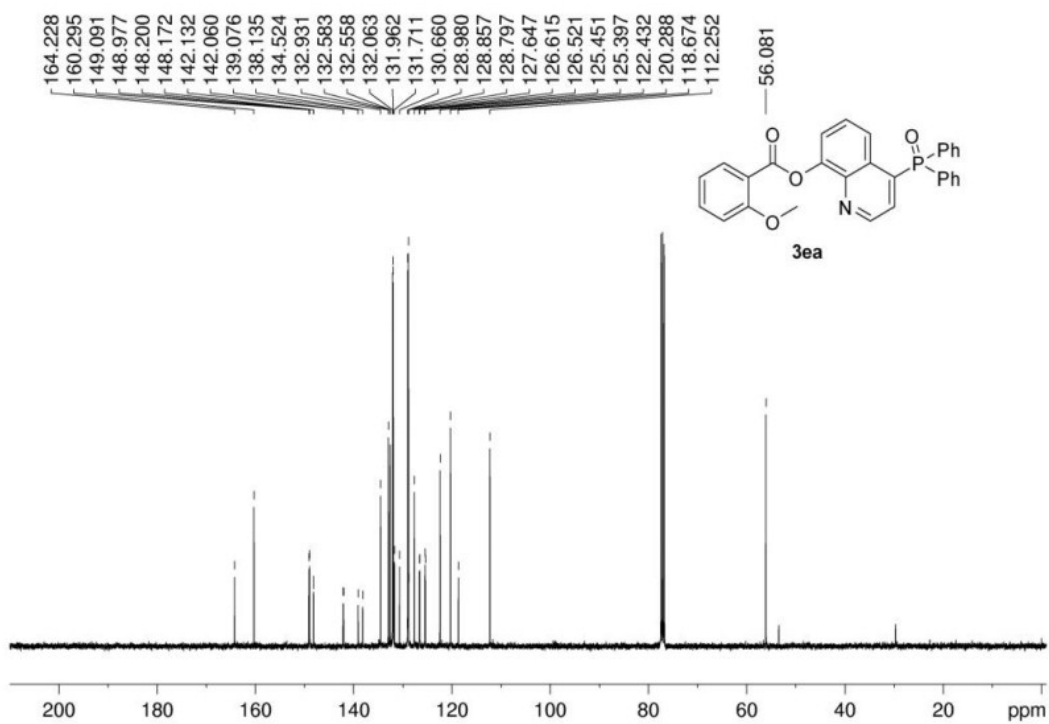

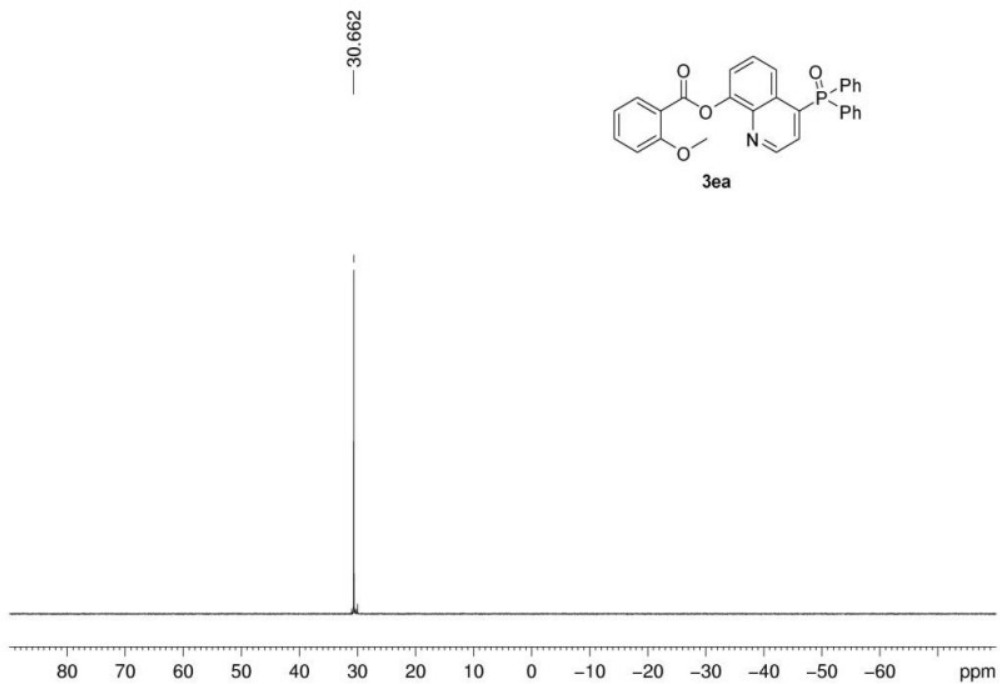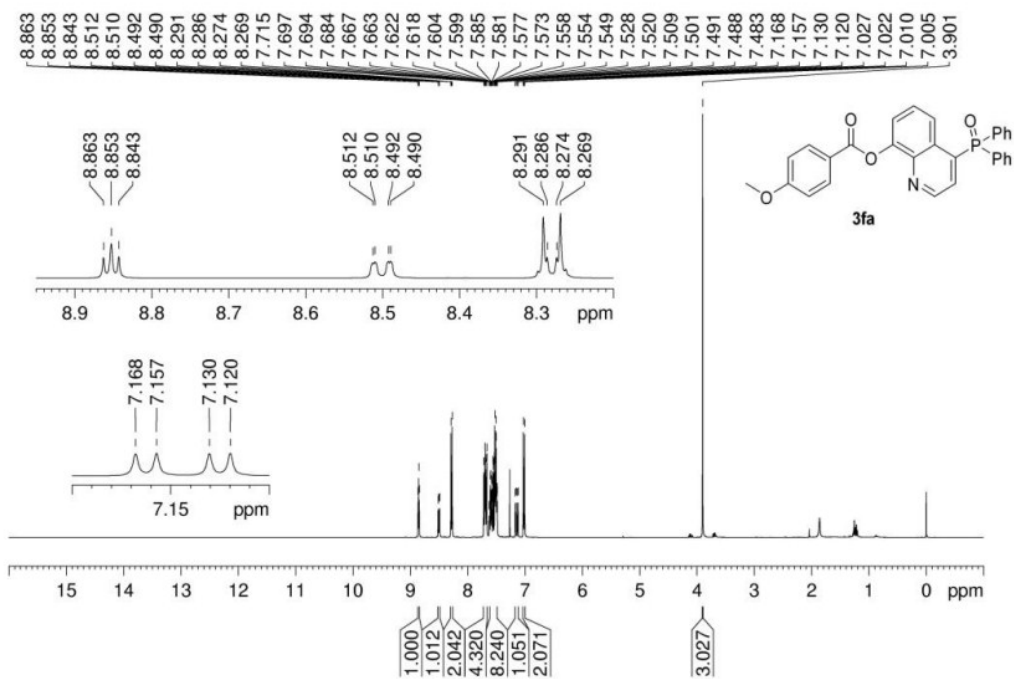

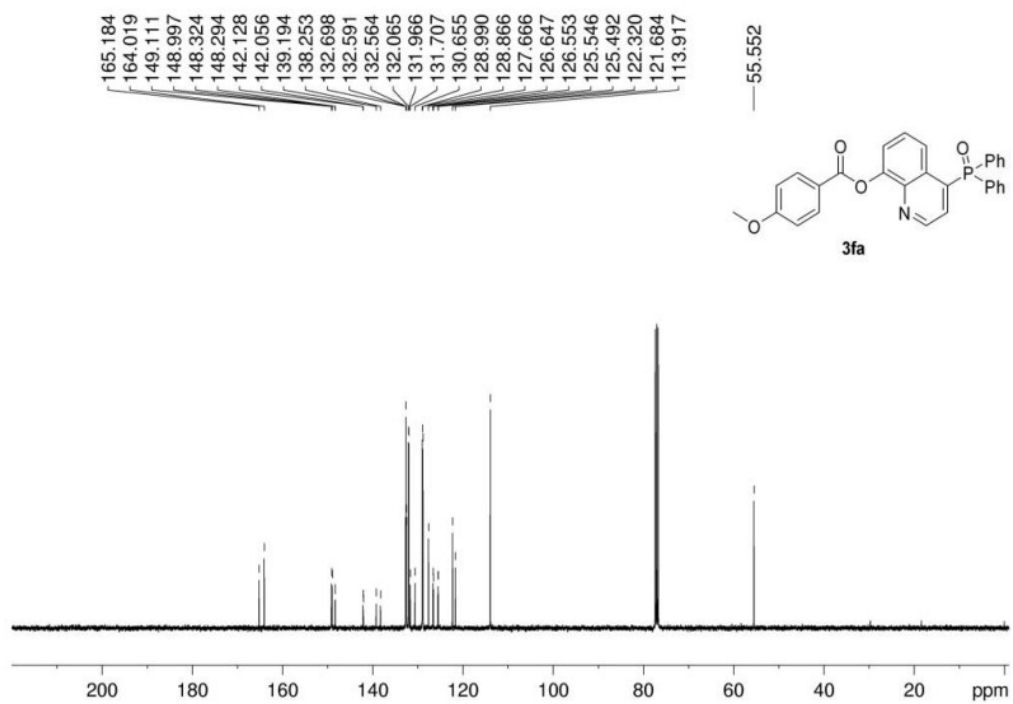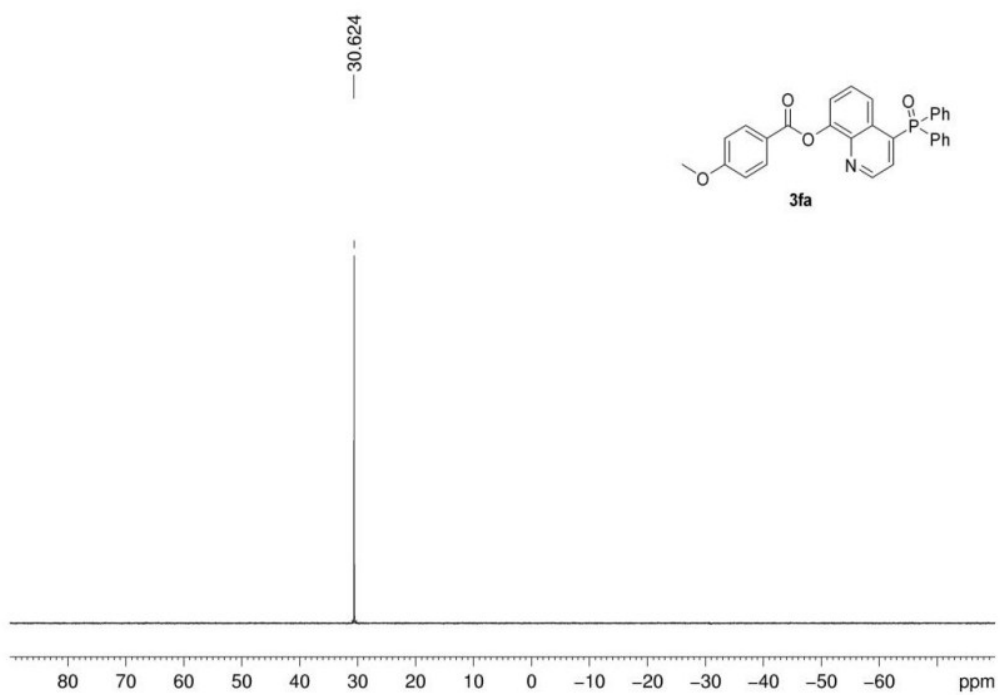

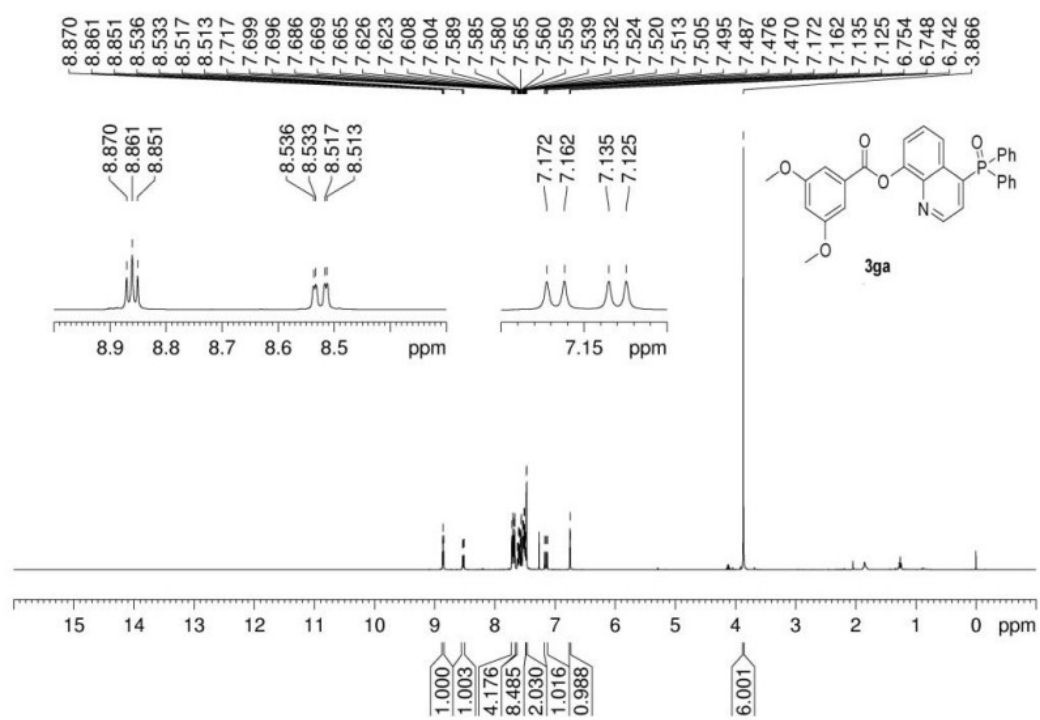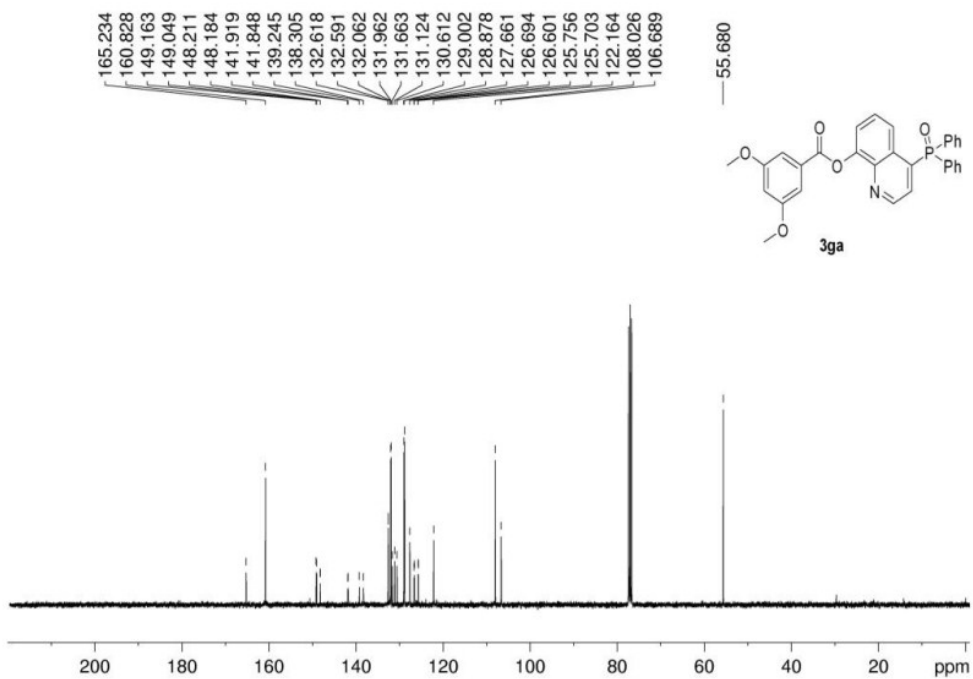

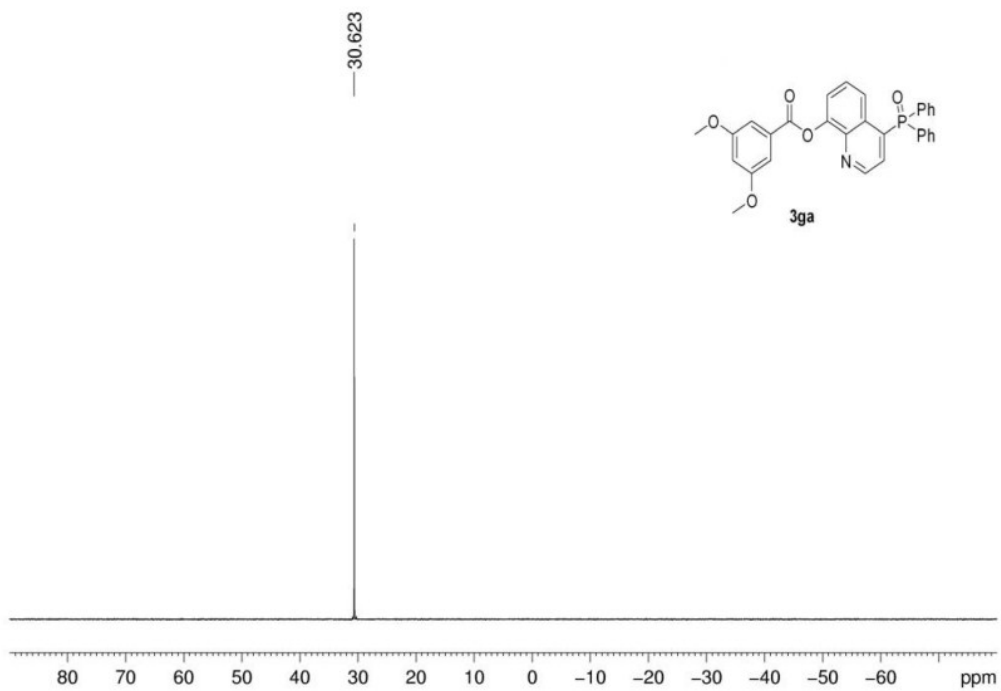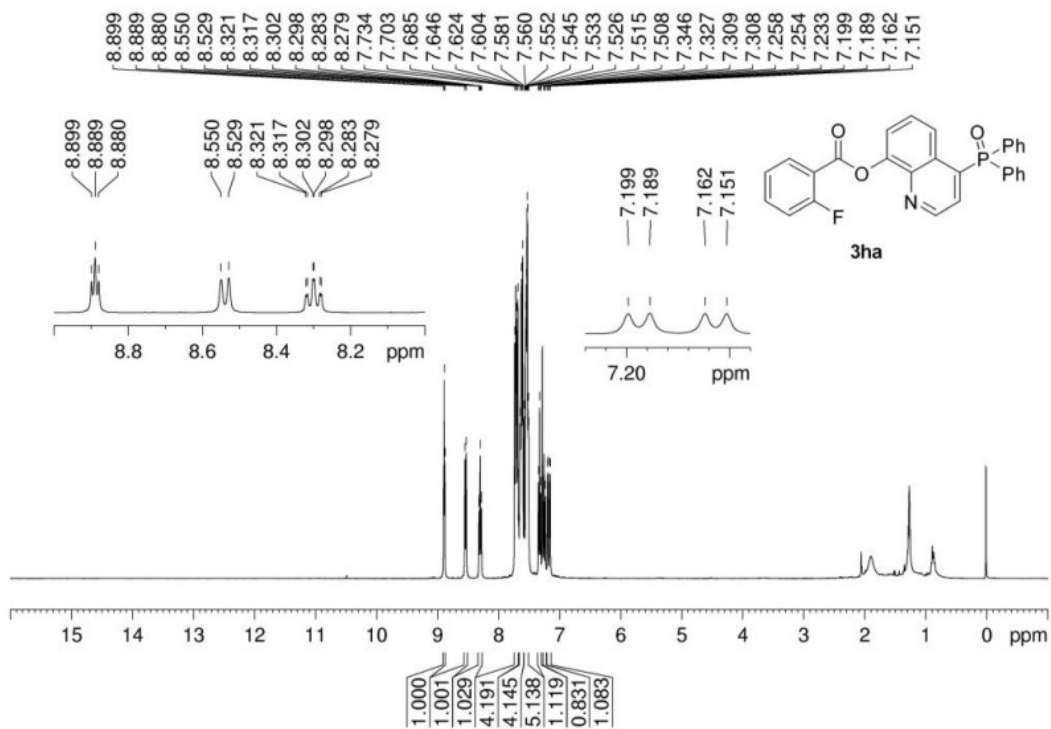



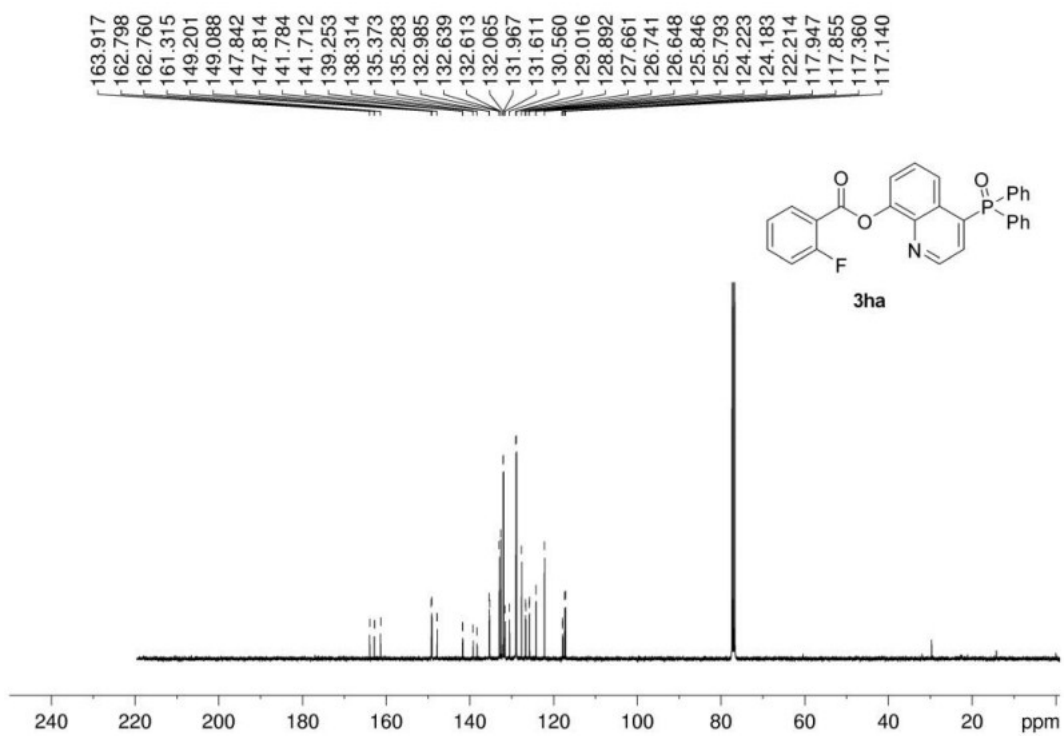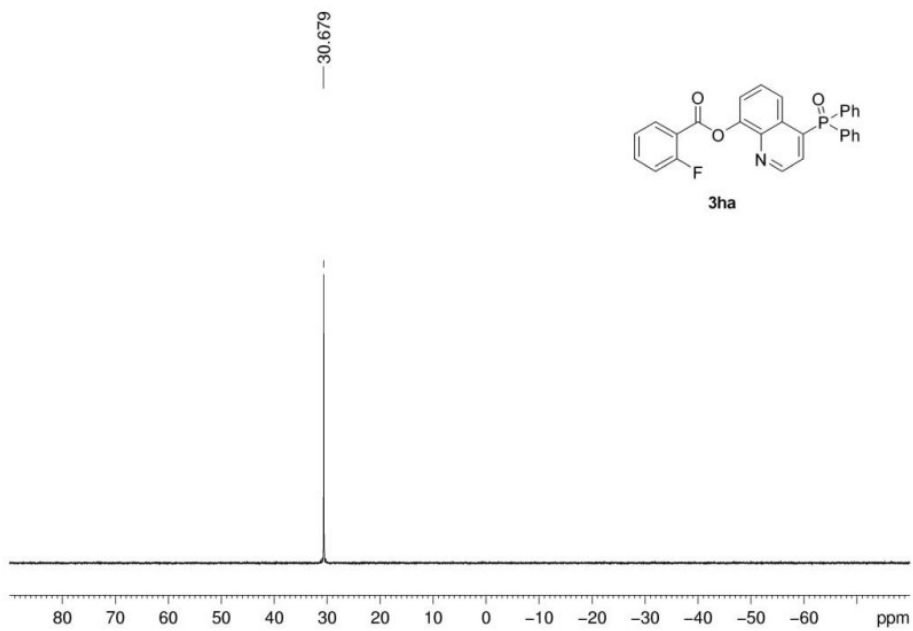

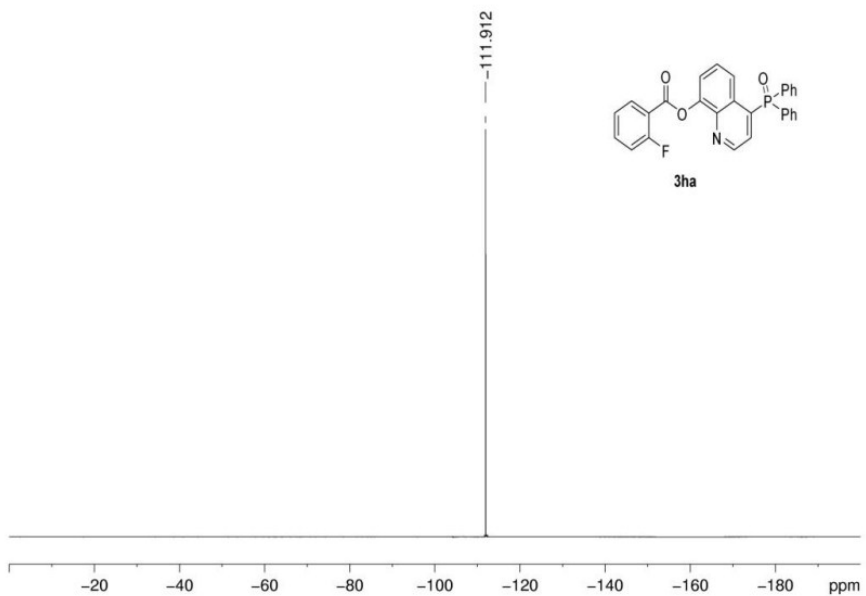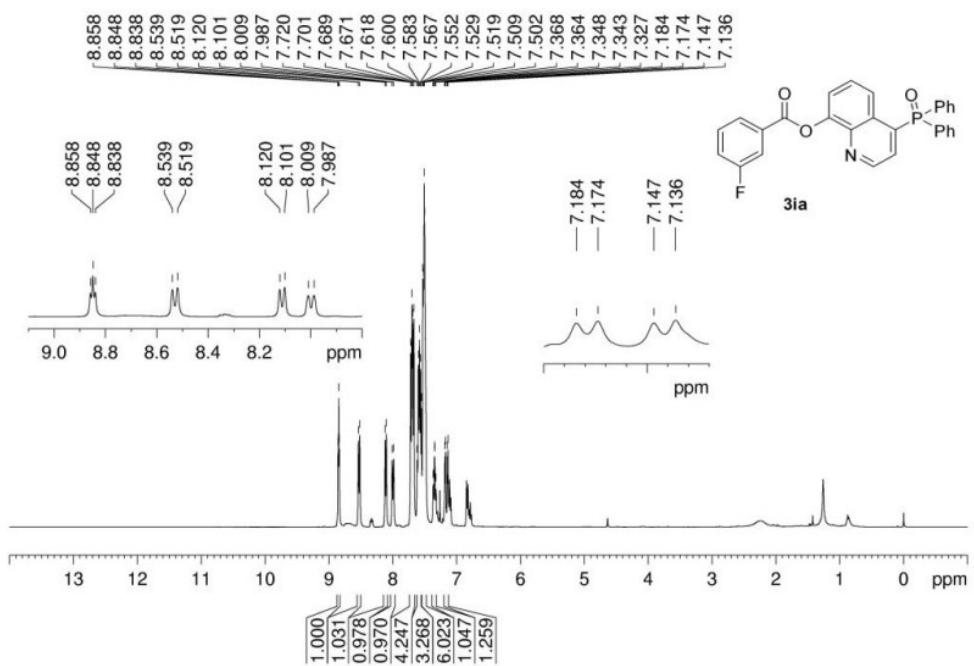

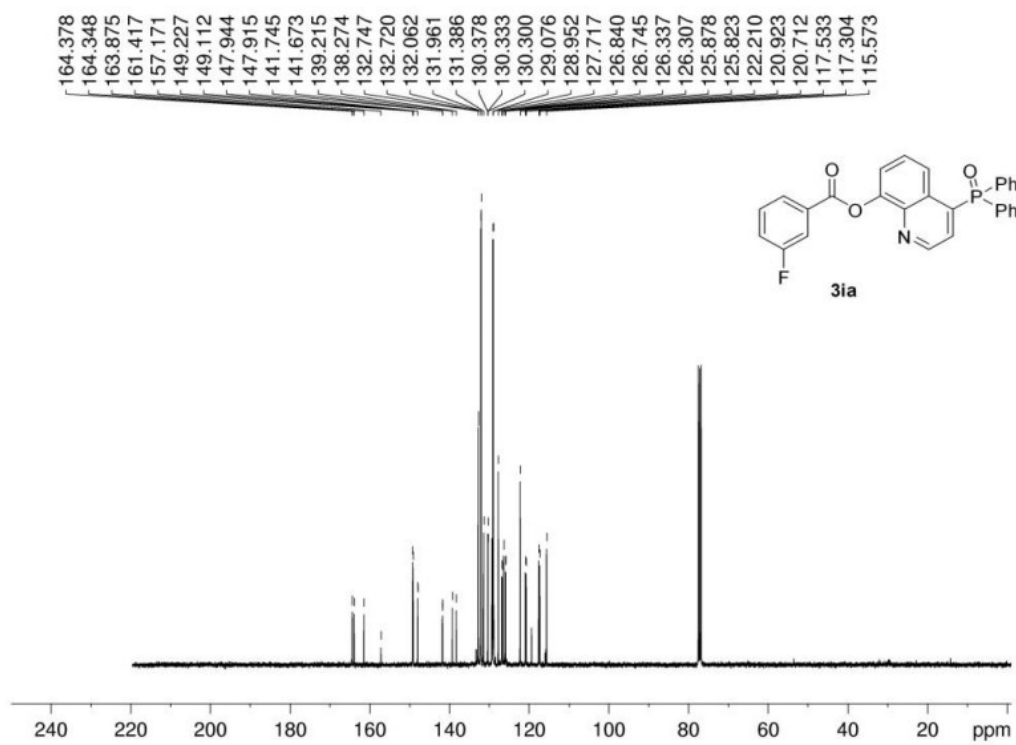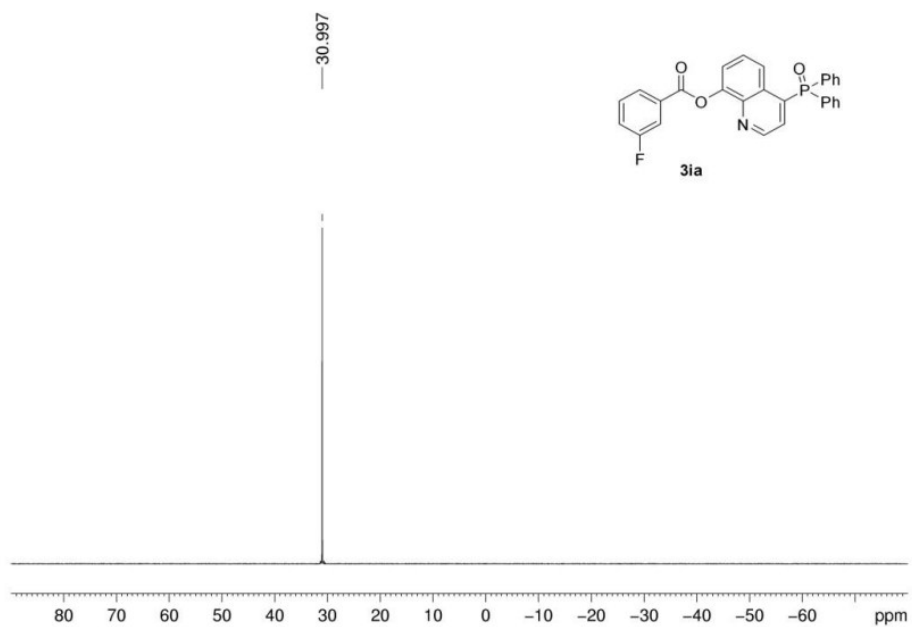

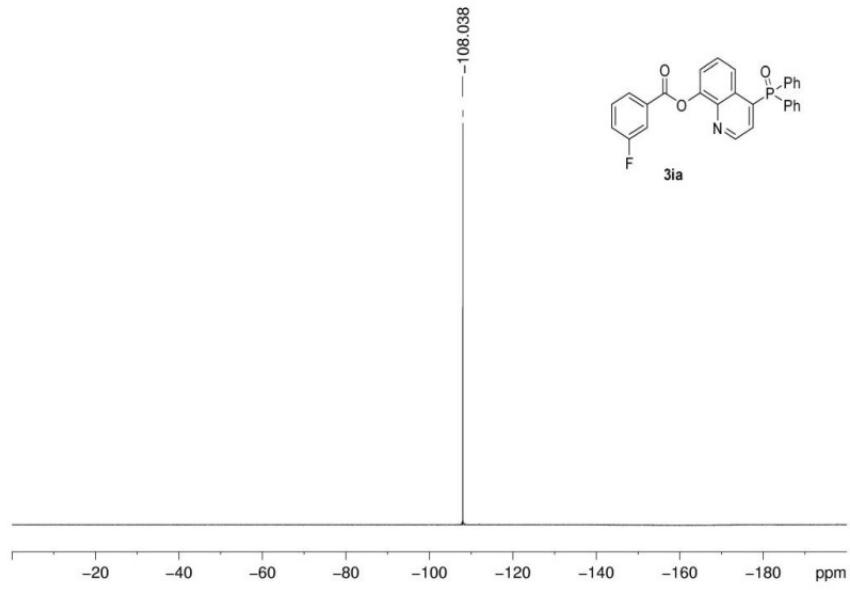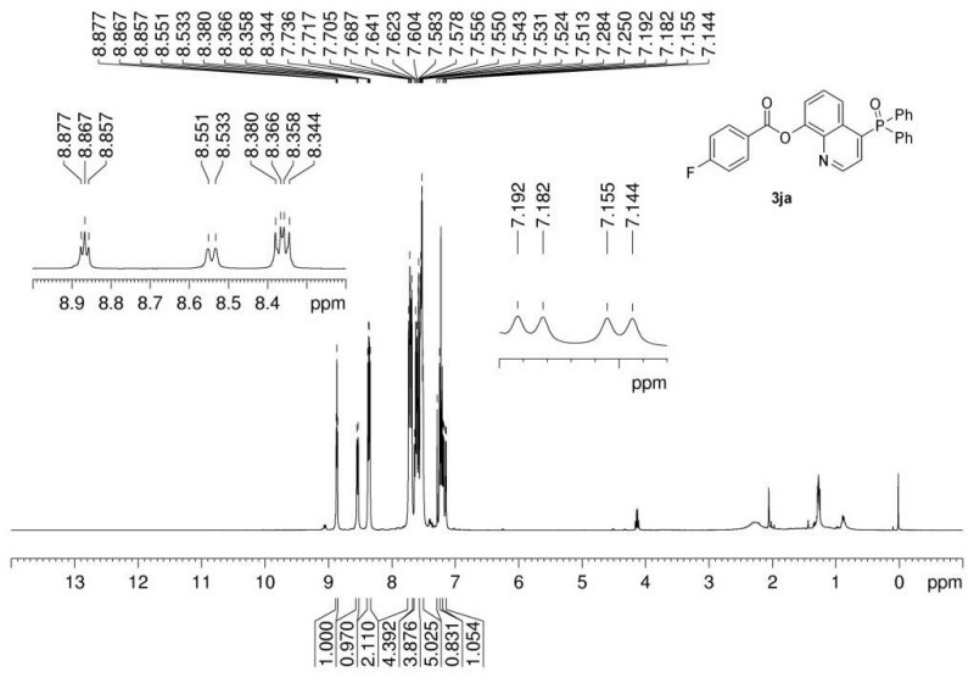

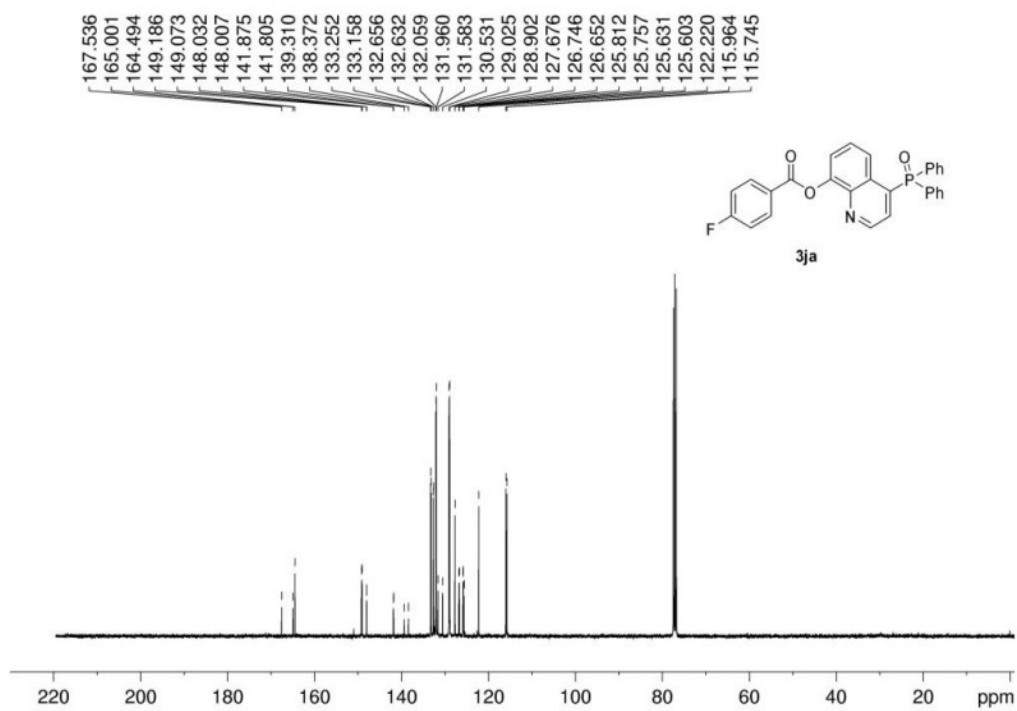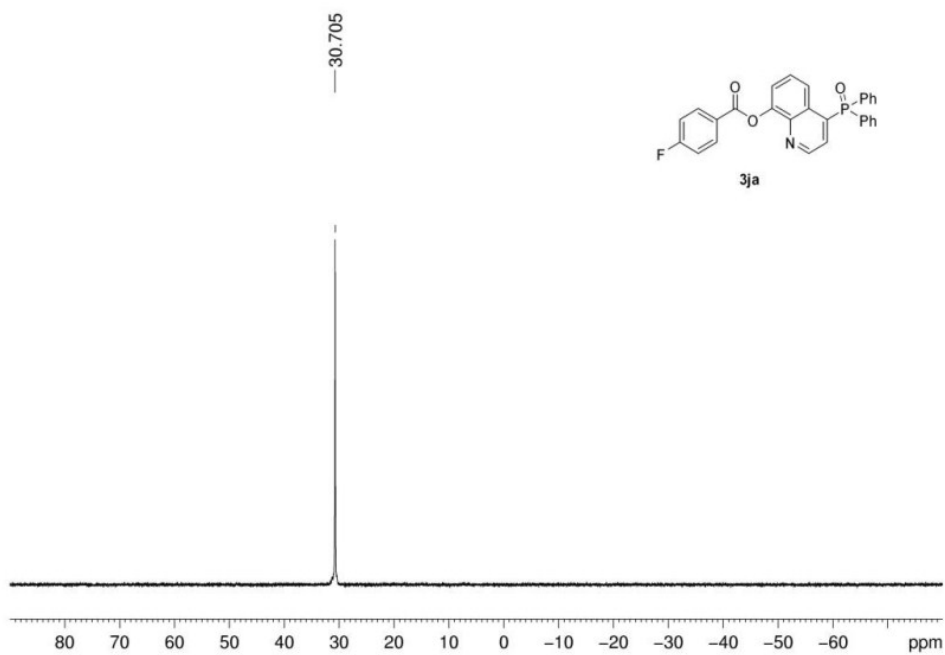



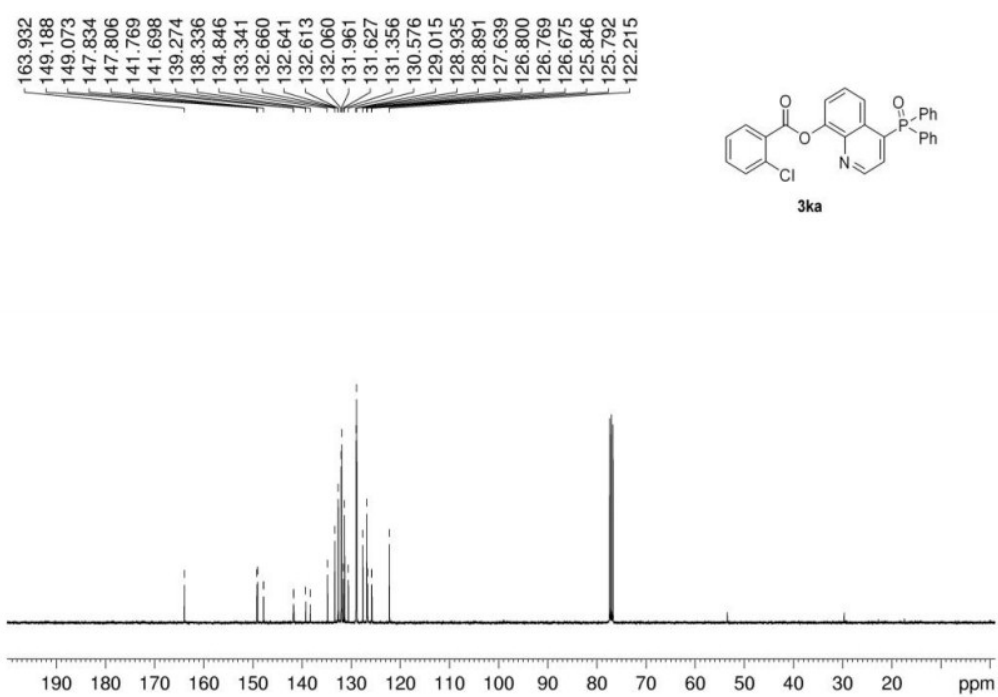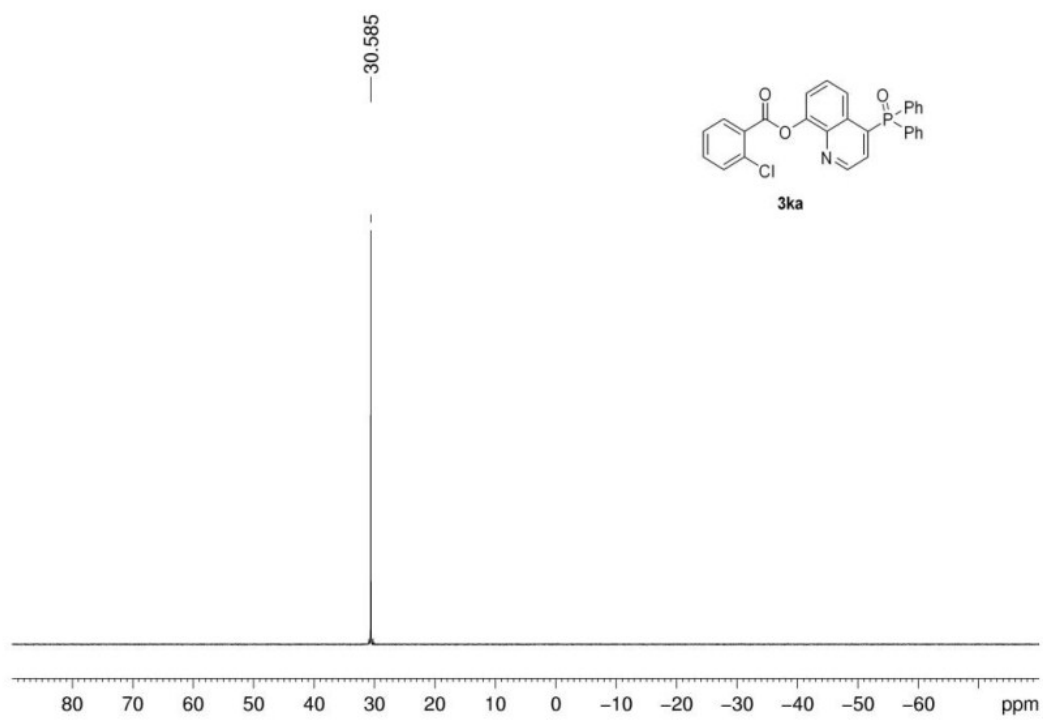

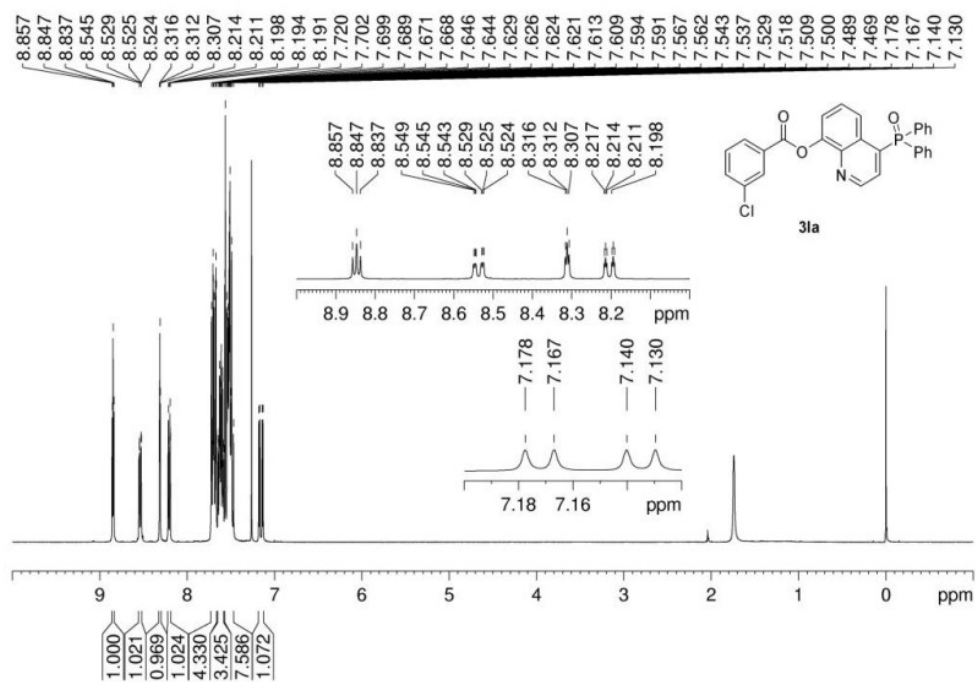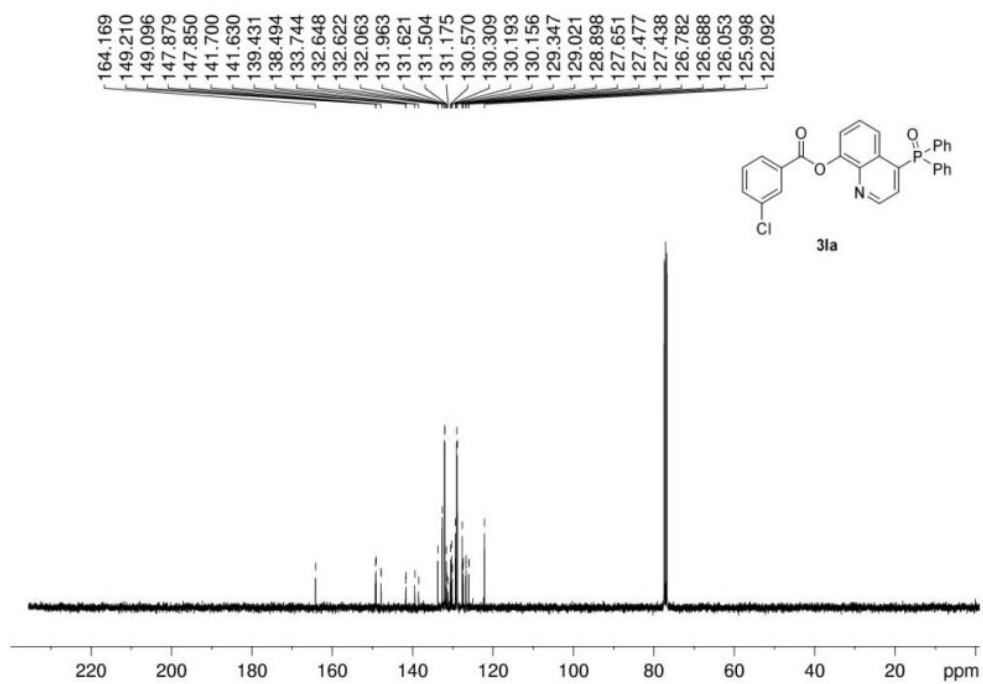



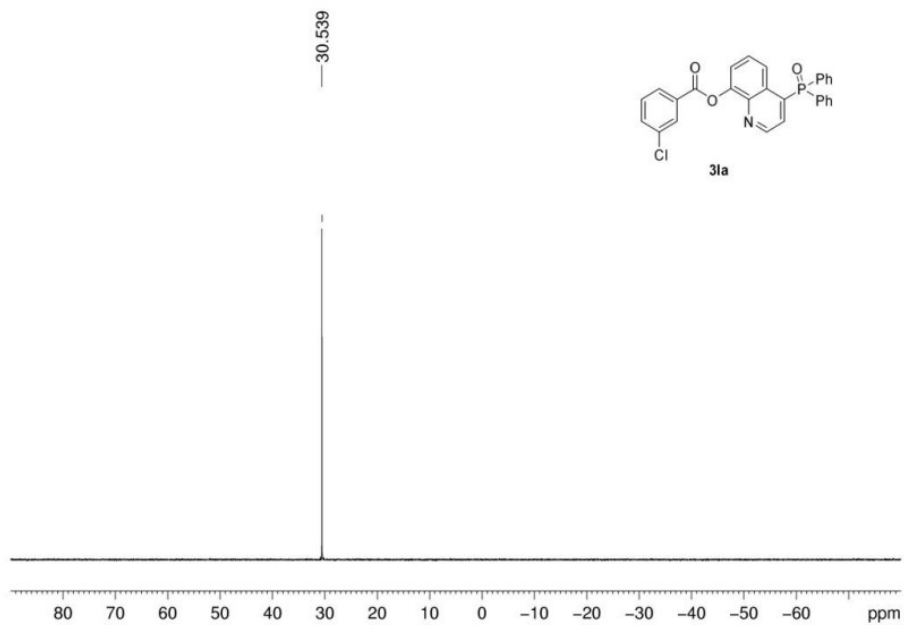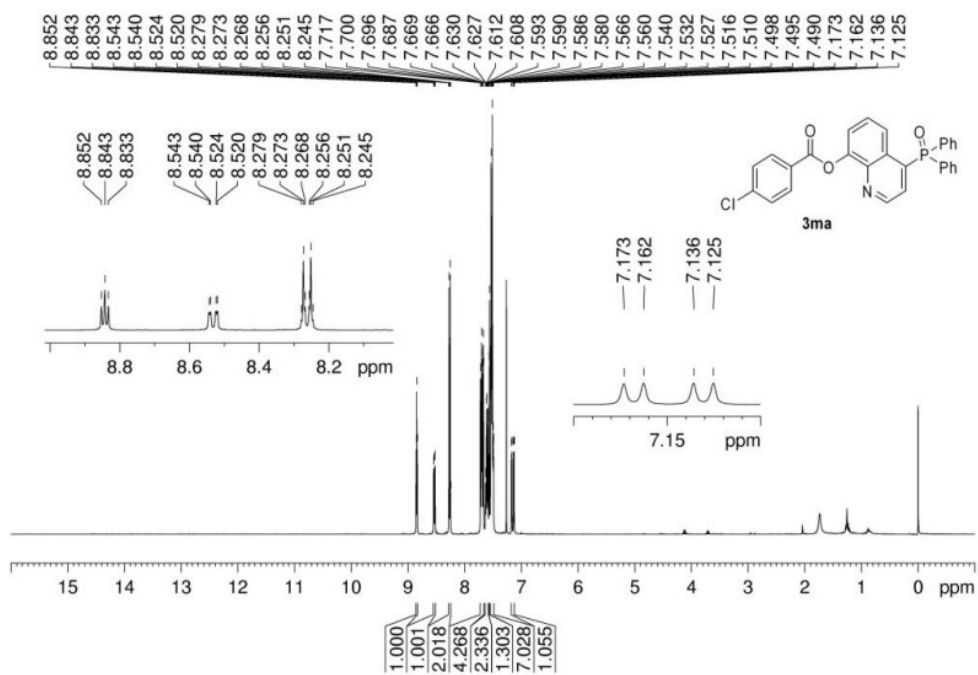

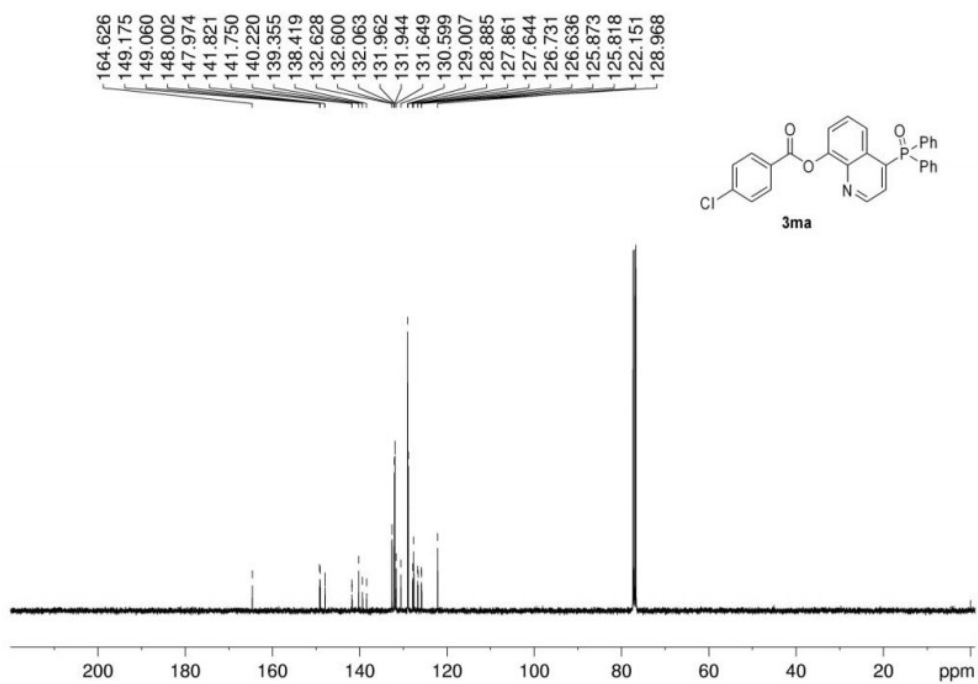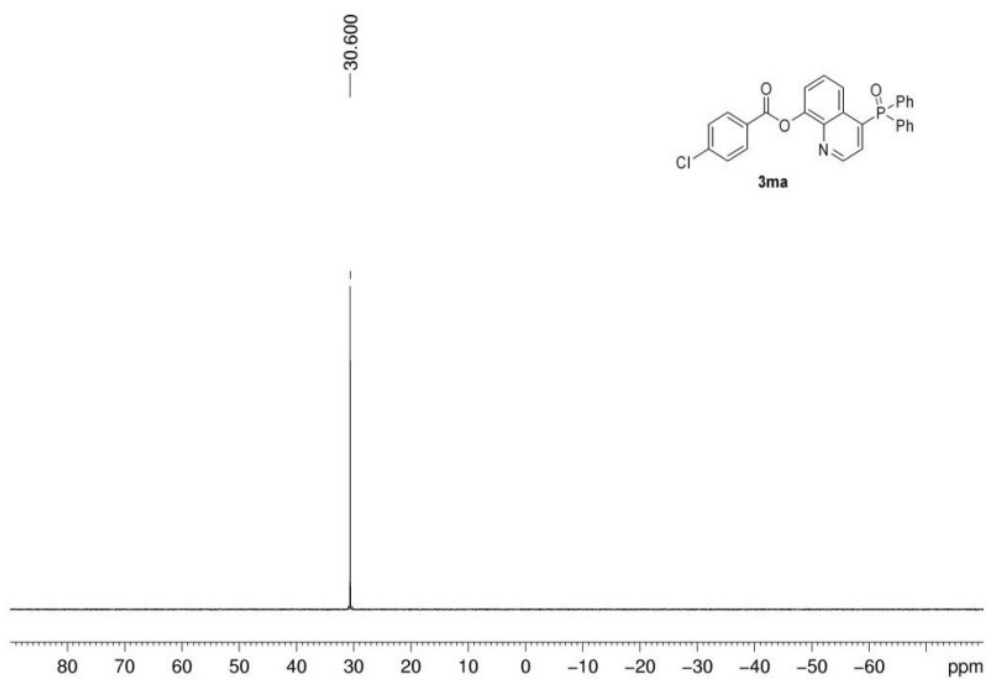

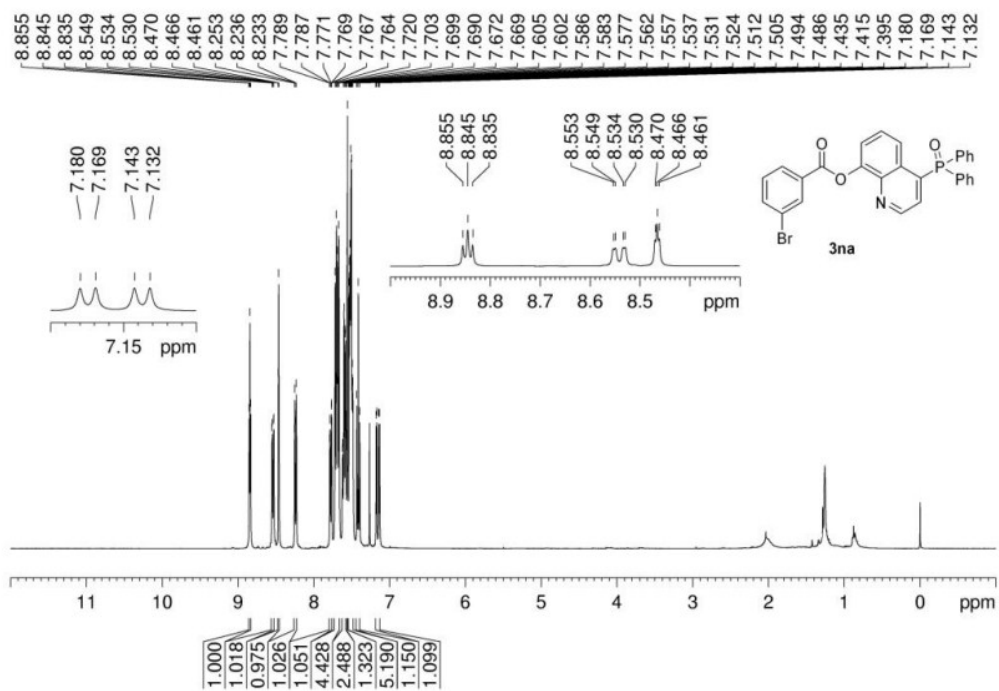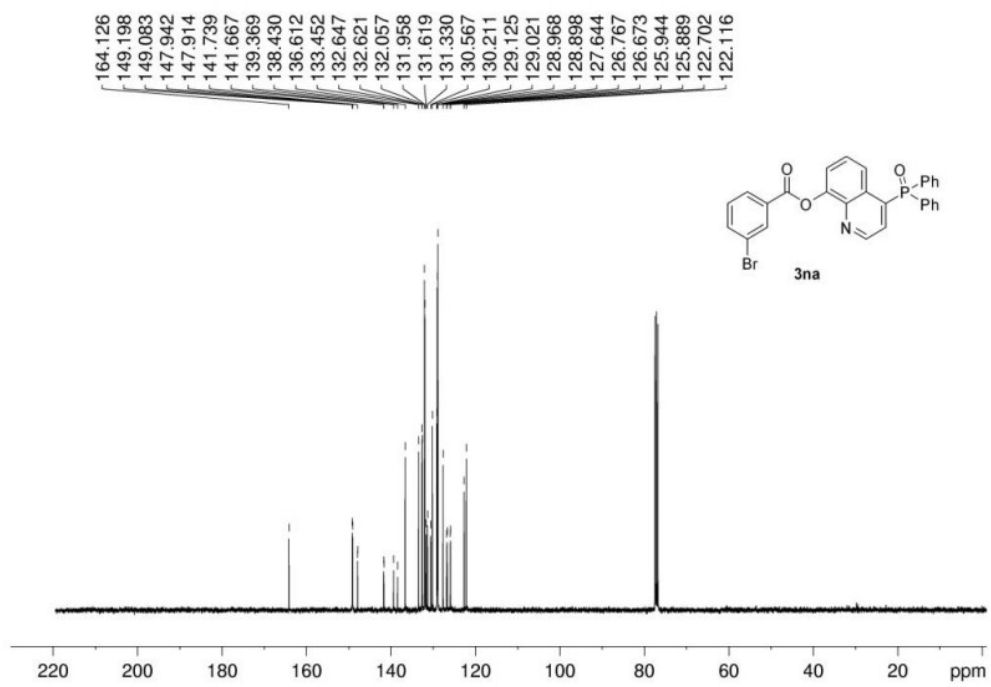

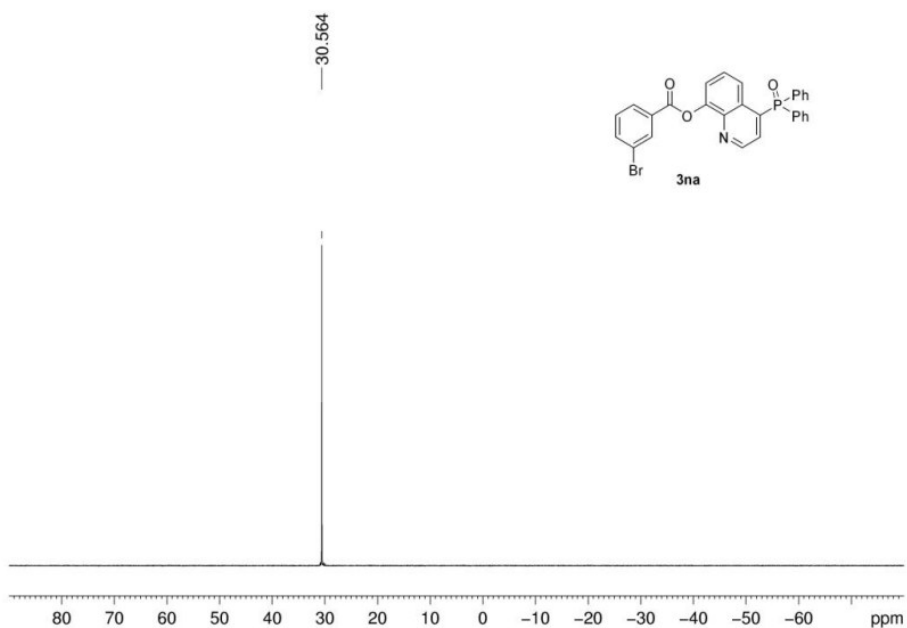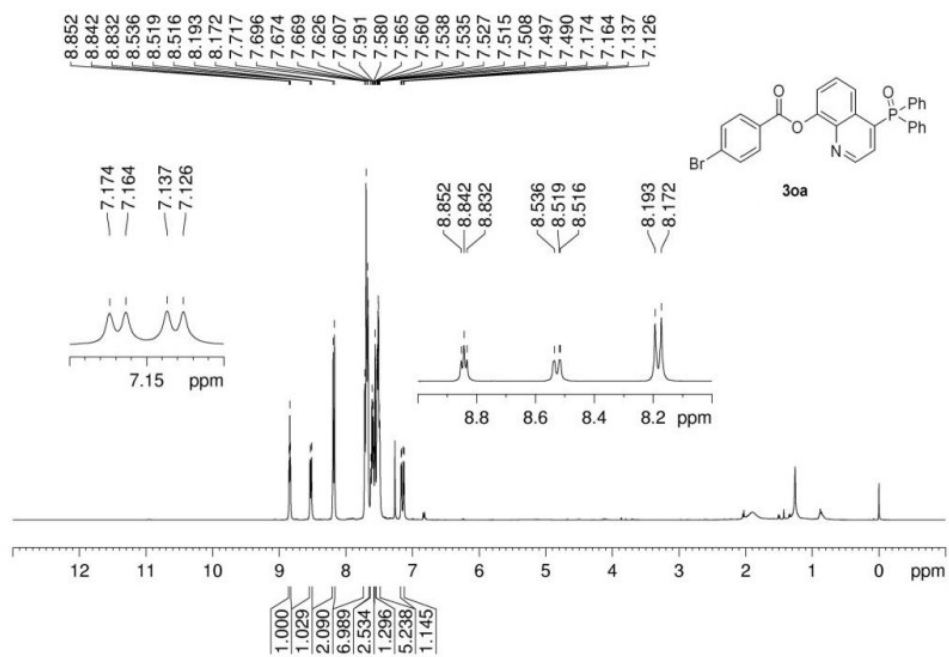

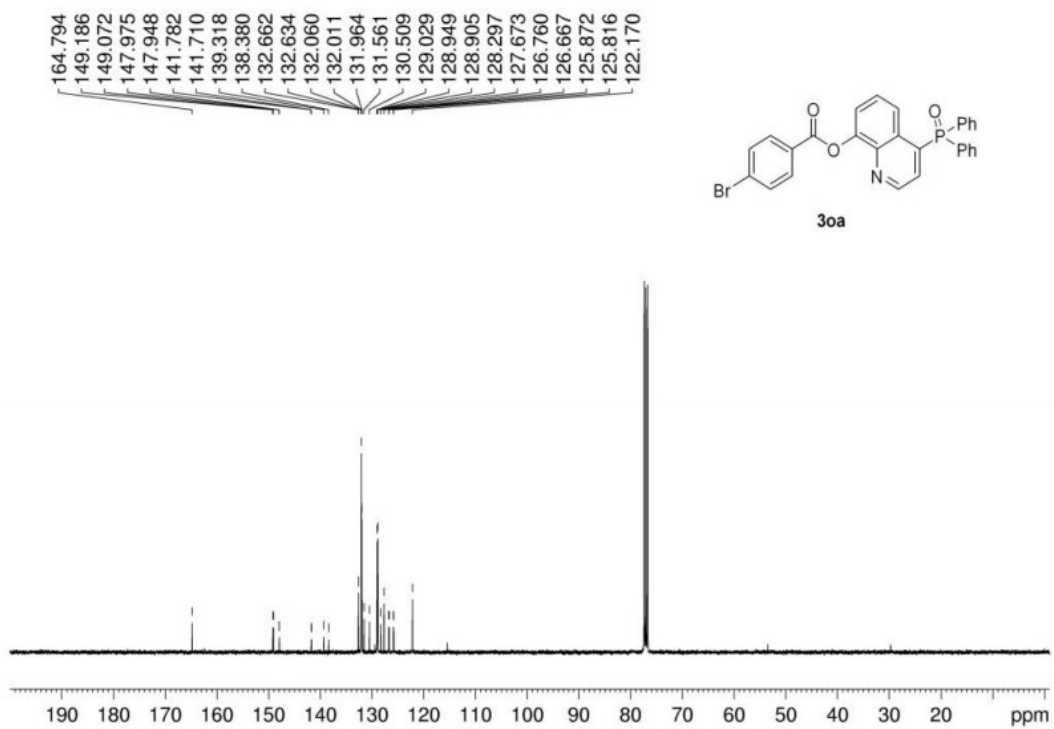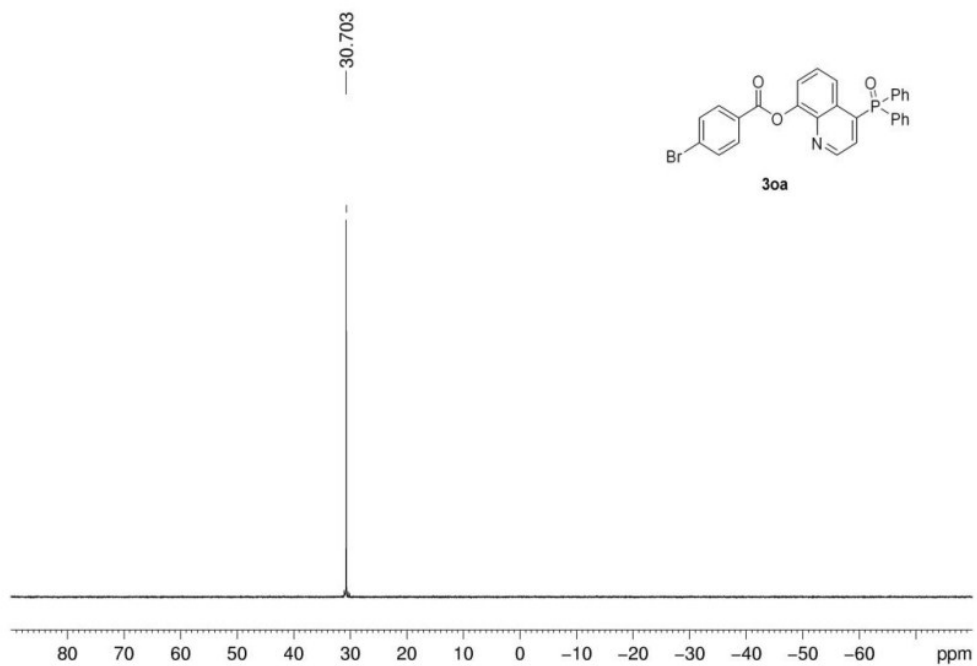

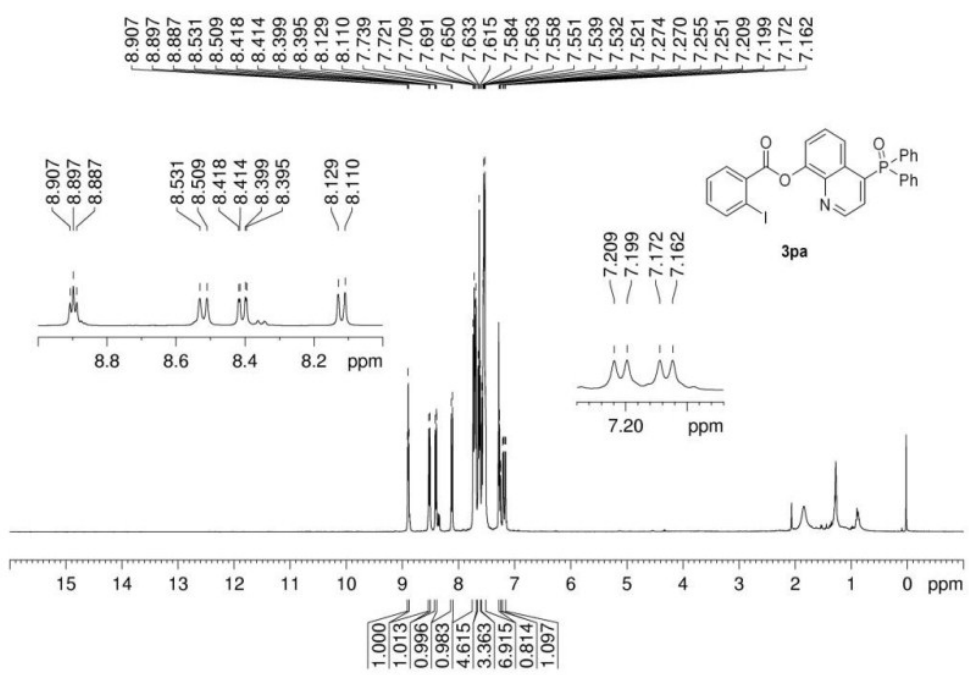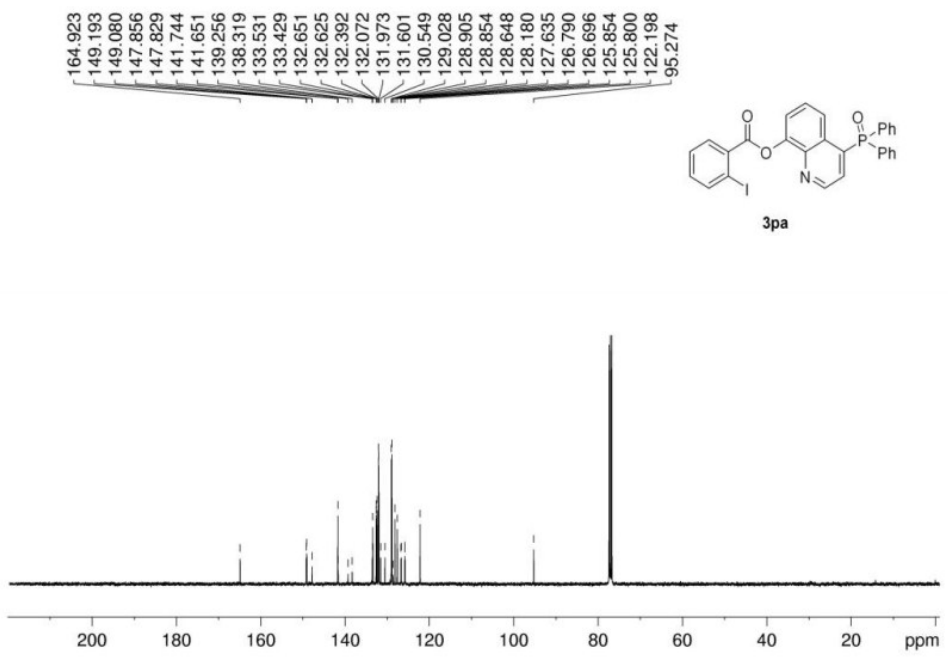

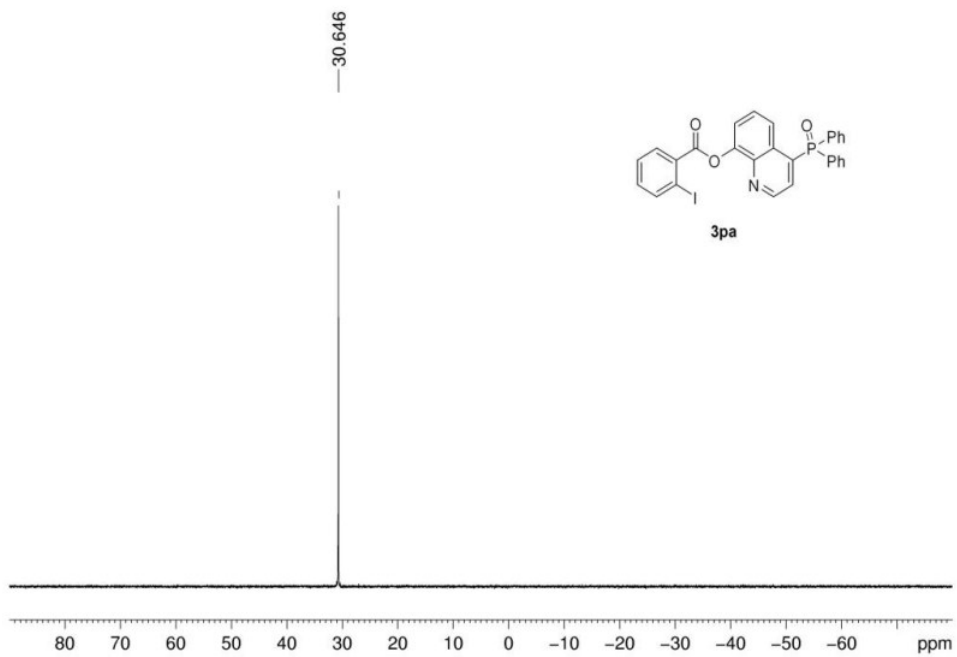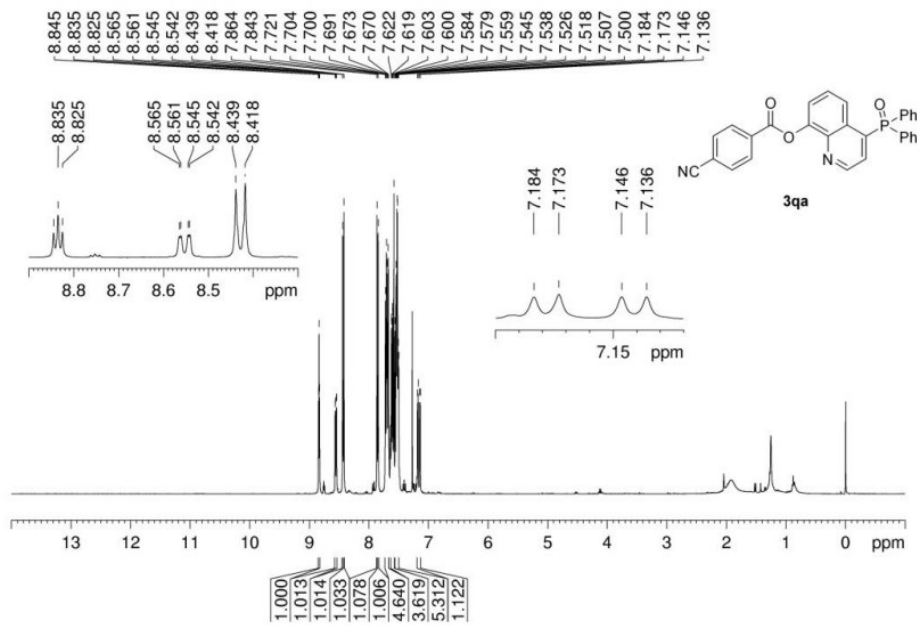

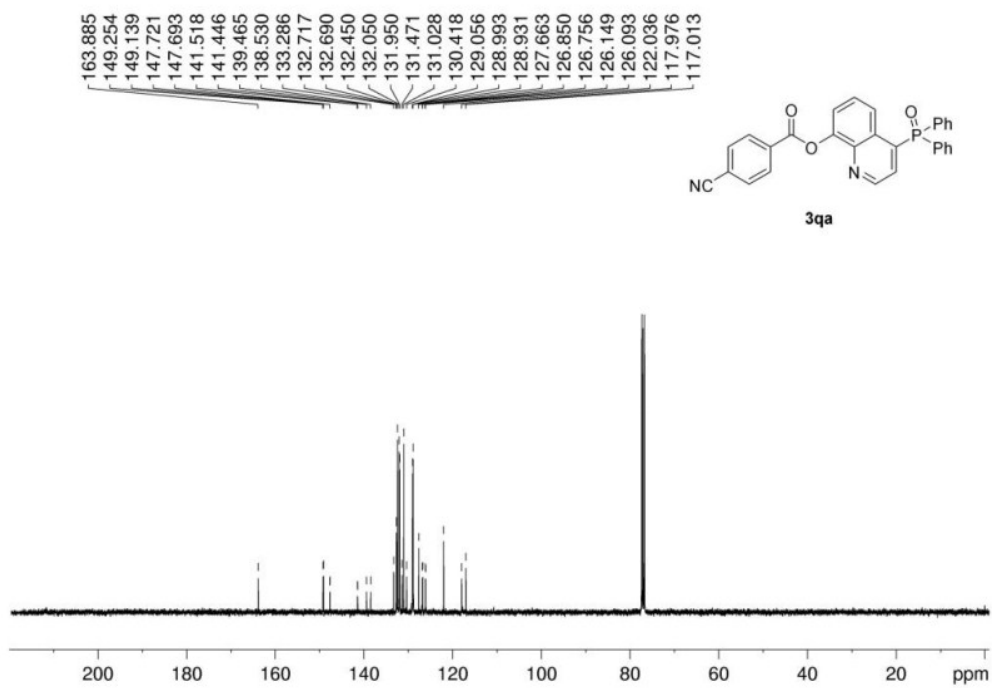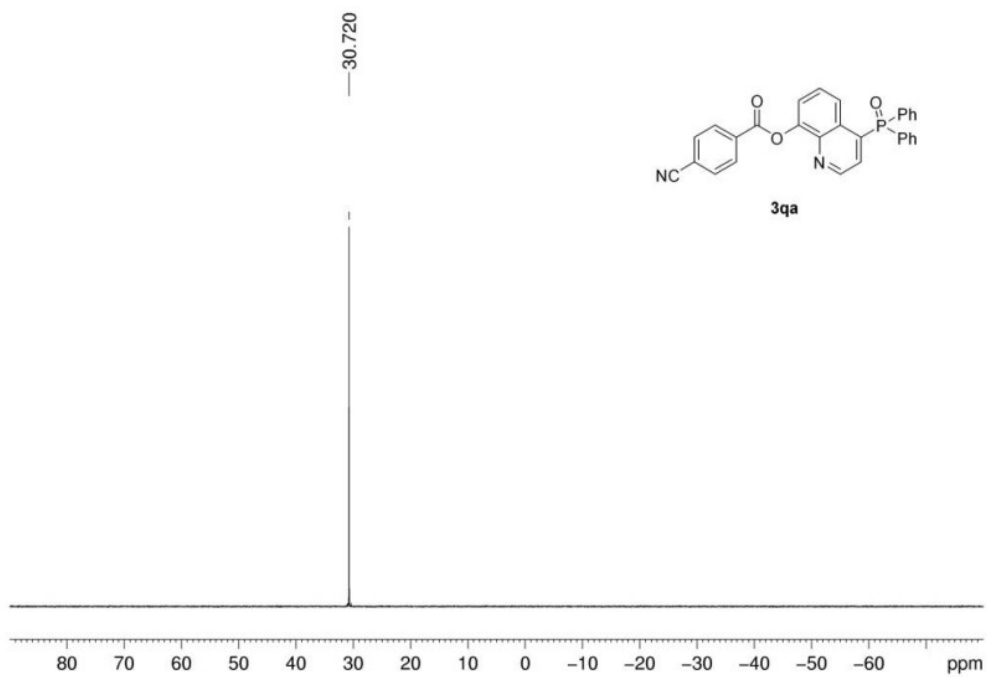



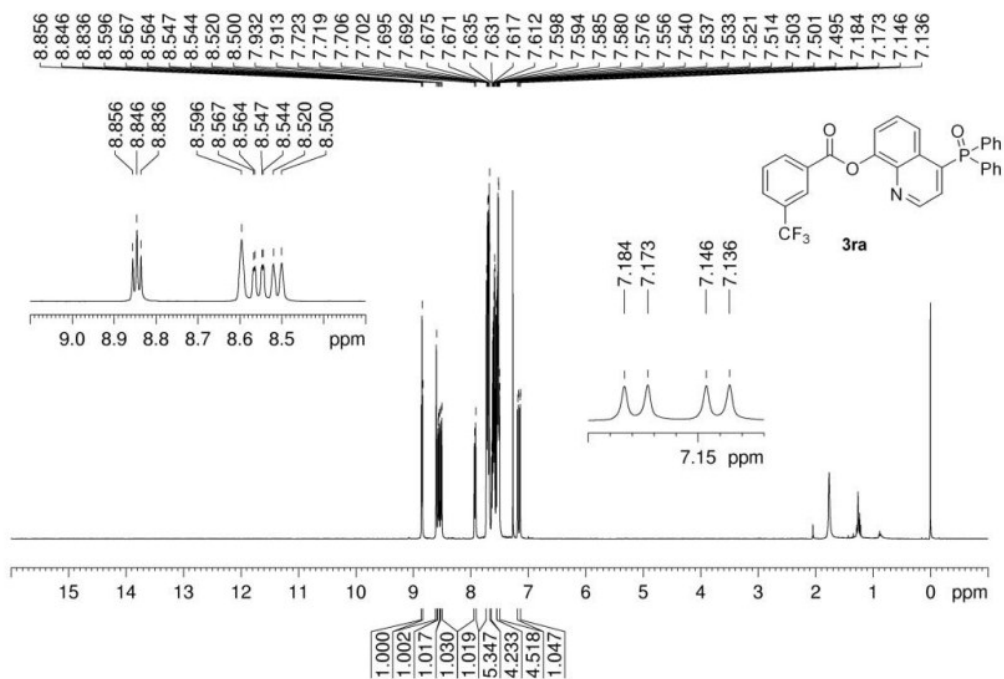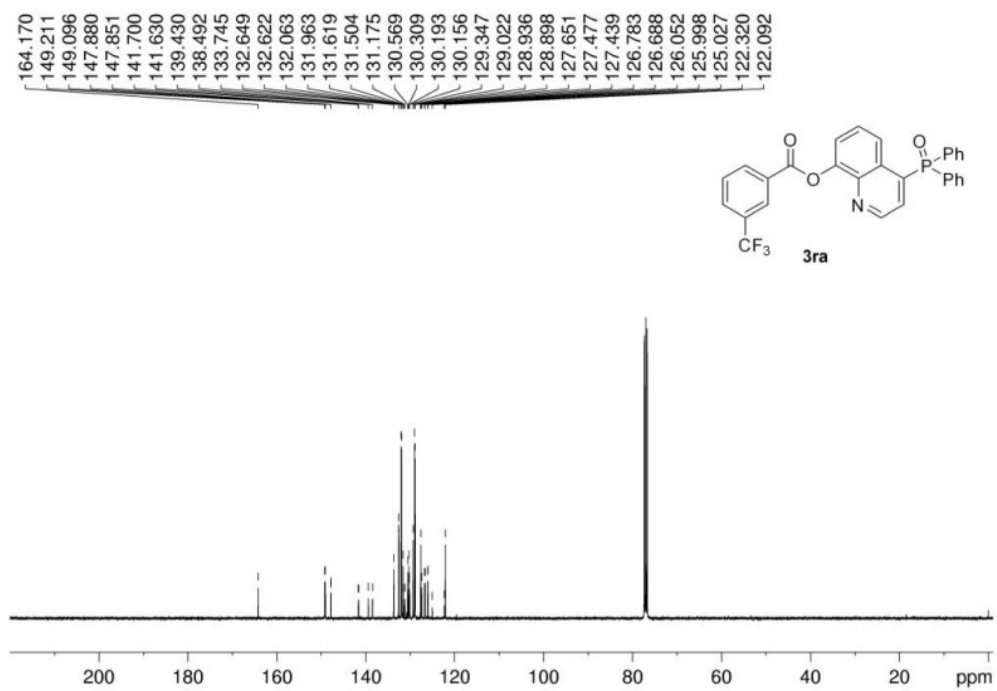

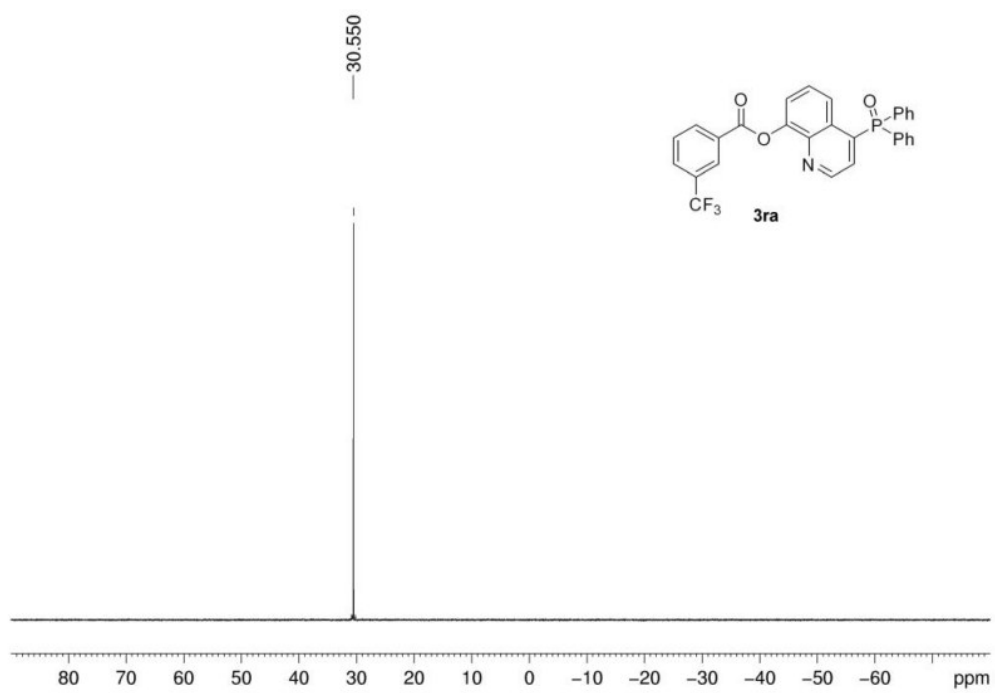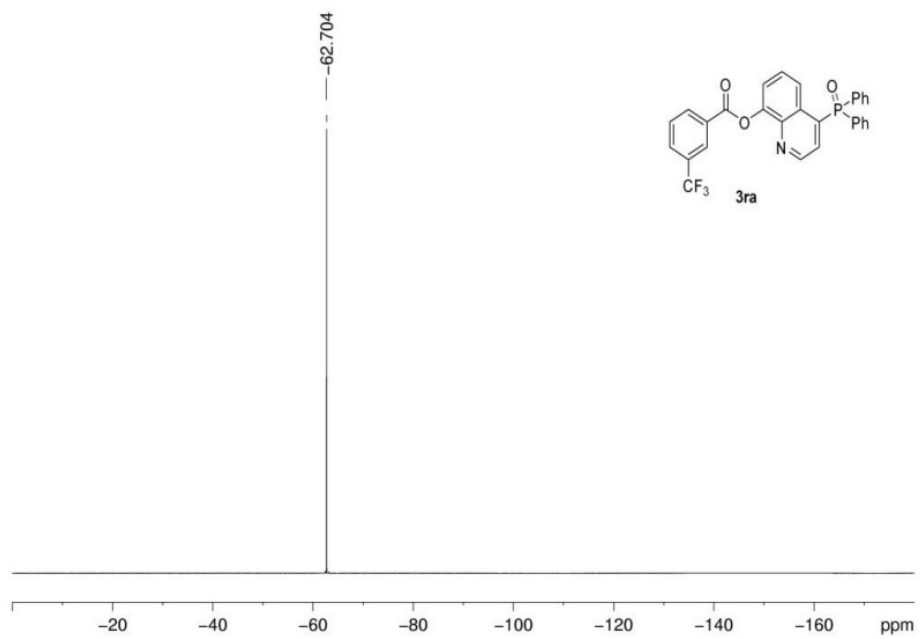

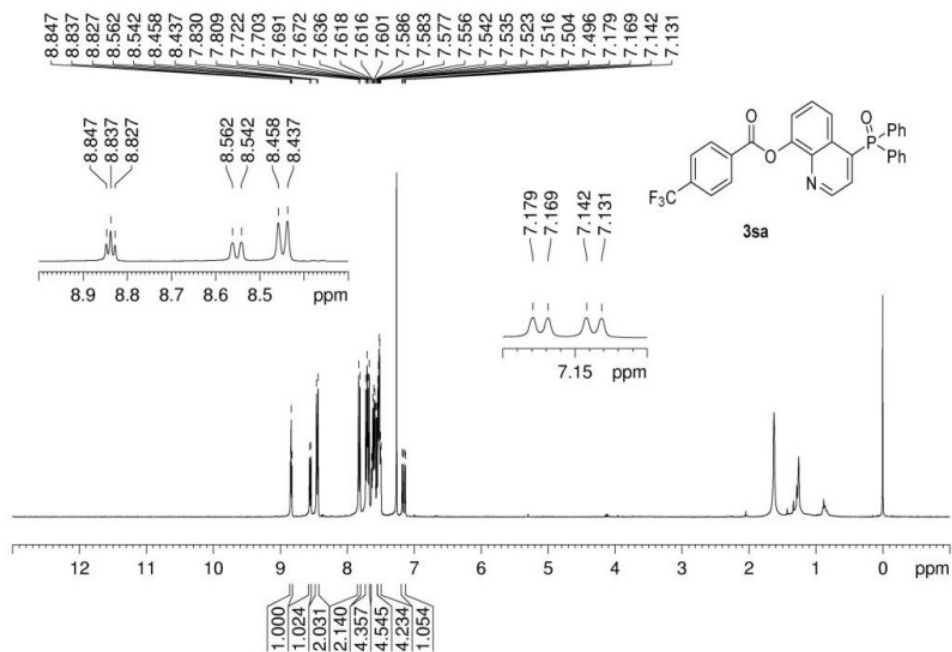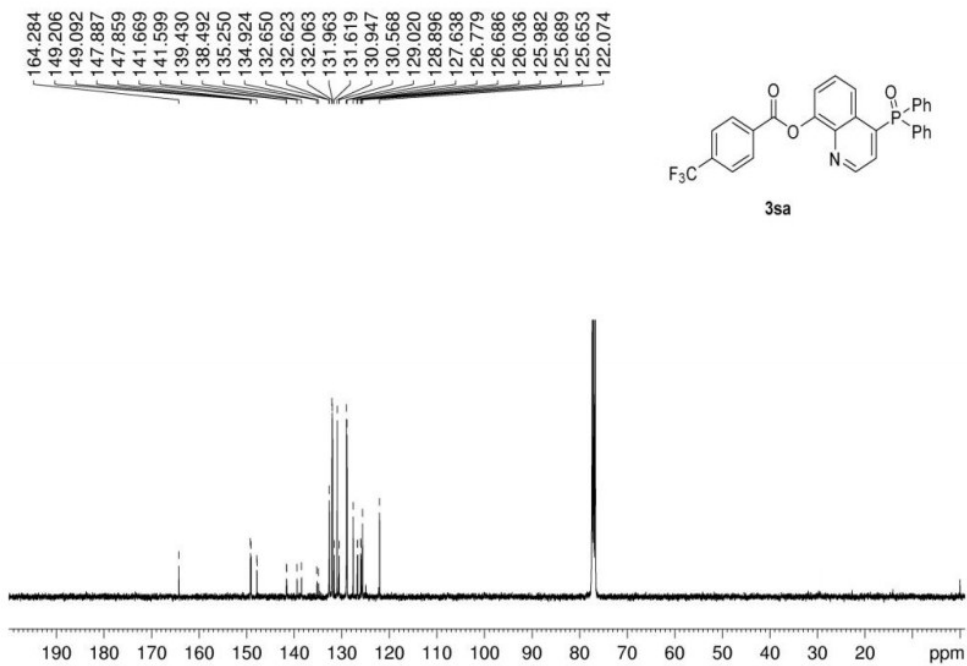

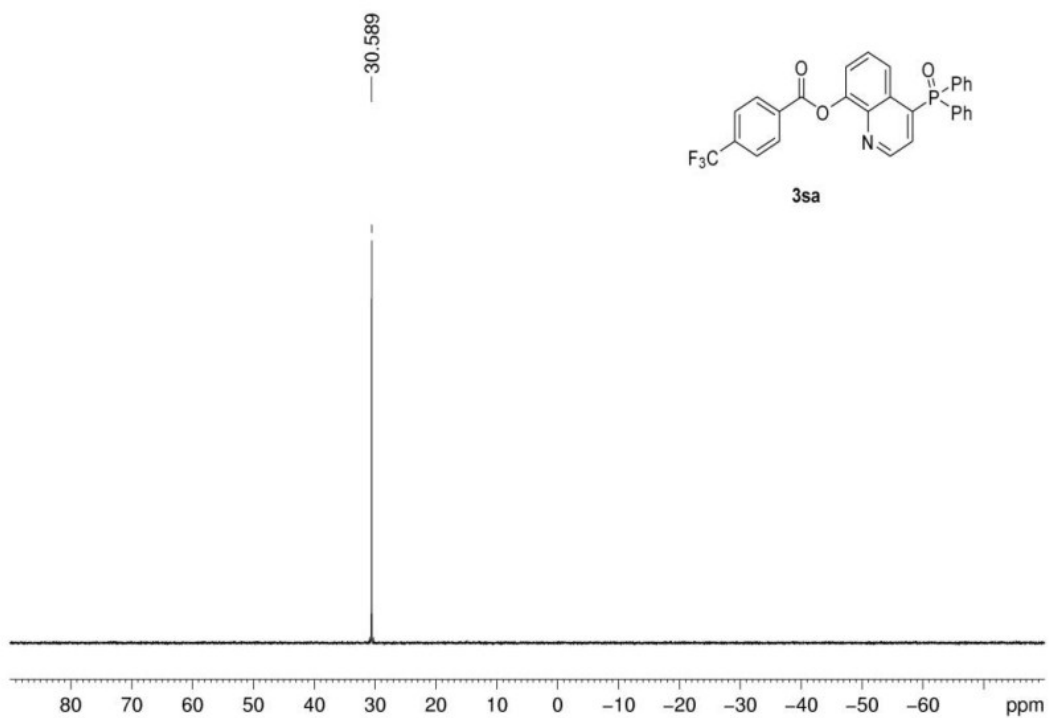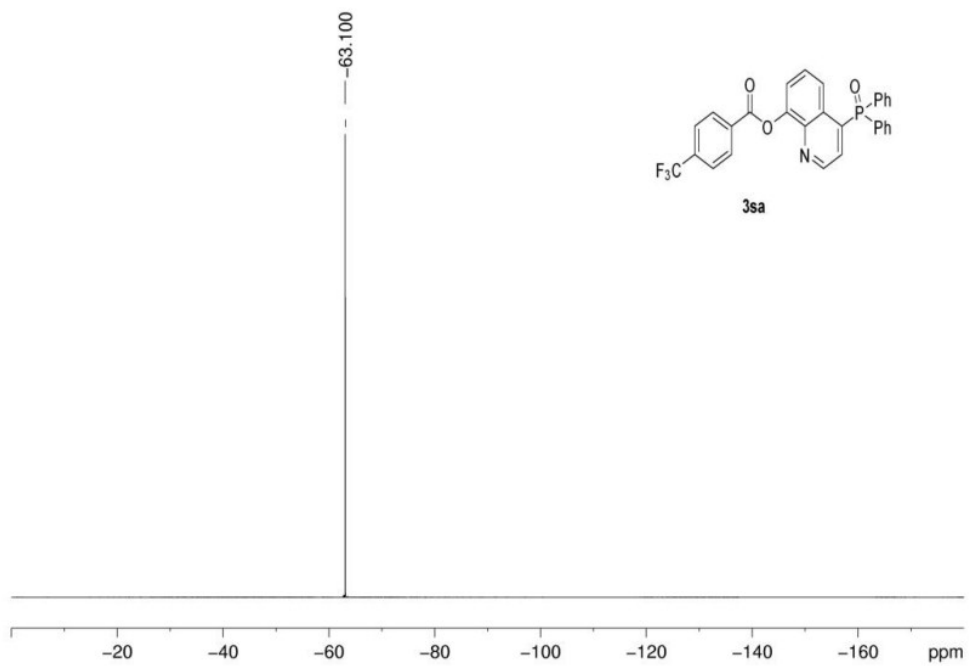

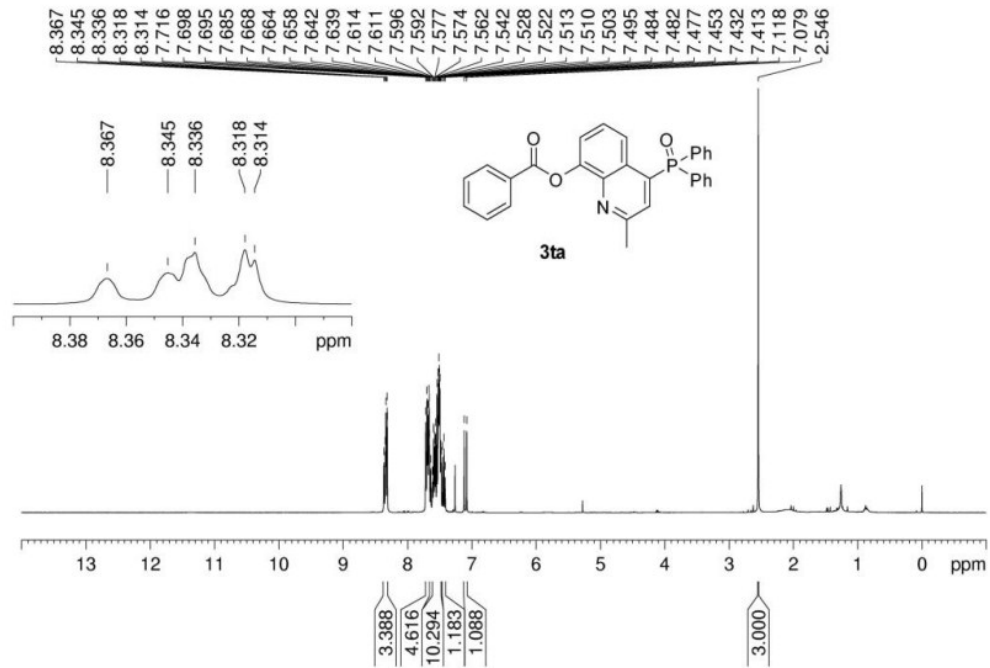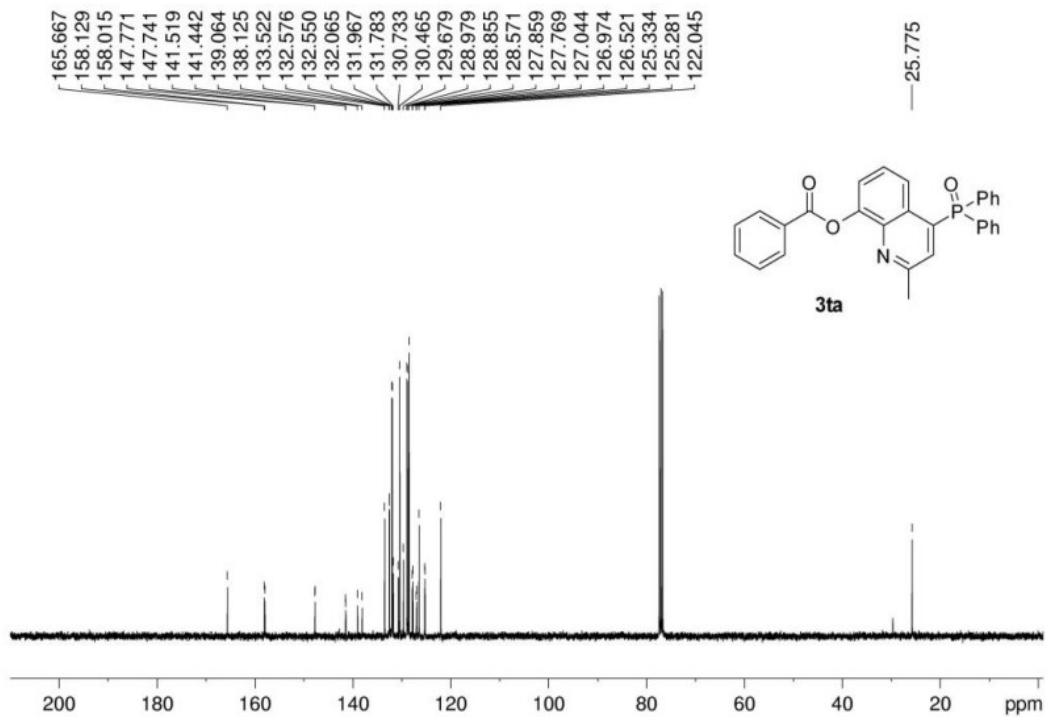

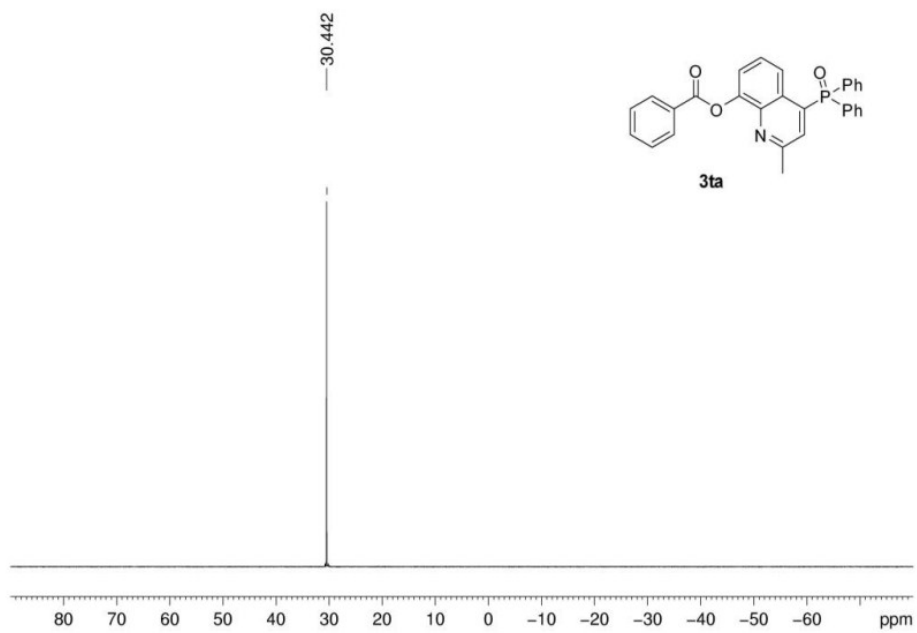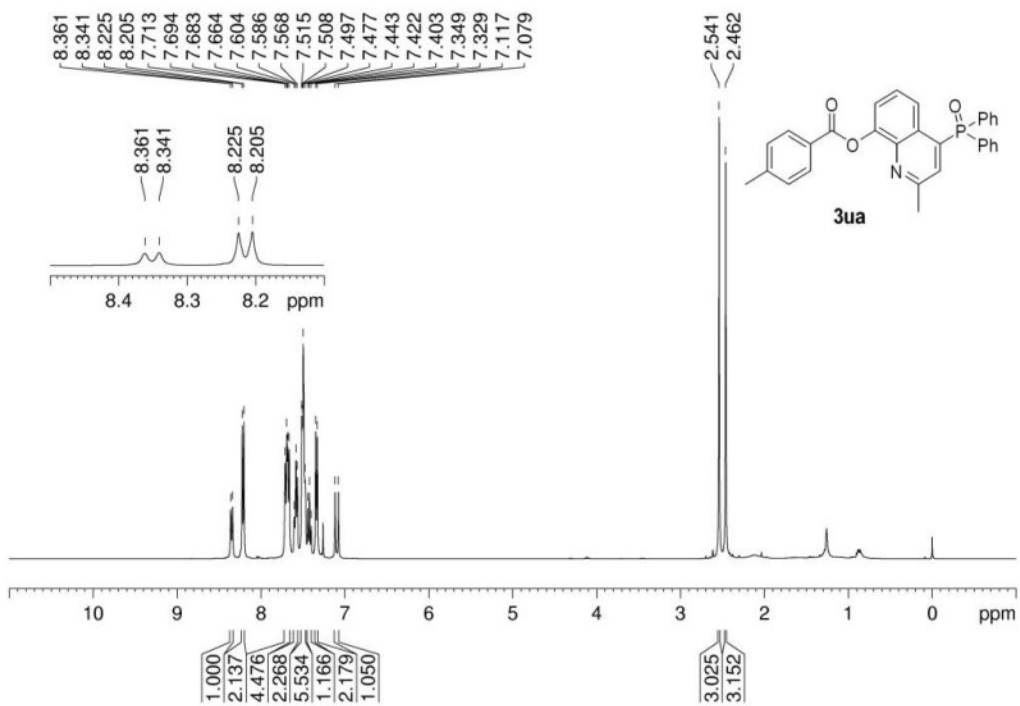

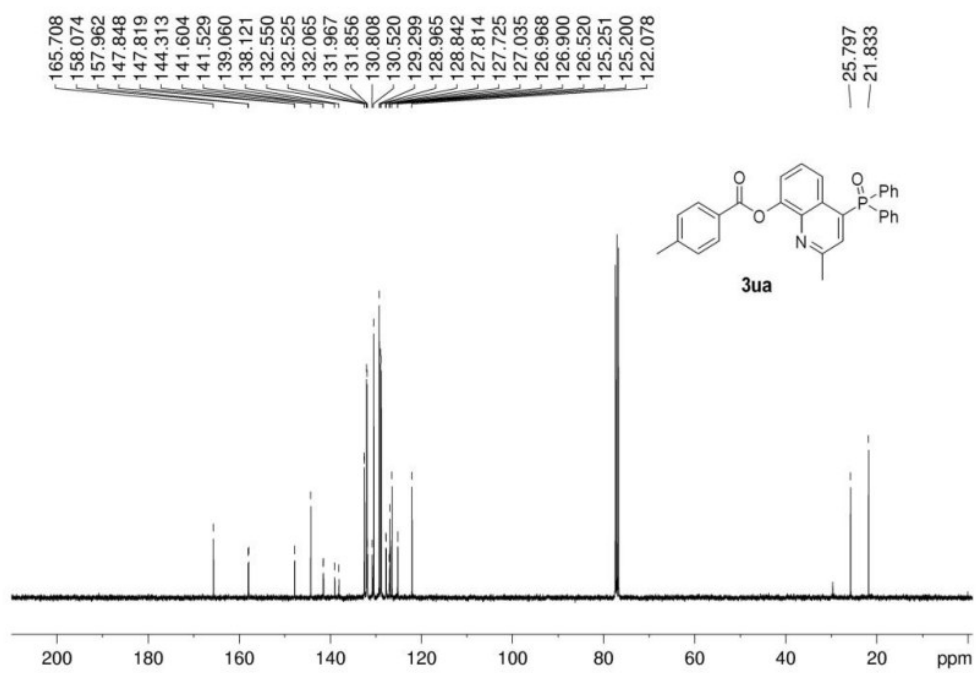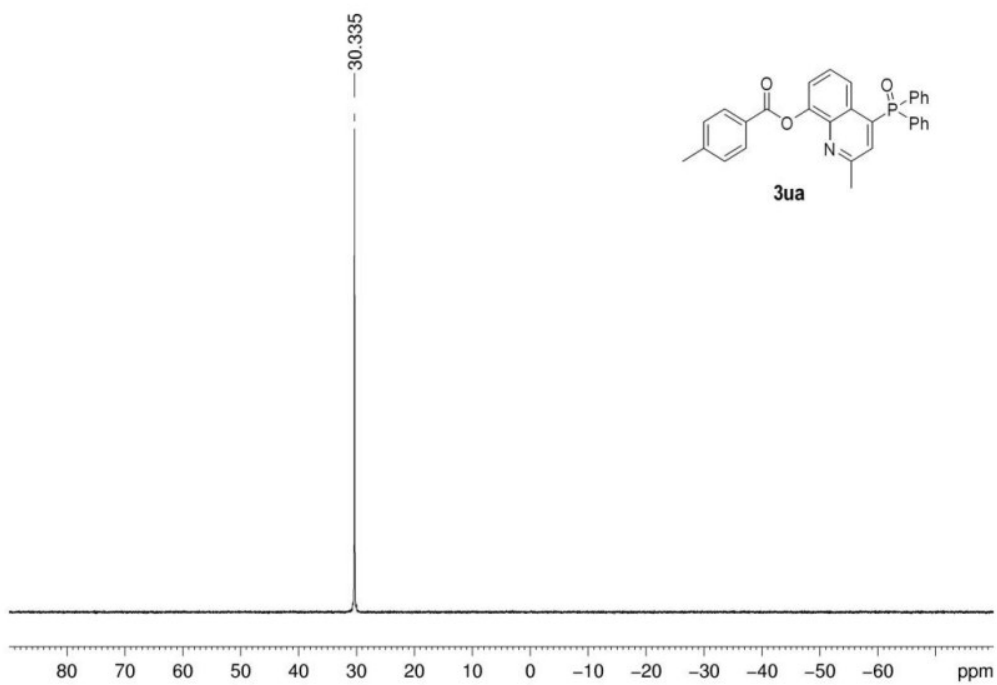

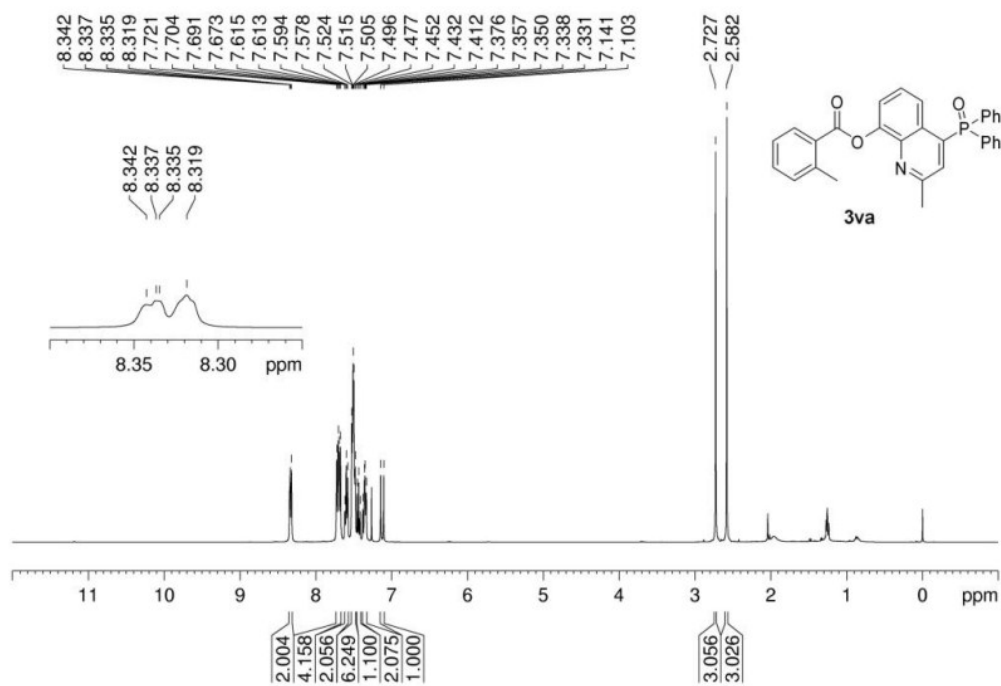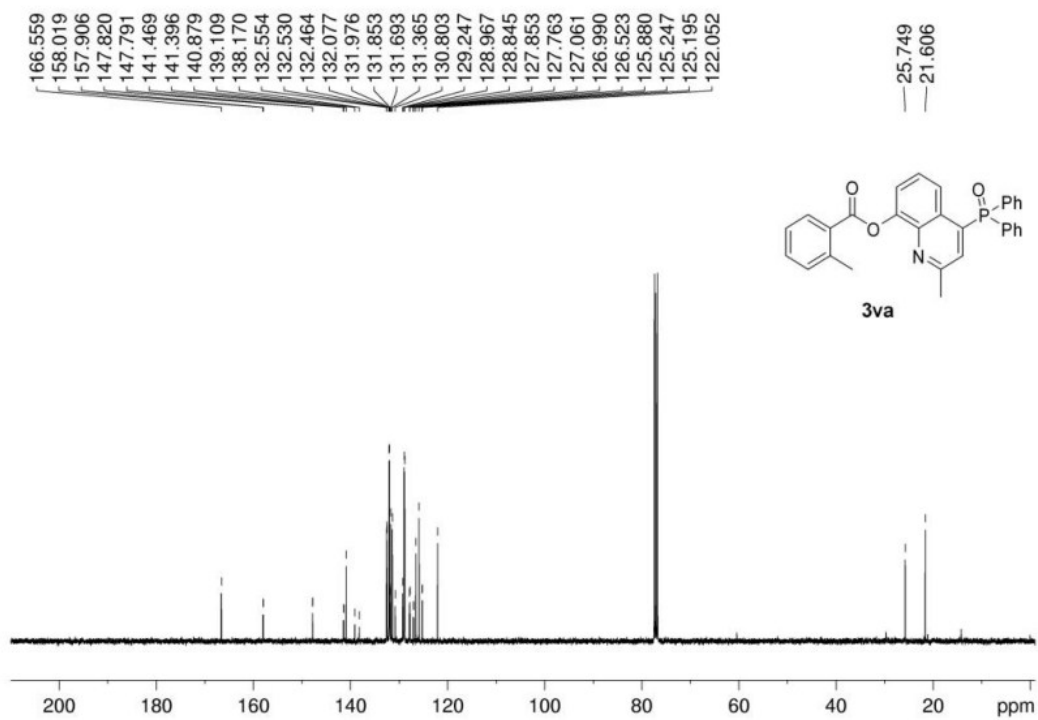



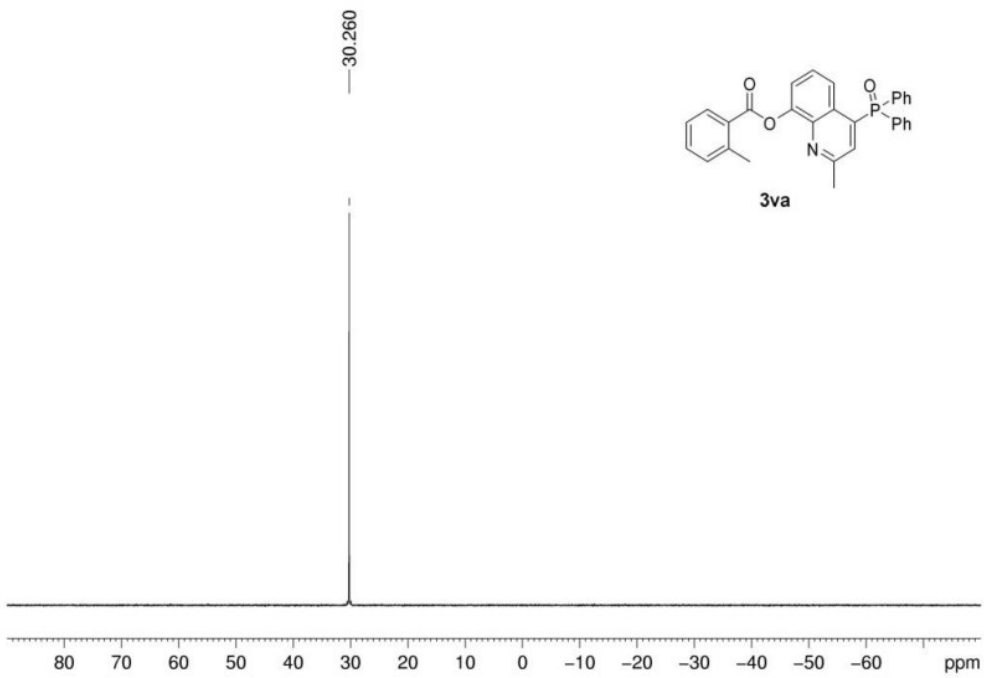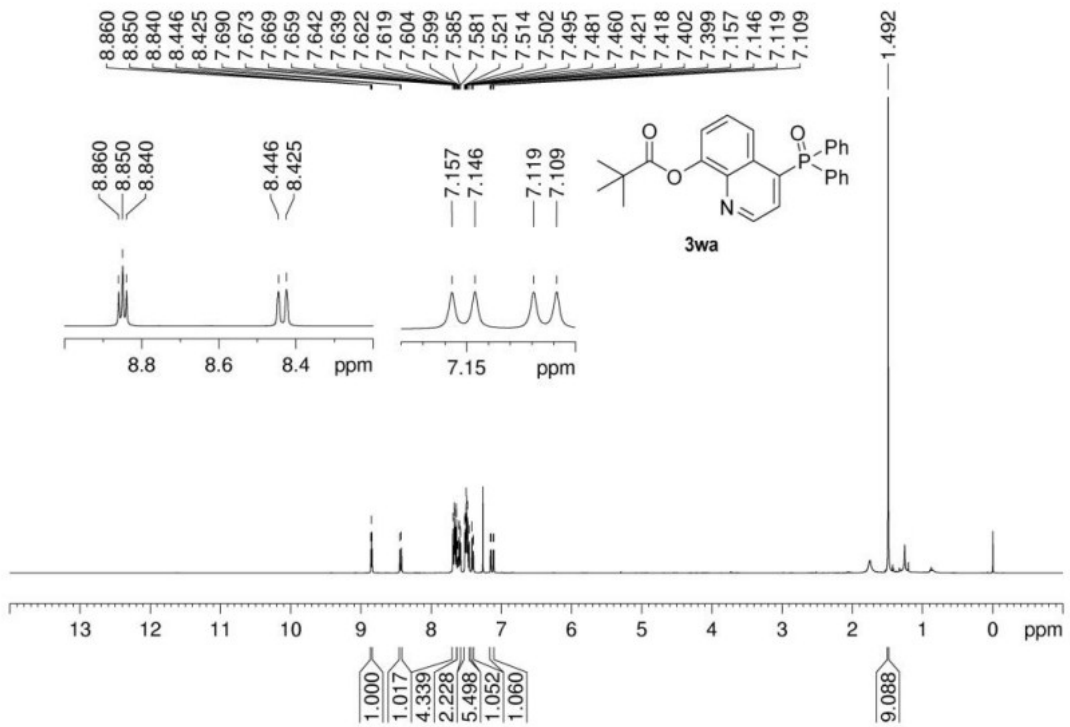

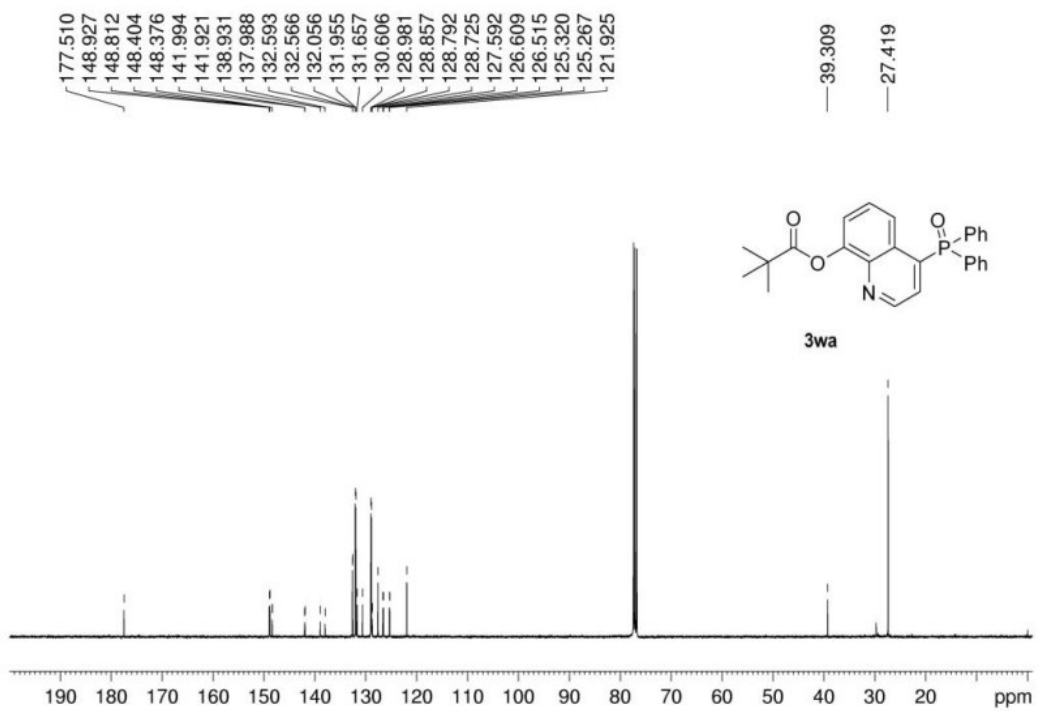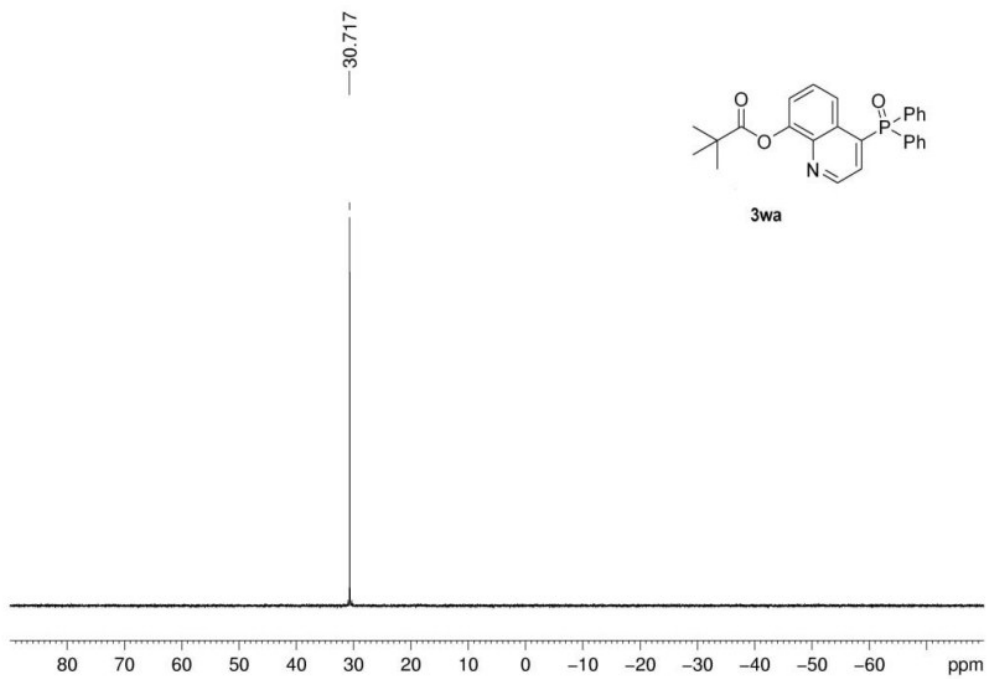

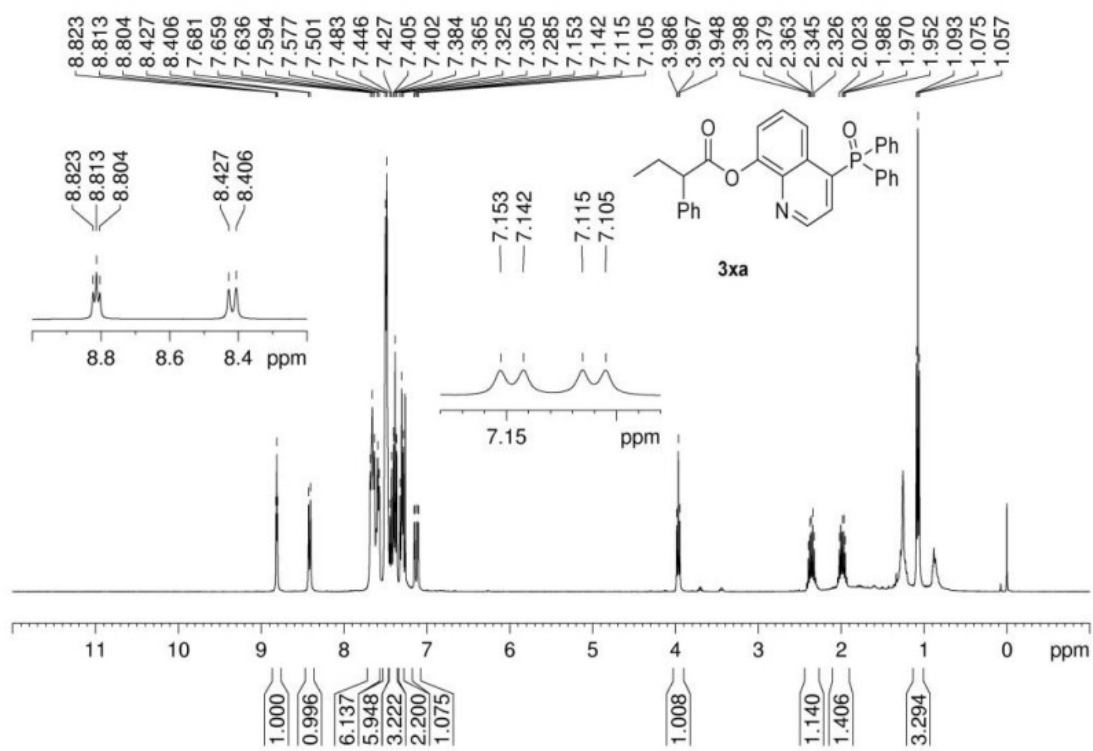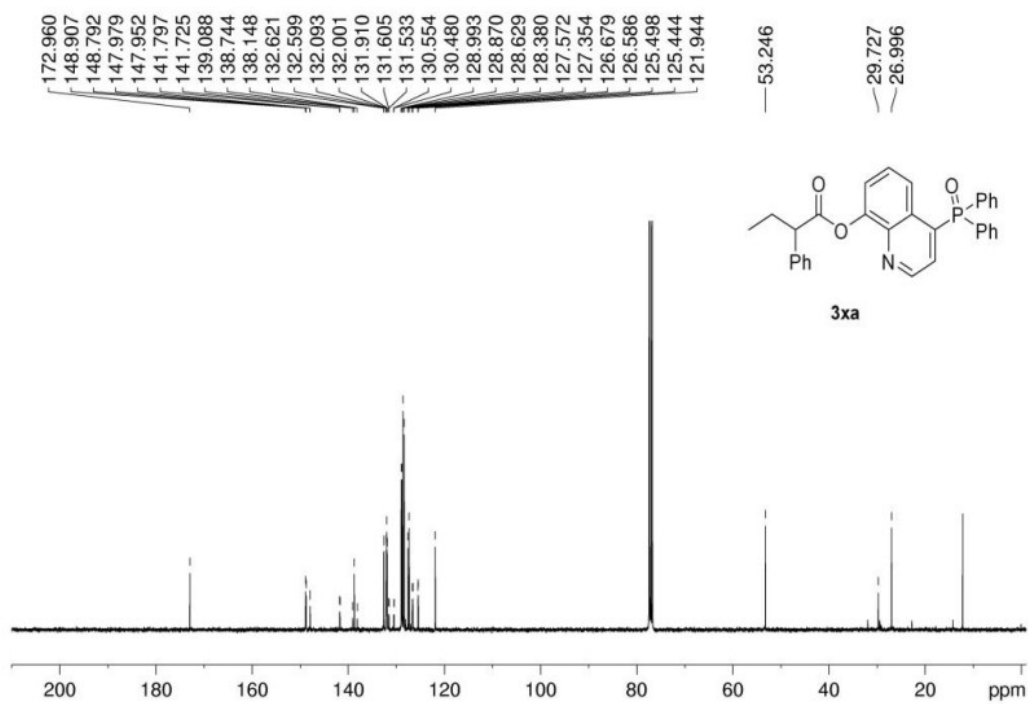

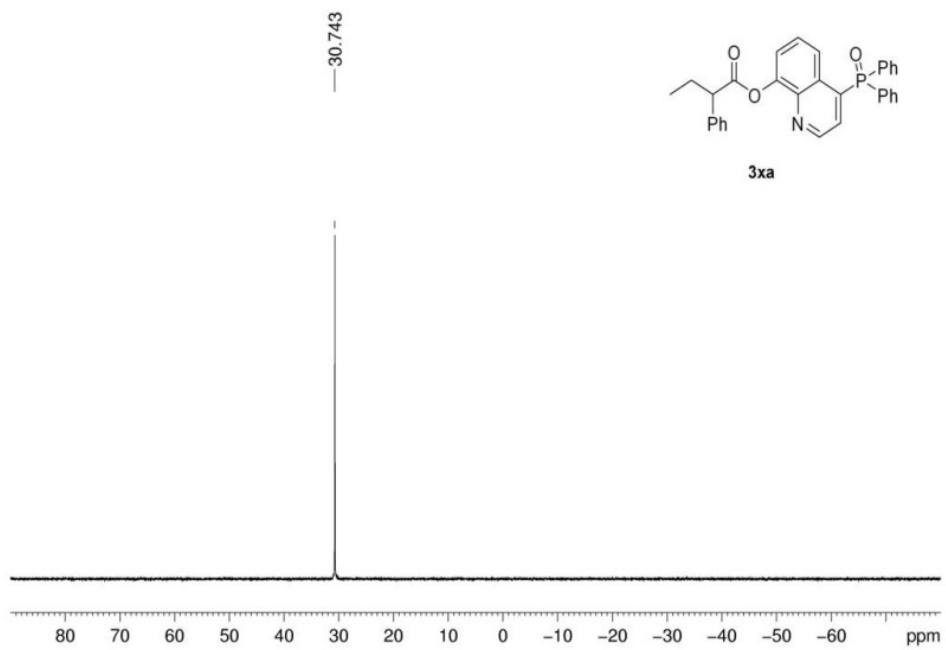

Supplement: c8ob00370j1.pdf [file c8ob00370j1.pdf]
